# Supplementary material for: The transcriptional landscape analysis of basal cell carcinomas reveals novel signalling pathways and actionable targets
Source: Life Sci Alliance. 2021 May 10;4(7):e202000651. doi: 10.26508/lsa.202000651 (PMC8200290; doi:10.26508/lsa.202000651)
Supplement: Supplementary file 2 [file LSA-2020-00651_TableS2.xlsx]

## Sheet: TableS2
Supplementary Table 2. Differentially-expressed genes between all BCC and normal skin controls using edgeR. FDR<0.05 and FC>2 or FC<0.5
Genes	logFC	logCPM	LR	PValue	FDR
SPRR3	9.66188	5.2559	59.5265	1.20656e-14	4.39669e-13
MMP1	8.19562	7.93965	107.559	3.3573e-25	8.94938e-23
MAGEA3	7.71486	1.56549	26.8351	2.21577e-07	1.97958e-06
CTAG2	7.61312	1.80686	20.955	4.70202e-06	3.16184e-05
MAGEA9B	7.44542	1.27855	44.5486	2.48124e-11	4.78004e-10
KISS1	7.43977	2.35033	80.6969	2.6314e-19	2.2803e-17
WI2-2373I1.2	7.39825	1.65156	27.6759	1.43441e-07	1.32996e-06
TCL6	7.34672	3.53774	87.2704	9.46559e-21	1.11069e-18
MAGEC2	7.11916	1.13542	13.6579	0.00021932	0.000968418
AC022311.1	6.96574	2.94952	113.166	1.98468e-26	6.66745e-24
MAGEA4	6.93855	4.1496	30.8445	2.79553e-08	3.01352e-07
MAGEA6	6.91157	1.93454	21.0217	4.54107e-06	3.05974e-05
DEFB4B	6.90604	1.78914	31.7119	1.78827e-08	1.99524e-07
MMP10	6.79184	4.35772	67.0168	2.69208e-16	1.34461e-14
FLJ26245	6.63946	5.26058	73.7774	8.74403e-18	5.81689e-16
BPIFB2	6.45392	2.3335	7.40043	0.00652081	0.0187563
DEFB4A	6.37884	4.4201	42.774	6.14445e-11	1.10799e-09
AMTN	6.32327	4.48519	62.2835	2.97412e-15	1.2279e-13
CTSLP8	6.27555	0.641894	40.2807	2.19972e-10	3.59161e-09
CLDN6	6.20329	2.18403	72.4721	1.69413e-17	1.06306e-15
MAGEA9	5.92567	-0.472833	28.1883	1.10068e-07	1.04301e-06
NKX2-3	5.85675	0.247777	30.5211	3.3026e-08	3.49258e-07
KRT24	5.85015	0.939061	27.6008	1.49113e-07	1.37735e-06
HHIP	5.83392	4.70434	91.0128	1.42745e-21	1.96824e-19
PRAME-2	5.79014	1.0999	74.1772	7.14116e-18	4.86471e-16
FER1L6-AS2	5.77698	0.32792	60.5506	7.17117e-15	2.71817e-13
FDCSP	5.61775	4.27085	23.4724	1.26717e-06	9.59728e-06
CRNN	5.59739	7.48862	82.598	1.00558e-19	9.59567e-18
PCDH8	5.57013	4.38669	66.7841	3.02931e-16	1.49178e-14
FAR2P1	5.52901	4.11123	40.3558	2.11679e-10	3.46774e-09
DEFB4B-2	5.51396	2.77251	25.3023	4.90117e-07	4.08831e-06
IL8	5.50526	6.42245	44.4608	2.59507e-11	4.98757e-10
OR7E5P	5.50481	-0.575862	62.9318	2.13991e-15	9.06375e-14
CTAG1B	5.47826	-0.428254	15.2692	9.32231e-05	0.000453972
PTCH2	5.4716	9.07515	157.41	4.16488e-36	1.27675e-32
MAGEA12	5.46846	0.511673	8.66207	0.00324903	0.0102838
FOXI3	5.45272	4.55968	143.363	4.89679e-33	6.32047e-30
LOC151760	5.34539	1.61829	48.7373	2.92649e-12	6.8613e-11
WTAPP1	5.32795	5.81703	42.7933	6.08404e-11	1.09871e-09
PAGE2	5.31227	1.3022	24.7318	6.58878e-07	5.33807e-06
VCX	5.23735	2.11642	59.3294	1.33372e-14	4.8171e-13
NCOR1P1	5.21572	-0.230281	20.5689	5.7524e-06	3.78209e-05
MYL7	5.214	0.305851	43.8495	3.54613e-11	6.6589e-10
CSAG1	5.20259	-0.666863	13.863	0.000196632	0.00087788
VCX3A	5.19987	0.160055	58.7417	1.79786e-14	6.32579e-13
CLDN19	5.18167	4.32931	95.742	1.30873e-22	2.21347e-20
RP11-519M16.1	5.16888	0.599007	68.3625	1.36037e-16	7.23681e-15
GALNT9	5.12323	4.70488	57.549	3.29659e-14	1.1213e-12
CHGA	5.11611	3.04845	45.6498	1.41402e-11	2.87541e-10
KIF12	5.09219	7.19063	104.862	1.30953e-24	3.08797e-22
LOC728755	5.07028	-0.597242	65.5067	5.79173e-16	2.71062e-14
AC226118.1	5.01709	2.16868	134.022	5.4025e-31	4.90707e-28
CXorf67	5.01315	0.288202	25.0098	5.70411e-07	4.69264e-06
LOC102723631	5.00304	-0.867461	13.5572	0.000231402	0.00101576
NKX6-1	4.98636	0.597421	88.374	5.41774e-21	6.67661e-19
GPHA2	4.97047	2.44244	67.2352	2.40972e-16	1.21347e-14
LOC100996624	4.96679	-0.529264	40.0071	2.53047e-10	4.08003e-09
LOC101928548	4.96425	1.83502	100.43	1.22653e-23	2.48589e-21
IRS4	4.93506	6.21453	109.678	1.15292e-25	3.28771e-23
CASC9	4.92705	2.38131	77.5395	1.30093e-18	1.00013e-16
SPON2	4.88861	9.33528	139.994	2.66977e-32	2.72806e-29
MMP11-2	4.86612	2.60737	79.3322	5.24976e-19	4.33485e-17
CABP1	4.8565	4.60915	112.715	2.49108e-26	8.03832e-24
LOC101929251	4.83763	-0.224469	35.63	2.38584e-09	3.20254e-08
LINC00303	4.83504	2.46254	99.6785	1.79255e-23	3.4078e-21
SPSB4	4.83192	3.68851	160.109	1.07084e-36	4.37689e-33
KRT76	4.83117	2.58771	6.75304	0.00935879	0.0255528
FGF19	4.80122	2.51921	57.6406	3.14667e-14	1.07478e-12
NXF2	4.79789	-1.30626	16.6301	4.54236e-05	0.00023869
TREML4	4.7934	-0.755321	12.6679	0.000371978	0.00154486
GAGE2A	4.78928	-0.90838	9.86437	0.0016851	0.00583334
IL36A	4.78158	0.75154	17.5523	2.79517e-05	0.000155018
SLCO1A2	4.7668	4.16424	64.3593	1.03675e-15	4.64815e-14
LOC100130872	4.76504	5.20877	112.849	2.32863e-26	7.61431e-24
ABCC12	4.75928	3.93644	60.5604	7.13566e-15	2.7089e-13
LOC100130502	4.75918	-0.36691	24.4644	7.56962e-07	6.04682e-06
MPPED1	4.75604	5.68499	56.9067	4.56992e-14	1.51245e-12
LOC100130673	4.75203	-0.316047	68.1738	1.49704e-16	7.81135e-15
CALCB	4.73731	3.25461	36.1088	1.86598e-09	2.56222e-08
MIR5002	4.72447	-0.746627	17.1582	3.43917e-05	0.000186351
C6orf58	4.7179	1.48482	23.5928	1.19033e-06	9.08831e-06
NPPB	4.69	-0.0939376	30.4744	3.38302e-08	3.56532e-07
CASC20	4.68625	-0.403028	43.8393	3.56482e-11	6.68889e-10
SPP1	4.67817	6.00875	78.3597	8.58853e-19	6.83848e-17
LOC102724654	4.6777	-1.20644	19.6488	9.30624e-06	5.81913e-05
H2BFM	4.66903	-0.459321	61.0181	5.65537e-15	2.19798e-13
CXCL1	4.6629	4.03592	61.3697	4.73035e-15	1.8627e-13
TSHR	4.65923	5.22438	114.473	1.02648e-26	3.93335e-24
MIR3187	4.63844	-0.835151	39.2947	3.64431e-10	5.71069e-09
LOC102723475	4.60872	1.14967	47.4134	5.74875e-12	1.26102e-10
KCNF1	4.60563	0.215769	50.8566	9.93652e-13	2.55166e-11
LOC392364	4.58643	-0.28322	30.4583	3.41126e-08	3.59201e-07
LOC102546175	4.57095	0.195314	91.0001	1.43662e-21	1.96824e-19
RPSAP52	4.54656	0.782382	75.8201	3.10729e-18	2.22816e-16
ALK	4.50926	4.84369	109.241	1.4373e-25	4.05153e-23
DEFB103B	4.50546	-1.23208	15.2842	9.24857e-05	0.000450702
KRT13	4.4741	6.80636	32.3907	1.2609e-08	1.45654e-07
ADAMTS3	4.47112	6.04838	159.323	1.59066e-36	5.57275e-33
FBN3	4.46334	7.60253	71.8417	2.33175e-17	1.4404e-15
CTAG1A	4.44815	-0.912304	11.3239	0.000765176	0.00292507
MYCNOS	4.44652	1.64423	112.625	2.60674e-26	8.3023e-24
FGF5	4.4272	3.77062	27.8258	1.32746e-07	1.24102e-06
LOC102724664	4.42635	-1.01088	45.974	1.19831e-11	2.45919e-10
HMGA2	4.42477	3.73441	79.8289	4.0828e-19	3.44078e-17
NTRK3	4.42255	6.35356	116.347	3.99033e-27	1.68722e-24
IL24	4.41464	3.34405	82.0535	1.32451e-19	1.23978e-17
MMP13	4.41322	3.76182	40.545	1.9214e-10	3.18597e-09
RBP2	4.41165	2.3261	66.7881	3.02311e-16	1.49173e-14
PROK2	4.40764	1.59356	27.7242	1.39902e-07	1.2996e-06
POU6F2	4.37971	1.09912	39.4591	3.34998e-10	5.29007e-09
OSM	4.35896	2.14644	42.7935	6.08339e-11	1.09871e-09
OR2Z1	4.35797	-2.09067	6.29437	0.0121122	0.0318917
RP11-188C12.3	4.35456	-1.23156	15.3463	8.94976e-05	0.00043748
FAM163B	4.34358	2.78589	51.0771	8.88062e-13	2.29492e-11
RP11-87E22.2	4.34085	2.54499	81.2311	2.00804e-19	1.78425e-17
MAEL	4.32969	2.41581	19.3558	1.08492e-05	6.67666e-05
NKX6-3	4.32458	-0.833707	11.617	0.000653516	0.00254799
LOC101928638	4.32345	-1.39599	22.198	2.45924e-06	1.75474e-05
AC024592.9	4.31878	1.39927	55.3208	1.02381e-13	3.14637e-12
KCNE1	4.29637	2.41156	85.1187	2.80984e-20	2.94233e-18
APCDD1L	4.2958	5.30115	102.928	3.47536e-24	7.74815e-22
AC011298.2	4.2942	0.0691161	28.4004	9.86451e-08	9.44251e-07
SPRR2C	4.28828	1.64173	23.7075	1.12147e-06	8.61084e-06
MIR503HG	4.27309	3.25453	65.3482	6.27685e-16	2.92094e-14
SPRR2F	4.2713	3.45018	34.9664	3.35447e-09	4.38046e-08
RNF183	4.23699	2.53742	55.8746	7.7246e-14	2.41939e-12
CXCL5	4.23306	2.7065	24.0696	9.29148e-07	7.28699e-06
FAM189A1-2	4.22426	1.76083	32.0753	1.48312e-08	1.68e-07
GABRG2	4.20242	1.82779	21.915	2.85001e-06	2.0044e-05
CACNG4	4.14013	4.12657	114.416	1.05664e-26	3.98661e-24
GLI1	4.13247	6.38106	131.753	1.69458e-30	1.43303e-27
LOC158434	4.128	1.95438	36.4292	1.58312e-09	2.20594e-08
IL1B	4.12589	5.61456	37.2481	1.04016e-09	1.50052e-08
NXF2B	4.10759	-1.64899	14.9855	0.000108339	0.000518317
ZPLD1	4.09868	3.41871	21.2187	4.09748e-06	2.79052e-05
SIGLECL1	4.09259	-1.18266	32.3543	1.28473e-08	1.48127e-07
HHIP-AS1	4.08105	2.64463	85.1467	2.77024e-20	2.92085e-18
C10orf71	4.06849	1.67193	37.3532	9.85595e-10	1.42769e-08
FAM150A	4.06274	0.0506831	28.5304	9.22396e-08	8.90508e-07
SYT4	4.06258	2.95824	7.89902	0.00494615	0.0148143
KIRREL2	4.05912	0.976203	42.0565	8.86746e-11	1.55666e-09
POTEF	4.05669	0.538721	18.0237	2.18172e-05	0.000124169
MARCH11	4.04779	1.49364	22.143	2.5308e-06	1.80213e-05
LOC101927335	4.04642	-0.848012	25.5247	4.3675e-07	3.68578e-06
RP5-1119D9.4	4.04427	0.420174	51.5808	6.87114e-13	1.81191e-11
FAM216B	4.04015	0.505786	28.7649	8.1718e-08	7.9684e-07
RP11-81H3.2	4.03132	-1.07501	30.6902	3.02684e-08	3.23584e-07
LOC102724598	4.02283	-0.598161	41.4423	1.21405e-10	2.08643e-09
LINC01096	4.01855	0.0433014	55.1091	1.14021e-13	3.48148e-12
CASC15	4.01082	4.37489	114.488	1.01892e-26	3.93335e-24
JPH3	4.00837	3.30921	70.5315	4.52984e-17	2.60774e-15
S100A12	4.00634	2.67719	43.0877	5.23403e-11	9.55054e-10
MYCN	3.99868	5.80315	126.702	2.15855e-29	1.43071e-26
NPSR1	3.99439	-1.66259	23.4796	1.26245e-06	9.5645e-06
OLFM4	3.9941	3.89416	45.8177	1.29787e-11	2.6502e-10
MMP3	3.99392	5.83461	31.7339	1.76812e-08	1.97636e-07
LOC102723817	3.97495	-0.306711	68.5743	1.22187e-16	6.591e-15
LOC102723670	3.97419	2.44868	61.4318	4.58351e-15	1.813e-13
OLIG2	3.94296	-0.299938	17.6214	2.69535e-05	0.000150093
DLX1	3.94265	3.50569	117.108	2.71846e-27	1.16961e-24
LOC100506869	3.93974	0.139679	15.0497	0.000104718	0.000502814
LOC101927823	3.9287	1.22639	44.3629	2.72805e-11	5.21456e-10
PLEKHG4B	3.92185	6.33456	114.037	1.27868e-26	4.61152e-24
COL10A1	3.91207	5.23526	52.962	3.40058e-13	9.48758e-12
XCL1	3.90876	2.05852	89.8479	2.57191e-21	3.37292e-19
TMEM179-2	3.90644	-1.15767	46.4336	9.47755e-12	1.98486e-10
SH3GL3	3.90184	3.91651	173.837	1.07422e-39	5.26885e-36
LINC00648	3.89771	3.1591	56.6041	5.32997e-14	1.73129e-12
TUBB8	3.89305	0.882673	47.4192	5.73183e-12	1.25844e-10
EDN2	3.87422	5.13307	107.326	3.77571e-25	9.95651e-23
MLC1	3.85892	4.21167	70.6493	4.2672e-17	2.49164e-15
CTB-12O2.1	3.85525	-0.0423567	33.1579	8.49704e-09	1.02904e-07
LOC102724852	3.84394	-1.31314	18.6268	1.58969e-05	9.42593e-05
PCDH11X	3.83238	3.81456	87.5149	8.36473e-21	1.00067e-18
PCBP3	3.82409	4.05554	144.012	3.5312e-33	5.41245e-30
LOC101928535	3.81953	-1.61599	9.16281	0.00246983	0.00811498
CYP2W1	3.81381	6.34874	59.2451	1.39208e-14	5.00579e-13
LOC102724471	3.81158	-1.19843	5.80658	0.0159663	0.0402259
LOC102724073	3.80731	-1.62934	8.92734	0.00280933	0.00905692
ADARB2-AS1	3.80362	-1.0378	33.0776	8.85522e-09	1.06454e-07
PHEX	3.79277	3.81113	91.653	1.0329e-21	1.46421e-19
AACSP1	3.78188	3.5686	44.9873	1.98313e-11	3.91266e-10
LOC101927000	3.76872	-0.86422	28.0714	1.16923e-07	1.10286e-06
SPINK6	3.76742	0.778161	26.4771	2.66684e-07	2.34582e-06
LINC01007	3.76729	-0.714126	44.9808	1.98978e-11	3.92262e-10
RSPO2	3.75737	0.00375647	17.3697	3.07685e-05	0.000168731
SIX3	3.75373	-0.283785	20.6096	5.63128e-06	3.71441e-05
LOC100996433	3.74888	0.491981	88.1016	6.21759e-21	7.62401e-19
LOC102724783	3.74624	3.11831	79.7368	4.2775e-19	3.59252e-17
WNT6	3.74474	3.81791	96.9013	7.28704e-23	1.2585e-20
LINC00552	3.74404	-1.78472	7.39454	0.00654223	0.0188069
B4GALNT4	3.74036	5.60569	130.424	3.30999e-30	2.61852e-27
SOHLH1	3.73932	1.00469	9.19166	0.0024312	0.0080052
CST1	3.73806	2.66999	16.9345	3.86913e-05	0.000206905
KCNH3	3.73714	3.34899	113.949	1.33685e-26	4.75143e-24
S100A7A	3.73532	7.55527	33.1481	8.53984e-09	1.03321e-07
LMO3	3.73168	6.80881	43.9649	3.34322e-11	6.30686e-10
XAGE-4	3.73074	-1.13989	16.6993	4.37974e-05	0.000231086
AMH	3.72017	3.1559	44.1799	2.99541e-11	5.68572e-10
LINC00092	3.71993	1.98855	92.2541	7.62327e-22	1.14695e-19
LINC00668	3.71089	2.97495	58.9111	1.64957e-14	5.84597e-13
GCGR	3.70427	3.7699	35.0599	3.19716e-09	4.19514e-08
GPR78	3.70116	2.07428	54.5634	1.50514e-13	4.50146e-12
LOC101060157	3.69591	-0.421848	5.37311	0.0204495	0.0496823
FAT3	3.69476	6.32403	66.8469	2.93433e-16	1.45377e-14
LRRTM4	3.68482	3.68966	21.3603	3.80562e-06	2.60841e-05
DNAJB13	3.67894	1.29411	65.0629	7.25462e-16	3.33794e-14
AMBP	3.67821	1.92427	57.486	3.40388e-14	1.15299e-12
SLC39A14	3.67665	8.43878	204.635	2.03422e-46	2.49436e-42
RBFOX1	3.67664	4.34436	47.3184	6.03426e-12	1.31893e-10
RBFOX3	3.67339	3.01997	46.0857	1.13192e-11	2.34058e-10
SH2D5	3.66793	1.82034	87.1486	1.00667e-20	1.1756e-18
CXCL13	3.66674	3.18346	42.0855	8.73703e-11	1.53927e-09
LINC00336	3.66208	-1.32832	12.834	0.000340385	0.00142645
LOC101927091	3.6609	1.16578	56.3587	6.03841e-14	1.94339e-12
IGSF11-AS1	3.6577	-1.88728	8.4591	0.00363221	0.0113417
OMP	3.65756	-1.86082	8.51209	0.00352795	0.011054
EPHA10	3.65684	3.95949	62.9878	2.07991e-15	8.88634e-14
SSTR2	3.65622	2.87708	69.6992	6.90756e-17	3.8326e-15
KHDC3L	3.64774	-1.31566	14.3863	0.000148878	0.000686353
LOC102723828	3.64368	0.699989	16.9895	3.75875e-05	0.00020175
DLX2	3.64216	2.40288	113.548	1.63708e-26	5.6546e-24
LOC102724053	3.63669	-0.920507	32.1574	1.42175e-08	1.61946e-07
OR52D1	3.63533	-1.82416	8.87821	0.00288594	0.00927527
LOC100129940	3.63279	1.95929	56.7972	4.83162e-14	1.58622e-12
SBK2	3.62289	-1.00857	24.8195	6.29564e-07	5.11917e-06
AMER2	3.61506	3.42524	39.1595	3.90549e-10	6.07731e-09
LOC100505588	3.61475	1.3054	66.0617	4.37024e-16	2.10561e-14
H19	3.61432	4.57123	35.591	2.43404e-09	3.26188e-08
APCDD1L-AS1	3.59913	3.36494	78.0326	1.01352e-18	7.99214e-17
GLI2	3.59555	6.919	145.547	1.63101e-33	2.85706e-30
TDO2-2	3.58128	0.17067	13.8889	0.000193945	0.000867621
CHAT	3.5787	0.920669	17.8486	2.39196e-05	0.000134882
VGLL1	3.57116	0.564733	40.7099	1.76586e-10	2.96008e-09
MYL10	3.55082	0.387295	16.0726	6.09582e-05	0.000310733
OFCC1	3.54616	-0.572112	30.506	3.32834e-08	3.51829e-07
SLC6A10P	3.54065	2.28199	14.355	0.000151378	0.000696638
LOC101928272	3.53916	-1.05749	19.5846	9.62424e-06	5.98592e-05
DYDC1	3.52673	-0.464954	54.0188	1.98576e-13	5.79747e-12
LOC100507346	3.52089	5.26599	90.2218	2.129e-21	2.82225e-19
H2BFWT	3.51769	-0.806421	46.017	1.17233e-11	2.41599e-10
TBX1	3.51663	7.02746	86.1053	1.70603e-20	1.87931e-18
LOC102723846	3.51459	-0.132467	13.9378	0.000188956	0.000848091
LOC101929427	3.51437	-0.0241183	47.6123	5.19408e-12	1.14756e-10
CCL11	3.51367	-0.444264	36.9572	1.20753e-09	1.72072e-08
IGF2BP2	3.51315	6.08732	187.614	1.05452e-42	6.46523e-39
LOC284600	3.5048	2.63727	49.6396	1.8475e-12	4.50826e-11
LAMP5	3.50286	3.41992	81.9737	1.37906e-19	1.27623e-17
KRT6C	3.49791	9.02302	36.2376	1.74669e-09	2.41329e-08
TMEFF1	3.49663	-1.3221	32.3519	1.28629e-08	1.48238e-07
LOC101927131	3.49526	-1.18336	13.0396	0.000304979	0.00129602
LOC101928358	3.4934	2.46835	85.4293	2.40136e-20	2.58293e-18
CSF3	3.49249	0.819569	15.9194	6.60974e-05	0.000333671
LGR5	3.48885	7.767	101.237	8.16127e-24	1.74041e-21
LOC101929724	3.48711	4.71951	62.9336	2.13789e-15	9.06375e-14
TFAP2B	3.48387	7.71631	131.036	2.43161e-30	1.98776e-27
FEZF1	3.47812	-1.14906	16.733	4.30267e-05	0.000227411
EDAR	3.46788	5.03323	82.5341	1.03865e-19	9.83467e-18
FOXB1	3.4671	-1.36896	10.1759	0.00142288	0.0050455
NTRK3-AS1	3.46674	-1.38846	18.1348	2.05809e-05	0.000118355
MAGEA10	3.46614	1.72664	13.9112	0.000191654	0.000858627
ZNF98	3.45169	-0.18702	33.2179	8.23894e-09	1.00075e-07
TMEM200C	3.44882	3.39363	106.393	6.0483e-25	1.48329e-22
ADAMTSL2	3.44343	3.63191	65.5011	5.8082e-16	2.71315e-14
GBX2	3.44136	2.49392	37.0373	1.15894e-09	1.65628e-08
LOC102723961	3.43727	-0.858848	59.3033	1.3515e-14	4.87416e-13
MSI1	3.43378	3.54194	122.164	2.12479e-28	1.13279e-25
LOC101929384	3.43304	-1.03827	28.5674	9.04934e-08	8.76139e-07
OTP	3.42465	-2.06587	11.6694	0.000635375	0.00248238
PCDHA5	3.42412	-0.796069	15.1278	0.000100474	0.000485235
SYN3	3.41241	1.26945	44.7092	2.28582e-11	4.44548e-10
C10orf85	3.40918	1.58157	54.2309	1.78265e-13	5.27993e-12
AL592528.1	3.40767	-1.07096	32.3453	1.29069e-08	1.48675e-07
CAMK1G	3.4048	0.116477	49.5411	1.94263e-12	4.70762e-11
PDGFA	3.40216	7.47037	149.94	1.78708e-34	3.6522e-31
CSPG4	3.39937	8.4609	155.245	1.23781e-35	3.0356e-32
LINC00589	3.39582	-1.09136	19.627	9.41277e-06	5.87675e-05
LOC102723717-2	3.39168	-1.4452	7.86009	0.0050538	0.0151035
CFC1	3.38216	-2.16994	10.4552	0.00122302	0.0044121
RP11-542B15.1	3.38152	-0.98571	51.017	9.15697e-13	2.36136e-11
RP11-767I20.1	3.38077	-1.38423	11.5219	0.000687821	0.00266437
DRAXIN	3.37717	0.15638	64.4542	9.88043e-16	4.45419e-14
GUCA2B	3.37219	-0.506119	14.6857	0.000127007	0.000596688
CHRDL2	3.37001	3.44222	46.9583	7.25128e-12	1.55855e-10
TUBA3E	3.36887	-0.380913	18.4082	1.78289e-05	0.000104352
CCL25	3.36832	-0.672912	34.6712	3.9037e-09	5.0413e-08
PNOC	3.3593	0.96183	27.2961	1.74564e-07	1.59323e-06
LOC101928469	3.3552	-0.659823	48.7423	2.91897e-12	6.85022e-11
RP11-389K14.3	3.35413	-0.264734	28.2275	1.07859e-07	1.02365e-06
LOC102723730	3.3523	-0.563244	19.9372	8.00282e-06	5.07397e-05
ELFN1	3.34745	4.69628	117.516	2.2127e-27	9.86622e-25
FOXL1	3.34723	2.76116	49.4159	2.07056e-12	4.98805e-11
LOC101929866	3.34459	-1.00332	8.79629	0.00301843	0.00964986
FOXA2	3.34122	-1.25955	9.81566	0.00173032	0.00596576
INHBA	3.33755	4.77323	50.1866	1.398e-12	3.50558e-11
LOC100126784	3.33551	3.13552	147.282	6.8085e-34	1.2844e-30
NRTN	3.33164	3.99158	64.8833	7.9468e-16	3.61572e-14
PTCH1	3.33035	8.30332	117.784	1.93355e-27	8.94687e-25
COL11A1	3.33013	7.19419	57.987	2.63851e-14	9.11365e-13
OGDHL	3.32995	3.36144	42.8743	5.83725e-11	1.05648e-09
LRP8	3.3279	6.62414	233.13	1.2382e-52	3.03655e-48
FZD2	3.32603	4.25274	119.657	7.52038e-28	3.6886e-25
LOC102546227	3.32046	-0.460893	30.5575	3.24117e-08	3.438e-07
FLJ45079	3.31761	0.810716	24.94	5.91427e-07	4.83794e-06
FLJ45743	3.31486	2.53673	78.4885	8.04637e-19	6.46742e-17
HRNR	3.31188	4.41266	33.053	8.96789e-09	1.0765e-07
LOC101927210	3.29873	-1.39207	17.6386	2.67116e-05	0.000148881
EPCAM	3.29394	7.15677	91.8003	9.58789e-22	1.38314e-19
OLR1	3.2933	1.78831	47.1444	6.59463e-12	1.42868e-10
AL022344.4	3.29321	-0.103581	12.0544	0.000516693	0.00206947
TMSB15B	3.29135	-1.13956	24.291	8.28241e-07	6.5533e-06
LIX1	3.29087	3.08568	44.1232	3.08337e-11	5.83912e-10
ASCL4	3.28849	3.11914	53.0486	3.25397e-13	9.08888e-12
GFAP	3.28614	1.72712	45.7008	1.37766e-11	2.80613e-10
LOC102724567	3.28411	-2.15893	5.88617	0.0152603	0.0386495
LINC00858	3.27818	0.373465	32.3809	1.26726e-08	1.4632e-07
ANKRD18DP	3.27778	-1.34853	24.1845	8.75323e-07	6.90683e-06
NTN3	3.27368	-0.491446	47.091	6.77652e-12	1.46421e-10
RP11-406A20.1	3.26806	-1.91462	8.47084	0.00360884	0.0112786
FSD1	3.26128	0.765589	33.3632	7.64575e-09	9.34252e-08
ESM1	3.2582	1.51563	81.6007	1.66558e-19	1.50726e-17
PLAG1	3.24603	5.82124	127.278	1.61515e-29	1.13171e-26
LMX1B	3.24561	5.73006	113.362	1.79758e-26	6.12275e-24
LOC102723888	3.2393	-1.26629	14.5812	0.000134245	0.000626136
COL9A2	3.23929	6.43463	61.8763	3.65726e-15	1.48004e-13
OR8D1	3.2389	-2.20636	6.50375	0.0107647	0.028814
LOC102724781	3.23875	-0.63194	35.1487	3.05468e-09	4.01678e-08
LOC101927810	3.23394	0.178386	30.6708	3.05732e-08	3.26416e-07
LOC102724686	3.23009	-0.788094	21.8157	3.00139e-06	2.10243e-05
KIF26A	3.22824	6.04428	81.956	1.39152e-19	1.28292e-17
FOXO6	3.22514	4.48877	125.427	4.10453e-29	2.58101e-26
TCN1	3.22286	4.69888	20.5886	5.69347e-06	3.75038e-05
SFRP5	3.22124	4.47743	33.6543	6.5828e-09	8.16987e-08
LOC102723482	3.21594	-1.85023	12.8139	0.000344054	0.00144011
CCDC105	3.21024	-1.34431	16.1964	5.71015e-05	0.000293168
SYNPR	3.20764	0.958277	37.6731	8.36517e-10	1.22476e-08
TDRD12	3.20566	1.60931	16.8656	4.01216e-05	0.000213576
C12orf54	3.20211	1.90602	80.2851	3.24097e-19	2.77907e-17
C20orf141	3.19378	-1.90312	8.04095	0.00457314	0.0138357
CHCHD7	3.19358	7.62841	129.072	6.53891e-30	4.8594e-27
SCGB1A1	3.19021	-0.580429	28.1467	1.12457e-07	1.06277e-06
ITPKA	3.18686	2.5055	64.2705	1.08455e-15	4.84474e-14
DENND2A	3.18334	4.92597	99.25	2.22555e-23	4.16636e-21
LOC102724623	3.18244	-2.07368	13.3851	0.000253637	0.00109956
GGNBP1	3.18197	-1.52753	10.1222	0.00146496	0.00517525
SNTN	3.17749	-1.43265	24.1547	8.88998e-07	7.00571e-06
NRSN1	3.17653	-1.77839	7.15596	0.00747152	0.0210442
GPR97	3.17463	2.06367	56.5193	5.56491e-14	1.80283e-12
SOX13	3.1704	6.9976	143.885	3.76527e-33	5.43174e-30
LOC102724894	3.16575	-0.747951	19.4551	1.0299e-05	6.37491e-05
LHX2	3.1653	6.5166	84.4054	4.03038e-20	4.11838e-18
PRMT8	3.16253	-0.370079	21.2641	4.00162e-06	2.72903e-05
LOC101928833	3.16218	1.12938	35.5372	2.50231e-09	3.34423e-08
NKX3-2	3.15828	0.522386	45.4664	1.55281e-11	3.1163e-10
MISP	3.15366	2.44156	52.42	4.48128e-13	1.22518e-11
CXCL6	3.15005	1.08176	15.6089	7.78861e-05	0.00038603
CA7	3.14974	-1.46764	9.96369	0.00159658	0.00556886
UNQ9370	3.14813	-1.87628	15.6607	7.57824e-05	0.000376746
MEX3A	3.14399	5.74666	102.522	4.26704e-24	9.34328e-22
KIRREL3-AS2	3.13994	-0.907644	6.18602	0.0128764	0.0335653
ADAMTS18	3.13923	3.87683	62.3186	2.92149e-15	1.21025e-13
LOC102724111	3.13833	-1.34317	30.4464	3.43223e-08	3.60943e-07
RP5-968D22.1	3.13526	-1.102	10.9289	0.000946776	0.0035244
FAM189A1	3.13001	-1.03376	12.2086	0.000475708	0.00192259
PTPRN2	3.12951	5.01412	109.789	1.09019e-25	3.1454e-23
GALR1	3.1289	-0.099116	26.0811	3.27374e-07	2.83393e-06
RP3-437I16.1	3.12734	-1.85314	12.1719	0.000485137	0.0019565
MRGPRD	3.12599	-1.54757	16.0327	6.22567e-05	0.000316694
TMEM257	3.12476	1.05708	44.8515	2.12558e-11	4.16545e-10
LOC101927205	3.12379	-1.69727	8.31767	0.00392612	0.0121494
TMSB15A	3.12289	2.42268	67.1013	2.57903e-16	1.29342e-14
MGAM-2	3.12161	-1.585	11.1546	0.000838226	0.0031689
ATP6V0D2	3.11985	0.0807174	48.0223	4.21406e-12	9.51618e-11
FBXL21	3.11723	-0.0152758	14.8019	0.000119416	0.000564816
LOC102724942	3.11625	-0.783386	25.8374	3.71415e-07	3.18482e-06
AGXT	3.11615	0.298886	15.1208	0.000100848	0.000486753
CCKBR	3.11099	3.19773	86.3835	1.4822e-20	1.65979e-18
RAMP1	3.10316	5.29601	65.783	5.03395e-16	2.38786e-14
LOC101927159	3.10004	-1.19024	16.0579	6.14344e-05	0.000312966
KCNE3	3.0951	4.05352	57.2473	3.84322e-14	1.29466e-12
SLC10A4	3.09489	0.524221	40.6805	1.79263e-10	2.9988e-09
MIR3198-1	3.08457	-1.70842	5.61369	0.0178207	0.044185
PTPRT	3.07676	5.26828	61.4736	4.48715e-15	1.78466e-13
FPR1	3.07313	3.25298	31.2374	2.28322e-08	2.49194e-07
VCX3B	3.07133	0.404741	36.0031	1.97001e-09	2.69301e-08
LOC101928167	3.07077	-0.712194	11.7253	0.000616575	0.00241973
MLN	3.06972	-0.858618	12.6194	0.000381758	0.00158226
BNC2	3.06933	8.09826	97.0185	6.86842e-23	1.19462e-20
MIOX	3.0687	-1.32143	10.4235	0.00124422	0.00448261
GRM1	3.06768	4.29804	30.6418	3.10342e-08	3.30906e-07
RP5-968D22.3	3.06716	-1.73552	8.74379	0.00310659	0.00989299
NMNAT2	3.06551	5.09484	75.6071	3.46108e-18	2.43906e-16
CYP27B1	3.06223	3.62903	81.7878	1.5151e-19	1.38643e-17
HTR2C	3.06015	0.278205	10.7323	0.00105283	0.00386291
FATE1	3.05537	-0.191875	27.223	1.81292e-07	1.64788e-06
LINC00871	3.04475	0.312442	18.9005	1.37717e-05	8.29007e-05
AIPL1	3.03899	-0.498235	22.539	2.05925e-06	1.48664e-05
LINC00898	3.03695	0.775647	61.8932	3.62608e-15	1.46985e-13
SPDYC	3.03541	-1.41189	9.55614	0.00199282	0.00673624
WNT2	3.02731	2.383	47.4854	5.54144e-12	1.22101e-10
LOC100130417	3.02687	2.09686	42.7126	6.34017e-11	1.14077e-09
INSRR	3.02664	-0.560742	18.3741	1.81506e-05	0.000105907
NUDT10	3.02451	3.30303	108.468	2.1222e-25	5.7192e-23
OR2V2	3.01852	-0.711191	21.6029	3.35348e-06	2.3245e-05
LOXL2	3.01708	6.11515	102.528	4.25309e-24	9.34328e-22
EHMT2-2	3.01587	-1.28214	14.1578	0.000168102	0.000763859
KCNG4	3.0155	-1.27044	20.5817	5.71388e-06	3.75978e-05
LOC400499	3.01484	0.5714	19.7028	9.04668e-06	5.66984e-05
MIR548AQ	3.01356	-2.18986	9.66226	0.00188092	0.00641287
SPATA31E1	3.00074	0.772458	16.2596	5.52286e-05	0.00028439
GRIK3	2.99519	4.56682	35.5196	2.52492e-09	3.37078e-08
RP5-1024G6.5	2.99129	4.34595	55.572	9.00965e-14	2.80041e-12
CDC20B	2.98418	-1.4041	16.6323	4.5372e-05	0.00023847
ZNF556	2.98234	0.0504624	22.8582	1.74408e-06	1.27983e-05
CYP4F11	2.97995	4.37245	60.7529	6.47082e-15	2.46797e-13
LOC400622	2.97994	0.209401	24.1454	8.93306e-07	7.0374e-06
GPR161	2.97612	6.70971	197.707	6.61023e-45	5.40364e-41
LINC01115	2.97542	-1.07458	23.4814	1.26127e-06	9.55849e-06
MIR503	2.97058	-0.641998	23.1446	1.50266e-06	1.11942e-05
SLC16A3	2.96649	5.02734	117.631	2.08819e-27	9.48346e-25
TUBB3	2.96023	5.60132	95.3868	1.56597e-22	2.52656e-20
TCEAL5	2.9592	1.23676	62.0186	3.40223e-15	1.38829e-13
LOC440040	2.95717	-1.53808	18.0483	2.15373e-05	0.000122918
LOC100996478	2.95573	-1.9168	7.50627	0.00614847	0.0178402
LOC100132174	2.95129	-0.176992	24.694	6.71924e-07	5.43658e-06
CCL7	2.95059	-0.0193233	20.2458	6.81029e-06	4.39746e-05
LOC101928430	2.94844	-1.72944	22.0169	2.70265e-06	1.9113e-05
FPR2	2.93993	1.61482	13.4943	0.000239284	0.0010464
LCE3C	2.93883	2.03252	10.9714	0.000925312	0.00345679
KRT42P	2.93693	5.34934	49.0699	2.47e-12	5.8753e-11
LOC440173	2.93668	2.77557	115.014	7.81523e-27	3.0913e-24
ITLN1	2.93409	-0.501052	5.95321	0.0146905	0.0373996
OLIG1	2.92916	0.0871446	9.63867	0.00190523	0.00648311
LOC100128139	2.92771	-1.63824	12.7162	0.000362504	0.00150883
DNM1P35	2.92232	1.48278	76.2235	2.53305e-18	1.85933e-16
TMEM155	2.91721	0.526746	44.3953	2.68337e-11	5.13716e-10
HGFAC	2.91585	-0.634296	30.5828	3.19924e-08	3.40087e-07
TEKT1	2.91553	-0.697276	22.4822	2.12098e-06	1.5285e-05
GH2	2.91297	-1.95989	9.13399	0.00250904	0.0082177
ZNF695	2.91155	-0.0280193	42.2797	7.9109e-11	1.40077e-09
FEZF1-AS1	2.90436	-0.73741	10.9712	0.000925372	0.00345679
HSPB3	2.90281	2.69699	39.2374	3.75274e-10	5.86566e-09
DAND5	2.90113	-1.46227	12.9771	0.000315319	0.00133487
RNASE10	2.90028	-1.62068	14.5987	0.000133006	0.000621067
PYDC2	2.8992	-2.15194	7.57893	0.00590545	0.0172473
MED15P9	2.89598	0.110071	22.6428	1.95088e-06	1.41567e-05
UCP2	2.89525	7.48538	95.1264	1.78608e-22	2.84428e-20
DEFB103A	2.89161	-0.994742	8.38141	0.00379078	0.0117797
RP11-214L13.1	2.89079	-0.584467	9.96131	0.00159864	0.00557367
NCKAP5L	2.89053	6.15489	113.916	1.35925e-26	4.76202e-24
TMEM95	2.88904	-1.57029	7.11639	0.00763825	0.0214669
PRKAR1B	2.88796	6.05255	92.5676	6.50632e-22	9.84945e-20
GABRA5	2.88709	1.07789	27.8046	1.34203e-07	1.25236e-06
PCDHB8	2.88385	1.63441	40.5398	1.92653e-10	3.18975e-09
PCYT1B	2.87431	2.25822	66.5688	3.37891e-16	1.63763e-14
GPC4	2.87215	6.09626	114.227	1.16236e-26	4.31903e-24
GPR50	2.87212	-0.634097	6.25567	0.0123796	0.0324808
SLC7A8	2.86922	7.94378	121.867	2.46807e-28	1.28306e-25
WNT9A	2.86519	1.76179	46.5882	8.7588e-12	1.85014e-10
IL20	2.86498	1.49443	46.2346	1.04909e-11	2.17663e-10
PCDHGB1	2.86437	2.8206	27.7805	1.35886e-07	1.26613e-06
AC005062.2	2.86201	0.472287	30.4006	3.51428e-08	3.68466e-07
LOC100128076	2.85901	-1.48351	7.55848	0.00597285	0.0174192
ABI3BP	2.85514	8.76581	65.5634	5.62738e-16	2.64379e-14
LOC101927138	2.85414	-1.56828	5.4292	0.0198027	0.0483418
INHBC	2.85213	0.653328	66.6843	3.18656e-16	1.55362e-14
IGSF1	2.84955	3.11669	63.4476	1.64688e-15	7.17374e-14
RTBDN	2.84045	-1.39269	11.8794	0.000567569	0.00225155
BMS1P17	2.83813	-1.74699	17.6143	2.70547e-05	0.000150519
DLGAP3	2.83704	2.44756	48.1496	3.94908e-12	9.01743e-11
DPEP3	2.83369	-0.786751	11.7138	0.000620395	0.00243278
SEPT12	2.83131	-0.523186	10.7302	0.00105399	0.00386657
LOC102724973	2.83108	1.61802	70.1905	5.38449e-17	3.06379e-15
PCDHB17	2.83056	-0.527809	26.1303	3.19131e-07	2.7753e-06
NPHS1	2.82971	0.319537	11.6085	0.000656524	0.00255808
EPGN	2.82968	3.64691	26.5758	2.53402e-07	2.23943e-06
PCDH11Y	2.8288	-0.391513	17.6686	2.62925e-05	0.000146812
SLC6A1	2.82314	4.4655	35.7046	2.29618e-09	3.09575e-08
IQCA1	2.8227	3.50218	69.9635	6.04107e-17	3.39797e-15
TMEM132A	2.82182	5.8922	112.936	2.22798e-26	7.38366e-24
LINC00887	2.82018	0.159388	31.1491	2.38947e-08	2.59749e-07
SPEF1	2.81845	0.400722	37.3944	9.64972e-10	1.40029e-08
PDIA2	2.81115	0.803574	40.663	1.80877e-10	3.01963e-09
LOC102724855	2.80871	-1.25696	6.48898	0.0108545	0.0290101
GPR114	2.80777	2.25187	64.4409	9.94716e-16	4.47604e-14
LOC101929510	2.80657	-1.01618	15.6611	7.57682e-05	0.000376746
C11orf35	2.797	2.34613	33.7859	6.15234e-09	7.66666e-08
SULT1E1	2.79654	5.89918	56.7218	5.02046e-14	1.63944e-12
SORCS2	2.79415	5.28107	87.737	7.47641e-21	9.0768e-19
C1QL1	2.79067	1.05	45.4259	1.5852e-11	3.17092e-10
TEKT2	2.78891	1.06726	56.8075	4.8062e-14	1.57999e-12
XIRP1	2.78626	-0.224197	15.8741	6.76981e-05	0.000341049
CYP2A7	2.78331	-1.47603	10.7794	0.00102638	0.00377884
GJA3	2.78314	3.6529	81.0957	2.15049e-19	1.89707e-17
CACNA1B	2.77758	2.40269	23.0016	1.61865e-06	1.19637e-05
CDH8	2.76964	2.11881	52.8858	3.53508e-13	9.81814e-12
GOLT1A	2.76943	0.31234	49.4186	2.06777e-12	4.98623e-11
LOC102723450	2.76897	0.843565	21.2544	4.0218e-06	2.74202e-05
UBD-7	2.75773	-1.34109	6.86477	0.00879113	0.0242404
FUT5	2.75669	-0.682348	32.0909	1.47125e-08	1.6681e-07
LCE3A	2.7554	2.55634	19.5468	9.8166e-06	6.09783e-05
BANCR	2.75508	-0.516661	19.1069	1.23596e-05	7.53248e-05
FZD8	2.75292	5.62875	87.2958	9.34471e-21	1.10178e-18
LPPR3	2.75283	1.58647	20.1313	7.23053e-06	4.63464e-05
HAPLN1	2.75092	3.80021	22.2946	2.33863e-06	1.67355e-05
C3orf36	2.74632	1.0102	69.8057	6.5444e-17	3.65772e-15
C11orf53	2.74545	-1.38162	16.3868	5.16448e-05	0.00026754
IL17F	2.74462	-1.46656	9.81723	0.00172884	0.00596234
CYP26A1	2.7425	-0.63515	17.1997	3.36495e-05	0.000182814
TCL1B	2.74107	-0.482624	10.0245	0.00154474	0.00541343
RP11-219G17.4	2.73799	-0.850856	16.6016	4.61114e-05	0.000241772
BCL2A1	2.73521	2.95319	45.2054	1.77415e-11	3.52587e-10
COL26A1	2.73422	2.62227	33.2584	8.06924e-09	9.84033e-08
STAC2	2.72969	6.99201	50.1506	1.42391e-12	3.556e-11
FAM46D	2.72866	-1.98027	9.25662	0.00234645	0.00776472
DNAJC12	2.72838	1.25003	46.6727	8.38908e-12	1.78125e-10
TMEM8C	2.72604	-1.31662	6.34661	0.0117606	0.0310995
SLC6A1-AS1	2.72328	-0.676926	16.017	6.2776e-05	0.000319005
HPCAL4	2.72043	0.134864	27.2039	1.83088e-07	1.66052e-06
AC009120.4	2.71934	-1.78695	8.21332	0.00415839	0.0127699
IL19	2.71334	-0.381615	9.85371	0.0016949	0.00586092
LINC00911	2.71288	-1.51209	24.8175	6.30229e-07	5.12118e-06
HOXD13	2.70538	-0.130252	6.81719	0.00902843	0.0247832
SLITRK2	2.70399	5.66421	64.5267	9.52321e-16	4.30899e-14
ADAMTS17	2.70394	5.07347	91.6402	1.03957e-21	1.4652e-19
CHST2	2.70328	6.76799	57.624	3.17326e-14	1.08235e-12
SPRR2A	2.70306	6.91077	19.9986	7.74986e-06	4.93143e-05
FLJ44511	2.70088	1.92608	52.1526	5.13501e-13	1.38234e-11
SLC7A3	2.69773	0.596856	41.6718	1.07954e-10	1.87232e-09
BAI1	2.6971	7.02523	43.5998	4.02883e-11	7.50213e-10
LINC00520	2.69516	2.00696	20.6152	5.61493e-06	3.70561e-05
LINC00865	2.6915	3.24822	80.4712	2.94966e-19	2.53816e-17
OR3A2	2.68802	-1.55252	8.11267	0.0043957	0.0133897
ZSCAN10	2.68683	-1.82325	10.8234	0.00100226	0.00370171
LOC102724283	2.68551	-1.64333	6.53224	0.0105937	0.0284368
GABRR1	2.68488	0.686877	40.1985	2.29429e-10	3.73359e-09
CLEC17A	2.68436	-0.890889	14.8667	0.000115383	0.000548065
LRP2	2.68011	4.57739	19.7353	8.89425e-06	5.58531e-05
TMPRSS11A	2.67858	1.59384	11.8696	0.000570586	0.00226205
NXPH1	2.67242	-1.73488	15.3839	8.77318e-05	0.000429641
DKKL1	2.67169	0.429316	42.3749	7.53527e-11	1.34007e-09
C14orf180-2	2.6713	-0.152934	17.2374	3.2988e-05	0.000179644
LOC101929258	2.67075	-1.6011	8.09911	0.0044287	0.0134718
SYCP2L	2.66992	3.09185	51.5537	6.96659e-13	1.83314e-11
SERPINE1	2.66683	5.15752	82.7977	9.08962e-20	8.77613e-18
RP11-94H18.1	2.66237	-1.16967	16.0259	6.2482e-05	0.000317643
PIWIL2	2.65954	3.74015	42.5369	6.93618e-11	1.23982e-09
MMP12	2.65624	3.65313	22.8747	1.7291e-06	1.26959e-05
CHRD	2.65368	5.53921	53.6724	2.36863e-13	6.80987e-12
ANKRD45	2.65192	1.03839	31.4305	2.06708e-08	2.27323e-07
SOX18	2.6506	5.38631	55.0377	1.18238e-13	3.59314e-12
SCD5	2.64767	6.94031	85.6293	2.17038e-20	2.36562e-18
FNDC1	2.64716	5.54866	38.3947	5.77893e-10	8.6893e-09
DLL3	2.6464	-0.488123	25.894	3.60692e-07	3.10155e-06
PRSS45	2.64033	-0.770559	13.4681	0.000242648	0.00105873
EDIL3	2.64026	7.95904	59.5094	1.21713e-14	4.42863e-13
SNTG2-3	2.63967	-1.6721	11.4362	0.000720284	0.00277478
RP4-738P15.1	2.63916	-0.300857	28.8971	7.6327e-08	7.49337e-07
HEPH	2.63736	6.56575	98.769	2.83748e-23	5.23205e-21
FAM20C	2.6366	6.28703	88.8225	4.3187e-21	5.43138e-19
FAM41C	2.63007	3.37875	36.9068	1.23913e-09	1.76062e-08
GJB6	2.62968	9.43574	99.7313	1.74538e-23	3.37037e-21
MFAP2	2.6272	5.52235	83.1093	7.76381e-20	7.59762e-18
MARCKSL1	2.62321	7.49011	95.6814	1.3494e-22	2.26662e-20
MDK	2.61887	6.61053	81.6151	1.65347e-19	1.50184e-17
LOC101929690	2.60714	-1.69198	11.2415	0.000799877	0.00304221
OR4K14	2.6066	-2.29564	5.52416	0.0187556	0.0461577
ANP32C	2.60502	-1.12706	9.60436	0.00194116	0.00658709
LOC102724947	2.60423	-0.918687	7.50411	0.00615583	0.0178531
RP11-3B12.2	2.60385	-1.6268	16.275	5.4781e-05	0.000282356
PCDHA6	2.60231	0.372939	10.256	0.00136242	0.0048564
SLC25A47	2.6013	-1.78724	6.38008	0.0115408	0.0306041
PPAPDC1A	2.60098	3.8693	50.146	1.42725e-12	3.56071e-11
SLC6A13	2.60006	0.7492	17.5165	2.84818e-05	0.00015753
MIR1910	2.59601	-1.38797	9.1796	0.00244727	0.00804884
DSCR8	2.59567	-1.81239	5.8929	0.0152021	0.0385217
BCAM	2.59417	8.52114	72.4283	1.73214e-17	1.08365e-15
MT1F	2.59292	3.71841	83.5506	6.21055e-20	6.21664e-18
RP13-614K11.1	2.5914	-1.55656	12.7631	0.000353531	0.00147675
LOC101448202	2.5888	3.15959	43.8679	3.51295e-11	6.60672e-10
LOC102724156	2.58755	-1.13504	24.4564	7.60118e-07	6.06611e-06
VRTN	2.58652	-0.313836	16.4872	4.89803e-05	0.000255085
KIRREL3	2.58611	2.92903	33.1095	8.71099e-09	1.04926e-07
IQCF1	2.58543	-1.91599	12.6769	0.000370203	0.00153853
FAM171A2	2.58024	3.10465	73.5331	9.89651e-18	6.48936e-16
FRAS1	2.57749	6.24235	99.9193	1.58735e-23	3.08954e-21
AC002454.1	2.57726	1.04023	58.8233	1.72485e-14	6.08635e-13
CDK5R2	2.57526	-1.69385	5.44249	0.0196526	0.0480533
FAM132B	2.57293	-0.303672	35.8179	2.16645e-09	2.94512e-08
PYY	2.57288	-1.26431	24.7201	6.62883e-07	5.36802e-06
LOC101928845	2.5704	-1.70536	7.96541	0.00476798	0.014356
ELOVL2-AS1	2.56939	-1.63957	14.8261	0.000117895	0.00055833
APOA2	2.56892	-1.85243	6.63055	0.0100244	0.0270957
AQP10	2.56805	0.897706	35.8006	2.1858e-09	2.96343e-08
LINGO1	2.56644	4.88919	59.9144	9.90726e-15	3.66464e-13
NINL	2.56583	5.7815	140.03	2.62148e-32	2.72806e-29
SLC18A3	2.56563	1.24371	11.5036	0.00069462	0.00268604
TPO	2.55383	2.20717	24.7954	6.37503e-07	5.17551e-06
ADAP1	2.5481	4.34035	60.2969	8.15754e-15	3.04499e-13
SOX4	2.54723	7.73104	142.94	6.05782e-33	7.4281e-30
CREB5	2.54515	7.30391	90.6905	1.67995e-21	2.2762e-19
RAC3	2.54069	5.35317	40.0982	2.41517e-10	3.90954e-09
PTGS2	2.54056	5.84887	30.1899	3.91751e-08	4.06573e-07
PITX2	2.53777	3.58829	51.0852	8.84415e-13	2.28791e-11
TEX37	2.53503	-2.00226	12.4679	0.000414012	0.00170128
NBEAP1	2.53444	-0.915553	10.673	0.00108712	0.0039709
SERPINB4	2.53356	7.13318	19.0559	1.26944e-05	7.70585e-05
ADAD2	2.53142	4.30825	45.5823	1.46358e-11	2.95658e-10
MAFA	2.52542	0.40195	14.2397	0.000160942	0.000735957
KCNG1	2.52319	1.90701	50.7144	1.06832e-12	2.7206e-11
SORL1	2.51486	7.71717	117.219	2.57102e-27	1.12592e-24
NPTX2	2.5117	4.21949	49.2692	2.23142e-12	5.34407e-11
GAS2	2.50764	2.92498	55.5158	9.27103e-14	2.87207e-12
RP11-632K5.3	2.5052	-1.16762	16.3853	5.16845e-05	0.00026769
NRP2	2.5046	6.54393	84.8727	3.1821e-20	3.30669e-18
MMP9	2.50167	5.08216	49.5617	1.92231e-12	4.67221e-11
HUNK	2.50116	5.69705	99.7111	1.76326e-23	3.3783e-21
LOC101927576	2.50113	-1.44643	36.3268	1.6685e-09	2.31963e-08
ARL14	2.49734	0.565507	45.1945	1.78402e-11	3.54095e-10
CEACAM3	2.49682	-0.218882	14.6343	0.000130514	0.000610478
SOX11	2.4949	4.90693	24.0498	9.38776e-07	7.35309e-06
CLDN17	2.49479	0.735961	10.3035	0.00132777	0.0047486
C2CD4C	2.49461	2.18875	34.266	4.80696e-09	6.11442e-08
NPVF	2.49328	-1.38052	7.44053	0.0063771	0.0183998
LOC407835	2.49162	-1.55957	12.196	0.000478921	0.0019343
PHF21B	2.49002	-0.174895	13.5781	0.000228837	0.00100572
SHOX2	2.48919	5.19547	63.5809	1.53918e-15	6.7165e-14
FOXE1	2.48387	4.62818	81.5669	1.69432e-19	1.52401e-17
PSD	2.47947	3.87403	53.7328	2.29692e-13	6.61146e-12
METTL11B	2.47795	-1.33141	10.954	0.000933998	0.00348159
SSPO	2.47689	4.32318	45.0644	1.90662e-11	3.77081e-10
CHRNB2	2.4733	3.06842	116.079	4.56761e-27	1.89858e-24
GFRA3	2.47291	3.82298	53.9223	2.08574e-13	6.0718e-12
HAUS7	2.46906	6.27655	39.5619	3.17828e-10	5.03516e-09
LOC102724698	2.46656	-2.09363	11.5332	0.000683632	0.00265066
NCAM1-AS1	2.46215	0.546404	25.2962	4.91686e-07	4.09839e-06
KIAA1549	2.46197	5.26212	108.914	1.69477e-25	4.61806e-23
SLC6A12	2.45898	1.4345	44.3548	2.73938e-11	5.23213e-10
CDH22	2.4584	5.72884	56.8825	4.62639e-14	1.52702e-12
TRIM54	2.45657	-0.171663	15.7119	7.37575e-05	0.000367873
NPNT	2.456	6.79459	76.8302	1.86311e-18	1.39728e-16
PLAUR	2.4556	4.88351	63.2464	1.82401e-15	7.86099e-14
VCAN	2.45363	9.1471	50.0273	1.51619e-12	3.75967e-11
ZNF114	2.45048	1.67333	57.2072	3.9224e-14	1.31771e-12
NXF4	2.45034	-1.72534	7.53679	0.00604515	0.0175903
SNORD116-2	2.44994	-1.96817	6.73305	0.00946428	0.0258149
IL23A	2.4497	1.92068	60.5278	7.25468e-15	2.74558e-13
ANKRD13B	2.44835	5.13499	82.6787	9.65361e-20	9.28412e-18
LOC100506274	2.44685	-0.61136	12.2337	0.000469333	0.00189933
SULT1B1	2.44634	0.914171	13.7294	0.00021112	0.000936767
LOC102723985	2.44599	-0.616103	24.7863	6.40509e-07	5.19783e-06
LINC00661	2.43672	-1.42445	6.18883	0.0128559	0.0335289
SLC13A5	2.42423	0.739932	44.8895	2.08476e-11	4.09669e-10
LINC01002	2.42288	1.31322	37.2085	1.06149e-09	1.5286e-08
RFPL1S	2.41903	0.912593	28.5964	8.91464e-08	8.64804e-07
LOC102724096	2.4103	-1.54555	7.99338	0.00469488	0.014162
LOC101927229	2.40956	1.41096	15.365	8.86125e-05	0.000433495
CDH3	2.40824	8.08952	127.13	1.73962e-29	1.18507e-26
FLJ39080	2.40464	-0.720731	17.6491	2.65647e-05	0.000148197
ADAMTS20	2.4026	2.29619	12.5003	0.000406896	0.00167597
TNC	2.40103	8.80149	73.0371	1.27239e-17	8.12103e-16
MEGF6	2.39937	9.08957	59.5531	1.19041e-14	4.35075e-13
LOC102724637	2.39852	-1.59442	6.04544	0.0139422	0.0358143
ASB18	2.39703	-1.78915	7.51665	0.00611314	0.0177587
FAR2P3	2.39675	-1.52956	9.30378	0.00228681	0.00758579
LOC101927764	2.39613	0.497502	40.6385	1.83167e-10	3.05577e-09
ZNF469	2.39395	4.20883	43.191	4.96493e-11	9.10015e-10
C9orf92	2.39382	-1.65102	15.1231	0.000100722	0.000486337
HS3ST1	2.39112	2.4402	76.2461	2.50431e-18	1.84431e-16
SOCS1	2.38986	3.61968	65.2553	6.57982e-16	3.05613e-14
NUTM2F	2.38885	-1.30571	17.8816	2.35088e-05	0.000132688
COL4A2-AS1	2.38567	4.19283	73.7443	8.892e-18	5.89372e-16
LGR6	2.38534	5.69698	54.2504	1.76502e-13	5.24036e-12
TMEM151A	2.38263	-1.56707	12.6986	0.000365922	0.00152228
LOC101928620	2.38227	-1.41749	10.9784	0.000921818	0.00344561
ANKRD7	2.37958	-0.773203	41.2773	1.32095e-10	2.25907e-09
LINC00964	2.3777	4.02126	39.5266	3.23617e-10	5.11965e-09
BX255923.3	2.37757	-1.46761	6.51956	0.0106694	0.0286027
TSPAN18	2.37533	6.69922	111.354	4.95046e-26	1.55647e-23
GPR158	2.37327	2.31081	37.4843	9.2151e-10	1.34199e-08
RP11-166A12.1	2.3702	-1.7825	7.37782	0.00660333	0.0189581
DCC	2.37018	2.6959	23.1427	1.50414e-06	1.11984e-05
ITGB6	2.37006	5.66813	68.0433	1.59943e-16	8.27517e-15
TM4SF19-AS1	2.36753	0.133018	39.1475	3.92976e-10	6.10344e-09
SUMO1P1	2.36736	-0.7729	6.07823	0.0136858	0.0352516
RGMA	2.36562	6.36125	76.0543	2.75972e-18	2.00235e-16
PI3	2.36291	8.24438	16.7303	4.30883e-05	0.000227688
PCSK1N	2.3626	3.31991	43.2201	4.89147e-11	8.98565e-10
ARHGAP36	2.36052	-0.874893	15.7567	7.20333e-05	0.000360152
FOXD2	2.36001	1.35097	58.1536	2.42435e-14	8.40945e-13
LOC101929327	2.35295	1.38613	16.5247	4.80196e-05	0.000250613
KIF25-AS1	2.35273	-1.57342	7.6406	0.00570688	0.0167511
KRT8	2.35043	6.75897	38.5104	5.44638e-10	8.24487e-09
DNAJC5G	2.34957	-0.965447	9.47292	0.00208527	0.00701306
SCUBE3	2.34713	5.45932	35.3362	2.77426e-09	3.6796e-08
MORN5	2.34567	-1.79326	7.26905	0.00701529	0.0199609
TGFBR3L	2.34249	0.96132	26.2675	2.97251e-07	2.60071e-06
CREG2	2.34082	-0.277535	20.4027	6.27427e-06	4.08252e-05
DRD1	2.33763	1.94104	21.0605	4.45003e-06	3.00475e-05
APOBEC3A	2.33386	1.02235	27.8252	1.32785e-07	1.24102e-06
PCDHA7	2.33136	-1.02613	12.7476	0.000356475	0.00148727
NLRP12	2.32838	-0.554665	15.0836	0.000102853	0.000495142
DYDC2	2.32722	2.24979	24.5528	7.23003e-07	5.8058e-06
LINC00994	2.32547	-1.73418	7.99974	0.0046784	0.0141196
STMN1	2.31771	7.94341	82.8487	8.85805e-20	8.58635e-18
LOC101928038	2.31687	-1.92661	6.83555	0.00893614	0.0245684
ARID3C	2.31593	1.46791	27.1372	1.89517e-07	1.71312e-06
RFPL1	2.31509	-0.291049	26.6247	2.47065e-07	2.18895e-06
LINC00617	2.31463	0.650527	6.77726	0.00923265	0.0252505
GTF2IRD1	2.31261	6.92103	107.021	4.40572e-25	1.12548e-22
MAGED4B	2.30962	0.460884	39.6656	3.01386e-10	4.79325e-09
IL17A	2.30595	-1.37698	6.56456	0.0104029	0.0280008
HAPLN4	2.3053	0.477524	23.1257	1.51752e-06	1.12878e-05
BRSK1	2.30508	2.62708	56.6085	5.31814e-14	1.72973e-12
COL22A1	2.30423	2.5171	19.4056	1.05699e-05	6.52114e-05
VSIG1	2.30389	2.28353	86.8954	1.14417e-20	1.31119e-18
TMEM145	2.30308	1.04719	20.822	5.04002e-06	3.36329e-05
SHANK2	2.30301	4.24119	69.1077	9.32305e-17	5.09217e-15
FAM157A	2.30256	-0.0211461	37.8408	7.67586e-10	1.12923e-08
KC6	2.30215	2.74062	21.1567	4.2323e-06	2.87117e-05
CTXN1	2.29528	3.78498	33.6378	6.63891e-09	8.22151e-08
LOC100134040	2.29374	-0.669174	15.097	0.000102124	0.000492043
LOC101928457	2.29299	4.25089	8.45121	0.00364801	0.0113836
COL4A2-AS2	2.29076	2.24482	44.8234	2.15627e-11	4.21357e-10
PCAT5	2.28954	-0.598375	18.2238	1.96409e-05	0.000113629
BEX1	2.28761	1.62006	18.6151	1.59946e-05	9.47466e-05
GRIK1-AS1	2.28308	-0.449952	18.9487	1.34283e-05	8.10725e-05
FBN2	2.28206	4.42397	21.1818	4.17714e-06	2.8369e-05
RAG1	2.28075	2.63559	62.5602	2.58421e-15	1.08334e-13
PCDHB2	2.28062	3.58193	41.1156	1.43487e-10	2.43858e-09
KIAA1210	2.27997	-0.532615	8.10505	0.0044142	0.013436
CSF3R	2.27877	3.65457	23.4355	1.29171e-06	9.76506e-06
SULF1	2.27697	6.13288	28.0441	1.18579e-07	1.11676e-06
FAM71E2	2.27678	0.610021	23.1245	1.51844e-06	1.12912e-05
SIGLEC11	2.27653	-1.32901	6.14903	0.0131484	0.0341942
COL27A1	2.27599	8.08434	60.9689	5.79822e-15	2.24283e-13
SNAP25	2.27577	2.78675	38.2821	6.12219e-10	9.1773e-09
TUBBP5	2.2731	3.44395	38.0939	6.74206e-10	1.0039e-08
PLEKHG2	2.27133	5.68596	145.046	2.09849e-33	3.43089e-30
ENKUR	2.27088	0.367176	58.7084	1.82861e-14	6.42478e-13
COL4A2	2.26989	8.13297	73.6923	9.12944e-18	6.03478e-16
DCDC5	2.26886	0.594611	30.1225	4.05595e-08	4.20051e-07
LINC01060	2.26844	-1.62818	16.0672	6.11344e-05	0.000311502
LOC102725035	2.26258	-1.13587	13.0572	0.000302127	0.0012857
TSNAXIP1	2.26148	2.63807	44.8266	2.15281e-11	4.21017e-10
TRIM67	2.25788	2.01958	14.5664	0.000135307	0.00063025
PRSS50	2.25282	0.644855	15.8103	7.00194e-05	0.000351085
BIN1	2.25238	5.94398	57.0979	4.14646e-14	1.38353e-12
DUSP9	2.25107	0.850859	28.0521	1.18092e-07	1.11303e-06
ARMS2	2.25076	-0.136053	26.7362	2.33217e-07	2.07676e-06
ELOVL2	2.24995	1.93924	34.1286	5.15867e-09	6.51112e-08
PP12613	2.24988	-1.45219	16.0078	6.30834e-05	0.000320368
LINC01021	2.24966	-0.0419991	6.99296	0.00818308	0.0227841
LOC101928517	2.24939	-0.739186	38.4046	5.74964e-10	8.65587e-09
ENTPD6	2.24335	6.70142	97.6743	4.93172e-23	8.76416e-21
DUSP10	2.2426	5.45922	107.175	4.07604e-25	1.06341e-22
ZNF385C	2.23479	3.37375	72.4712	1.6949e-17	1.06306e-15
LOC101926889	2.23391	0.0929092	18.1058	2.08961e-05	0.000119901
LOC101929575	2.23384	-0.914903	12.7258	0.000360639	0.0015026
WISP1	2.23238	4.57611	39.1557	3.91327e-10	6.08555e-09
GRAMD1B	2.23111	3.48434	50.8478	9.9815e-13	2.56053e-11
NID1	2.22484	7.0751	62.191	3.1171e-15	1.28046e-13
DRD2	2.22431	3.0594	19.4761	1.01866e-05	6.3089e-05
IL11	2.22427	1.84919	44.2829	2.84188e-11	5.41104e-10
DBN1	2.22189	6.99061	106.913	4.65176e-25	1.17608e-22
TMEM150B	2.2215	-0.210744	20.0689	7.47015e-06	4.76954e-05
LINC00634	2.22128	-1.19336	11.7577	0.000605906	0.00238243
PHEX-AS1	2.21902	-1.38093	13.9087	0.000191912	0.000859153
EMBP1	2.2174	2.08825	54.0539	1.95067e-13	5.71544e-12
LOC102723823	2.21621	-1.0768	25.6153	4.16731e-07	3.5363e-06
LHFPL1	2.2135	0.0663572	34.8484	3.56402e-09	4.62456e-08
ANKRD30BL	2.2135	-0.4988	9.27916	0.00231776	0.00768014
FOXE3	2.21227	-1.51506	15.5743	7.93241e-05	0.000392444
EDN1	2.21187	5.83848	80.822	2.46988e-19	2.14792e-17
CXCL3	2.21178	0.261706	19.3914	1.06486e-05	6.56473e-05
GS1-279B7.1	2.21128	-1.86404	6.12818	0.0133044	0.0344937
PCDHB12	2.21081	2.65185	54.0869	1.9182e-13	5.62701e-12
LEF1	2.21042	5.2527	79.3053	5.32171e-19	4.37952e-17
KIF3C	2.21025	4.74388	137.371	1.0003e-31	9.43517e-29
TEX22	2.20944	1.11977	38.1554	6.5328e-10	9.75109e-09
SLC11A1	2.20736	3.45901	31.3611	2.14232e-08	2.35071e-07
CPZ	2.20713	5.40748	36.6082	1.44421e-09	2.03201e-08
ZAN	2.20691	1.08111	13.8143	0.000201793	0.000898961
PCDHB5	2.2068	2.39202	30.4257	3.46896e-08	3.64494e-07
GJB2	2.20623	9.80445	64.2107	1.11802e-15	4.97611e-14
SERPINA1-2	2.20442	0.175212	11.4144	0.000728769	0.00280306
DPP4	2.20357	6.1103	49.432	2.05365e-12	4.95706e-11
LOC101060391	2.20321	1.75246	20.6656	5.46892e-06	3.61899e-05
SOBP	2.20219	4.3634	52.5165	4.2665e-13	1.17169e-11
AC011899.9	2.20147	0.114859	29.601	5.30779e-08	5.36555e-07
C2orf71	2.20042	1.94733	33.5647	6.89309e-09	8.50761e-08
SOSTDC1	2.19736	7.1797	52.05	5.41039e-13	1.44379e-11
FOXD2-AS1	2.19603	2.01604	70.6402	4.287e-17	2.49726e-15
CCL4-3	2.19434	-1.03467	8.02195	0.00462138	0.0139575
FLJ20464	2.19421	0.544864	47.6167	5.18242e-12	1.14602e-10
C11orf35-2	2.19354	3.71644	29.409	5.86055e-08	5.86629e-07
DNAH14	2.19272	4.52788	35.0919	3.14499e-09	4.13126e-08
LYPD1	2.19092	2.64653	53.5322	2.54386e-13	7.27954e-12
CA9	2.1898	4.20931	31.8423	1.67215e-08	1.87592e-07
RP11-214C8.2	2.18977	-1.21431	6.14066	0.0132108	0.0342946
SLC16A9	2.18958	3.2045	52.3229	4.70844e-13	1.28157e-11
LGALS9B	2.18795	1.33072	39.3752	3.49719e-10	5.49424e-09
PCDHA4	2.18673	-0.400409	14.7008	0.000125993	0.000592382
AC079145.4	2.18668	-0.553886	33.8258	6.02756e-09	7.53031e-08
IRX2	2.18373	7.30649	73.9824	7.88182e-18	5.31026e-16
HTRA4	2.18154	-0.841829	13.4528	0.000244635	0.00106605
LOC728392	2.18103	5.73858	49.0384	2.50996e-12	5.94682e-11
LOC254896	2.17908	-1.31562	6.1071	0.013464	0.0348229
PELI2	2.17842	6.95689	80.934	2.3338e-19	2.04723e-17
CERS1	2.17805	0.929365	43.1757	5.00379e-11	9.16453e-10
MIR4435-1HG	2.17744	2.79976	52.1897	5.03906e-13	1.36099e-11
FAM224B	2.17742	-1.13649	10.6312	0.00111193	0.00404943
LOC102723407	2.1769	-0.976967	8.30271	0.00395859	0.0122237
LOC644554	2.17386	1.09318	48.6902	2.99764e-12	7.00802e-11
TNFAIP6	2.17345	3.12002	32.2324	1.3679e-08	1.56292e-07
C3orf65	2.17035	-0.636606	10.2875	0.00133933	0.00478592
RP11-576I22.2	2.17028	-0.771623	19.5462	9.81947e-06	6.09807e-05
LEMD1	2.17015	-0.810078	16.4559	4.97945e-05	0.00025905
SPAG17	2.1686	4.54032	44.4858	2.56211e-11	4.92809e-10
NOX4	2.16636	2.89546	56.2189	6.48358e-14	2.07306e-12
LINC00939	2.16571	-0.915722	6.65219	0.00990343	0.02681
CD177	2.1652	1.84067	17.6312	2.68147e-05	0.000149388
KCNAB3	2.1647	3.95449	62.11	3.24805e-15	1.3298e-13
UPP1	2.16441	4.58879	45.441	1.57306e-11	3.1492e-10
FGF12	2.16338	2.38812	35.4665	2.59469e-09	3.45827e-08
MYO3B	2.16251	3.83327	45.2875	1.70132e-11	3.38662e-10
TRIM46	2.16176	1.60398	58.7773	1.7657e-14	6.22155e-13
SLCO1B1	2.16172	-1.39798	7.64012	0.00570842	0.0167516
CLEC4D	2.15996	-0.269954	13.7702	0.000206585	0.000917973
AFAP1-AS1	2.15813	2.64442	36.9134	1.23497e-09	1.75573e-08
LOC102724641	2.15572	-1.3274	13.2882	0.000267078	0.00115091
MNX1	2.15457	-0.238536	9.59713	0.00194882	0.00660853
FCGR2A	2.15326	4.81887	26.6533	2.4344e-07	2.1584e-06
LOC101928191	2.15319	-0.958869	9.06035	0.00261211	0.00851614
KCNJ3	2.15147	0.888667	6.50723	0.0107437	0.0287608
COL4A1	2.15018	7.92805	57.042	4.26599e-14	1.41568e-12
LOC101929388	2.14765	0.615249	30.8115	2.84354e-08	3.05925e-07
DKFZP434A062	2.14714	-1.49343	8.74077	0.00311173	0.0099055
GPR3	2.14669	0.334592	59.1973	1.4263e-14	5.10638e-13
RCOR2	2.14459	2.38855	52.171	5.08716e-13	1.37247e-11
HOXC-AS3	2.14316	0.709679	20.2983	6.62596e-06	4.2886e-05
ERAS	2.14244	-0.577266	14.9321	0.000111449	0.000531641
LOC100128364	2.14227	-1.20905	11.2115	0.000812935	0.0030847
ZNF610	2.1411	2.48375	72.1281	2.01676e-17	1.25213e-15
LOC284240	2.13412	-1.38279	9.40749	0.00216101	0.0072222
LOC102723804	2.13395	-1.69141	10.1709	0.00142675	0.00505557
CSMD1	2.13386	3.18982	16.9873	3.76303e-05	0.000201891
SEMA3B	2.13375	5.84739	40.0986	2.41465e-10	3.90954e-09
CYP24A1	2.13062	2.12364	28.2297	1.07736e-07	1.02289e-06
FUT6	2.1306	-0.339634	12.3216	0.000447747	0.00182401
SLAMF9	2.12703	-0.898617	21.2027	4.13179e-06	2.81077e-05
COL5A2	2.12684	8.3921	49.0402	2.50772e-12	5.94682e-11
GUCA1A	2.1256	-0.921495	9.7957	0.0017492	0.00602323
GLIS2	2.12548	0.199506	38.1229	6.64261e-10	9.89693e-09
ZBTB8B	2.12535	-0.942528	12.5315	0.000400146	0.00165122
WNK4	2.12207	3.67892	26.9965	2.03819e-07	1.83336e-06
LINC00866	2.11629	-0.96381	23.4863	1.25808e-06	9.53729e-06
IGFL1	2.11621	4.01254	17.8052	2.44718e-05	0.000137743
SYT10	2.11288	-0.238921	7.36306	0.00665774	0.0190909
MIR650	2.11266	2.36478	5.79982	0.0160278	0.0403516
CBX2	2.1124	4.87826	87.4549	8.6223e-21	1.02647e-18
LOC100134423	2.11109	-1.98393	8.3967	0.00375902	0.0116899
DPYSL5	2.10971	1.66146	6.14665	0.0131661	0.0342258
LOC102723455	2.1094	-1.42585	10.7147	0.00106287	0.00389684
MIXL1	2.10918	-0.4449	24.929	5.94797e-07	4.86227e-06
RP4-669L17.10	2.10831	0.146371	34.9771	3.33611e-09	4.3588e-08
C6orf165	2.10755	0.823034	70.7116	4.13459e-17	2.42576e-15
CHRNB4	2.1047	0.909183	36.7004	1.37749e-09	1.94482e-08
LOC388780	2.10187	-0.0257771	36.5571	1.48256e-09	2.08238e-08
PCNT	2.0982	7.54784	59.0502	1.53704e-14	5.47087e-13
SMS	2.09752	6.9958	101.741	6.32623e-24	1.36092e-21
CHRNA5	2.09698	2.63324	79.2594	5.44685e-19	4.44596e-17
OR10H1	2.09677	-2.07603	6.09417	0.0135628	0.0350195
SPOCD1	2.09662	1.56724	21.1976	4.14275e-06	2.81509e-05
ANKLE1	2.09617	1.55776	54.4932	1.55987e-13	4.65381e-12
PXDN	2.09574	6.63242	53.1456	3.09723e-13	8.68766e-12
KCNJ5	2.09369	3.07913	45.9752	1.19762e-11	2.45919e-10
GRIK1-AS2	2.08998	0.794586	32.9348	9.53025e-09	1.13732e-07
SMKR1	2.0893	1.33785	41.4395	1.21578e-10	2.08793e-09
BHLHA15	2.08763	-1.11887	10.8898	0.000966976	0.0035925
NYAP1	2.08392	2.79367	42.705	6.36504e-11	1.14273e-09
LOC102723953	2.08365	-0.480357	20.5782	5.72458e-06	3.7648e-05
LOC101928462	2.08329	-0.0781497	17.8038	2.44897e-05	0.00013778
SMARCD3	2.08275	6.20082	51.2665	8.06384e-13	2.10157e-11
LOC100131372	2.08123	2.13902	36.2518	1.73403e-09	2.39714e-08
PANX2	2.07991	2.13236	52.2856	4.79886e-13	1.30329e-11
ATP4B	2.07985	-1.37177	14.3679	0.00015034	0.000692253
CCDC155	2.07966	-0.97864	5.76123	0.0163836	0.041125
TDRD5	2.07938	2.7938	23.9775	9.74671e-07	7.60752e-06
TREM1	2.07913	3.18245	10.3882	0.00126823	0.00455841
SRD5A2	2.07813	1.52867	20.8594	4.94263e-06	3.30551e-05
SYT3	2.07418	-0.926121	10.3952	0.00126341	0.00454375
HPN	2.07228	2.41153	16.2594	5.52336e-05	0.00028439
A3GALT2	2.06815	-1.47183	12.5842	0.000389017	0.00160935
GREM1-2	2.0674	1.07478	14.9299	0.000111581	0.00053217
ZCCHC12	2.06518	-1.77213	14.0127	0.000181584	0.000819651
DNM1	2.06358	6.13038	77.5792	1.27508e-18	9.83335e-17
VAT1L	2.06125	2.39732	23.7635	1.08927e-06	8.40834e-06
TRIML2	2.05885	-1.33507	5.84453	0.0156255	0.0394889
LOC101928683	2.05808	-0.292727	8.2501	0.00407497	0.0125499
PCDHB9	2.05723	2.72728	64.9971	7.50073e-16	3.43828e-14
RHCG	2.05683	5.81388	14.8921	0.000113841	0.000541472
LOC102724105	2.05649	1.68155	43.8965	3.46213e-11	6.51614e-10
MAGED4	2.05478	0.350436	23.8806	1.02501e-06	7.9649e-06
PCDHA1	2.05389	-1.00016	5.87432	0.0153633	0.0388904
GREM1	2.05335	0.931587	11.7517	0.000607861	0.00238791
SLC7A5	2.04939	8.20585	72.6685	1.53366e-17	9.69367e-16
TSPYL5	2.04865	5.75795	100.274	1.32727e-23	2.625e-21
LINC00602	2.04645	-0.810933	18.4855	1.71199e-05	0.000100683
ETV3L	2.0437	-1.37897	11.4949	0.000697874	0.0026982
OIT3	2.04366	-1.37745	15.4825	8.32744e-05	0.000409591
SHROOM2	2.03982	5.82161	69.9787	5.99468e-17	3.37962e-15
XKR5	2.03824	0.179543	36.4719	1.54886e-09	2.16065e-08
AC011738.4	2.03784	0.526063	37.817	7.77026e-10	1.14175e-08
LOC101926961	2.03674	-1.36372	14.8066	0.00011912	0.000563523
ZNF300	2.03658	5.02506	64.373	1.02961e-15	4.62455e-14
HAP1	2.03472	3.22706	20.1351	7.21615e-06	4.62842e-05
RP11-286B14.1	2.03387	1.03718	25.794	3.79873e-07	3.25166e-06
S100A9	2.0336	10.6882	14.5948	0.000133281	0.000622234
CPA6	2.03346	-1.56267	6.73402	0.00945914	0.0258066
C5AR1	2.0328	2.99706	31.8476	1.66757e-08	1.8725e-07
LOC101928281	2.03229	4.83695	57.7195	3.02287e-14	1.03827e-12
TIGD3	2.03211	0.399147	40.5728	1.8943e-10	3.14528e-09
TMEM151B	2.0319	1.13515	19.7914	8.63726e-06	5.43686e-05
FAM43B	2.03183	0.195354	32.4895	1.1984e-08	1.39155e-07
FLJ22184	2.03171	2.57472	23.4518	1.2808e-06	9.68561e-06
MUM1L1	2.02997	1.97289	29.8207	4.73906e-08	4.83849e-07
LOC101927955	2.02985	-0.73629	21.3972	3.73309e-06	2.56372e-05
UCN	2.02838	0.842316	27.5819	1.50584e-07	1.38884e-06
SLC5A5	2.02755	-0.333937	7.64332	0.00569829	0.0167299
GALNT15	2.02643	4.96751	33.1245	8.64416e-09	1.04274e-07
LOC101927608	2.02553	-0.729929	26.2367	3.02028e-07	2.63686e-06
RP11-521B24.3	2.02486	1.1607	55.2056	1.08558e-13	3.31955e-12
TENM2	2.0236	7.09061	63.4216	1.66881e-15	7.2531e-14
ASIC4	2.02289	0.287444	15.6738	7.52587e-05	0.000374522
SCN2B	2.01626	2.70932	51.5336	7.03825e-13	1.85001e-11
LOC101928245	2.0161	-0.683781	13.375	0.000255	0.00110443
KRT17	2.01486	12.3033	36.5296	1.50363e-09	2.10715e-08
DEFB126	2.01385	-1.58996	11.142	0.000843936	0.00318852
FCGR3A	2.01255	4.18554	28.8688	7.74485e-08	7.59435e-07
GABRR2	2.00789	-0.179981	17.5864	2.74548e-05	0.000152607
AC091878.1	2.00711	-1.11831	16.6017	4.61099e-05	0.000241772
C6orf48-5	2.00613	1.94592	37.15	1.09382e-09	1.56595e-08
GNG4	2.00567	3.1181	23.8329	1.05072e-06	8.14151e-06
COL18A1	2.00429	8.97822	59.3936	1.29085e-14	4.66915e-13
LOC101927725	2.00297	-0.824702	19.9061	8.134e-06	5.15315e-05
C19orf38	2.00185	1.11297	23.3558	1.34634e-06	1.01219e-05
LPCAT1	2.00153	1.47701	49.8244	1.68141e-12	4.13174e-11
ECEL1	2.00114	0.0656005	30.6444	3.09927e-08	3.3075e-07
LEF1-AS1	1.99832	2.15355	47.597	5.23496e-12	1.15555e-10
CNTNAP2	1.99762	-0.983015	7.41044	0.00648466	0.0186808
LOC100507156	1.99729	2.50252	31.9509	1.58119e-08	1.78368e-07
LOC339260	1.99596	-0.570415	7.64282	0.00569987	0.0167325
GRM4	1.99362	1.06672	12.2802	0.000457796	0.00185693
LOC101928588	1.99219	2.85921	64.8247	8.18665e-16	3.71795e-14
RIMS4	1.99077	2.35841	15.5359	8.09531e-05	0.000399295
TRNAI2	1.98971	-0.848145	36.4169	1.59319e-09	2.2187e-08
LOC100133985	1.98904	-0.837122	12.2522	0.00046471	0.00188217
FARP1	1.98787	6.71367	126.52	2.36655e-29	1.5273e-26
LINC01134	1.98581	-0.0235576	28.2345	1.07472e-07	1.02077e-06
ADAMTS14	1.98502	4.70738	25.9374	3.52677e-07	3.03689e-06
FAAH	1.98401	6.02327	39.3474	3.54724e-10	5.56931e-09
ABCB11	1.98284	1.65212	16.515	4.82674e-05	0.000251693
ARHGAP33	1.9817	5.25171	39.2667	3.69694e-10	5.78212e-09
KIF7	1.98107	4.26023	82.6034	1.00283e-19	9.59567e-18
AL121656.5	1.97986	-1.34526	10.2579	0.00136103	0.00485214
LOC102723635	1.97952	-0.350802	12.3003	0.000452894	0.00184039
PDLIM7	1.9783	6.64389	64.9746	7.5871e-16	3.45848e-14
RP11-417E7.2	1.97671	0.549048	18.9508	1.34131e-05	8.10002e-05
PROKR1	1.97628	-1.5055	7.97735	0.00473662	0.0142704
KIAA0040	1.9758	6.65564	70.0814	5.69063e-17	3.2156e-15
DIRAS1	1.9757	3.51898	47.3737	5.86652e-12	1.28571e-10
COL5A1	1.97539	8.32705	45.2997	1.69076e-11	3.36834e-10
LOC101927023	1.97504	-0.0114459	10.5038	0.00119132	0.00430849
KRT16	1.97473	10.7677	20.4323	6.1778e-06	4.02295e-05
ST8SIA5	1.97415	-0.563306	18.8173	1.43856e-05	8.62151e-05
UGT2B17	1.97335	-0.75574	7.51606	0.00611514	0.0177624
CRYL1	1.97016	5.58483	68.4905	1.2749e-16	6.84148e-15
KALRN	1.96875	6.50749	56.4961	5.63093e-14	1.82181e-12
SMTNL2	1.96823	1.31224	16.714	4.3459e-05	0.000229498
RP11-438N16.1	1.96735	-1.21354	10.4174	0.00124834	0.00449613
SDS	1.96658	0.882413	33.0132	9.15332e-09	1.09554e-07
ITGA4	1.9657	5.01446	93.1821	4.76986e-22	7.40355e-20
FOLR3	1.96549	-0.849413	12.7599	0.000354124	0.00147897
C10orf82	1.96391	1.22768	20.0327	7.61294e-06	4.85187e-05
PDE7A	1.96346	6.32351	98.0251	4.13119e-23	7.50469e-21
KLK13	1.96333	6.11522	19.0848	1.25034e-05	7.61252e-05
RGS4	1.96266	2.19468	23.8665	1.03253e-06	8.0137e-06
LOC101928431	1.96115	2.44346	27.5826	1.50526e-07	1.38883e-06
BCMO1	1.9582	1.03896	18.9007	1.37704e-05	8.29007e-05
TMEM98	1.95621	6.30525	68.2599	1.43308e-16	7.55802e-15
MYOD1	1.95558	-2.0569	7.22308	0.00719722	0.0203934
TREH	1.95374	-0.468303	17.9092	2.31702e-05	0.000130953
KISS1R	1.95184	-1.19872	9.46676	0.00209229	0.00703086
WDR93	1.95183	0.571112	25.5216	4.37468e-07	3.68803e-06
CNTNAP2-2	1.95181	-1.58037	10.7149	0.00106274	0.00389684
MYOZ1	1.95136	1.43488	31.4869	2.00787e-08	2.21583e-07
TM4SF19	1.95123	-1.41293	15.524	8.14625e-05	0.000401565
DNAAF1	1.9511	2.45452	35.0652	3.18841e-09	4.1859e-08
BGN	1.95092	9.25498	55.3366	1.01562e-13	3.12509e-12
S100A8	1.95038	10.3983	15.3676	8.84923e-05	0.000432998
MLLT11	1.94994	4.18208	65.8708	4.81477e-16	2.29997e-14
LOC730668	1.94938	0.740903	18.8517	1.41284e-05	8.47983e-05
PCDP1	1.94635	0.635203	18.9156	1.36631e-05	8.23682e-05
CAPN9	1.94406	0.0368654	19.9455	7.96823e-06	5.05596e-05
AC005592.2	1.94337	-1.74327	16.758	4.24638e-05	0.000224738
SFTPA2	1.94308	-1.66464	12.5943	0.000386915	0.00160147
LOC101928897	1.94197	-0.790749	5.57794	0.0181881	0.0449417
PTCHD2	1.94192	-0.352657	13.1112	0.000293536	0.00125434
DMBT1	1.94166	2.27201	18.9574	1.33669e-05	8.07653e-05
CDH24	1.94113	4.55653	77.1936	1.54992e-18	1.17678e-16
DNASE2B	1.9407	-1.63474	7.76589	0.0053242	0.0157816
ADCYAP1	1.94045	2.49162	21.469	3.59589e-06	2.47712e-05
FCGR1A	1.93909	1.49104	29.0774	6.95438e-08	6.8881e-07
MTVR2	1.93901	-1.7553	8.75563	0.00308648	0.00984174
COL6A3	1.93877	9.36759	41.3115	1.29806e-10	2.22302e-09
GPR45	1.93876	-1.24376	13.1524	0.000287153	0.00122964
FAIM3	1.93854	3.16677	52.163	5.10791e-13	1.37655e-11
RP11-122M14.1	1.9383	-1.74002	7.84424	0.00509828	0.0152068
MAGEE2	1.9343	0.067074	20.0692	7.46909e-06	4.76954e-05
SDC2	1.93381	7.56417	79.6982	4.36195e-19	3.65094e-17
LOC102723758	1.93149	-1.44263	9.89661	0.00165584	0.0057461
LOC100506747	1.92779	-1.72853	6.57041	0.0103688	0.0279188
BASP1	1.92769	5.88212	102.347	4.66014e-24	1.01137e-21
WFIKKN2	1.92524	1.7377	18.5833	1.62638e-05	9.62022e-05
CHRM3-AS1	1.9228	-1.60314	9.01576	0.00267661	0.00869881
PCDHA11	1.92151	-0.454337	10.1531	0.00144059	0.00509945
VSTM5	1.92141	-0.949058	19.6068	9.51321e-06	5.92588e-05
LINC00545	1.92008	-1.1423	12.8641	0.000334953	0.00140765
KIF5A	1.91963	1.8298	18.1299	2.06334e-05	0.000118616
LEFTY1	1.91748	-0.322065	20.1739	7.07121e-06	4.54678e-05
RNASE2	1.91729	-0.855429	15.7302	7.30475e-05	0.000364628
PLEK	1.91689	4.90625	25.5325	4.34994e-07	3.67348e-06
SLC22A2	1.91525	-1.14073	9.77475	0.00176925	0.00608543
CNGB1	1.91382	1.68511	14.3254	0.000153779	0.00070623
H1FNT	1.91279	-1.56632	12.0916	0.000506485	0.0020319
LINC00673	1.91271	5.6762	89.5926	2.92619e-21	3.75821e-19
SLC1A4	1.91104	7.26594	79.2687	5.42106e-19	4.44596e-17
LOC101928109	1.91086	-1.55822	14.6862	0.000126972	0.000596641
SLC38A5	1.90919	6.21259	50.1345	1.43558e-12	3.57423e-11
CERKL	1.90912	3.54839	100.617	1.11612e-23	2.28098e-21
POU6F2-AS2	1.90858	0.352844	6.35021	0.0117367	0.0310498
PCDHB10	1.90788	2.9164	69.7548	6.71536e-17	3.7429e-15
CLEC18B	1.9043	-0.321971	13.1694	0.000284552	0.00121978
MROH7	1.90399	0.921191	19.6108	9.49319e-06	5.91653e-05
C20orf96	1.90354	3.92266	67.2874	2.34676e-16	1.1842e-14
SOX30	1.90276	-0.617356	19.4124	1.05323e-05	6.50122e-05
NXF3	1.89986	-1.32557	7.29555	0.00691257	0.0197075
CDH15	1.89961	-0.0701562	10.4891	0.00120081	0.00434025
GLIS2-2	1.89961	1.38039	48.0322	4.19281e-12	9.49442e-11
VASH2	1.89779	3.83929	66.7441	3.09145e-16	1.51387e-14
LOC101927896	1.89656	-1.18883	21.1011	4.35672e-06	2.94743e-05
FOXD1	1.89633	1.8416	20.2883	6.66073e-06	4.30997e-05
C1orf74	1.89582	4.08189	53.1365	3.1116e-13	8.71106e-12
MBOAT1	1.89579	5.19475	65.8675	4.82286e-16	2.29997e-14
DYRK3	1.89487	2.84074	103.045	3.27649e-24	7.37181e-22
CSF2	1.89434	-0.991258	14.769	0.000121515	0.000573413
HOXC-AS2	1.89337	-0.253806	26.2196	3.04719e-07	2.65752e-06
RP11-536I6.1	1.89277	-0.649279	11.3827	0.000741318	0.0028451
AC007099.1	1.8912	-0.983447	6.13003	0.0132905	0.0344687
AC007750.5	1.88913	3.37651	32.8474	9.96825e-09	1.17983e-07
LOC101928235	1.88817	0.112002	25.5761	4.25265e-07	3.59628e-06
KCNQ4	1.88703	3.12826	34.6091	4.03014e-09	5.18276e-08
SH2B2	1.88683	3.61433	25.6141	4.16991e-07	3.53729e-06
MKRN3	1.88449	0.542156	15.8596	6.82201e-05	0.000343256
MAMSTR	1.88441	2.2714	30.6282	3.12525e-08	3.33088e-07
WNT5A	1.88143	6.51072	57.0848	4.17428e-14	1.38901e-12
HAS3	1.87909	7.21181	100.022	1.5074e-23	2.9574e-21
LOC101928310	1.87755	-2.129	6.41149	0.0113384	0.0301423
LOC101928717	1.8772	4.21702	36.0553	1.91797e-09	2.6292e-08
TSPAN4	1.87719	6.34698	48.0792	4.09355e-12	9.30402e-11
KCNIP1	1.87539	1.41659	16.9648	3.80794e-05	0.000203989
KCNH4	1.87521	-0.504293	5.92655	0.0149144	0.0378869
FZD7	1.87431	7.223	68.4344	1.31169e-16	7.02356e-15
SLC39A7-2	1.87319	1.72203	19.3907	1.06525e-05	6.5655e-05
SLC26A10	1.87264	2.90248	48.5954	3.1461e-12	7.32021e-11
HTRA1	1.87256	8.40373	48.2193	3.81127e-12	8.74347e-11
LOC102723577	1.87069	-2.16428	7.30097	0.00689175	0.0196555
LOC101927071	1.8693	-0.408518	22.8876	1.71757e-06	1.26226e-05
DIO2-AS1	1.8688	1.75604	24.5887	7.09678e-07	5.70821e-06
GJB7	1.86805	-0.277441	13.1011	0.000295119	0.00126001
CDKN2A	1.86587	2.788	45.386	1.61785e-11	3.23359e-10
RP3-399L15.3	1.86548	0.00537186	54.1365	1.8703e-13	5.49968e-12
LOC101928083	1.86448	0.821457	51.293	7.95569e-13	2.07559e-11
PCDHA2	1.86287	-0.4335	9.81488	0.00173105	0.00596744
LOC101928765	1.86265	-0.574206	9.67794	0.00186493	0.00636808
LOC101927260	1.85947	0.549846	32.8704	9.85101e-09	1.16765e-07
E2F5	1.85929	3.77299	104.401	1.65256e-24	3.82335e-22
IGLL5	1.85922	8.27208	6.40934	0.0113522	0.0301724
LOC100652930	1.85905	0.502196	19.3299	1.09969e-05	6.75743e-05
BACH2	1.85871	5.76155	58.975	1.59688e-14	5.66741e-13
REEP2	1.8571	2.96281	38.989	4.26192e-10	6.59012e-09
ADAMTS8	1.85641	2.10487	33.0454	9.00303e-09	1.07966e-07
EVA1A	1.85633	3.51011	55.217	1.07929e-13	3.30445e-12
DYNAP	1.85547	-0.673714	10.8672	0.000978806	0.00362914
FGF20	1.85454	-1.22293	11.2608	0.000791611	0.00301413
IL31RA	1.85382	3.72126	34.0191	5.45747e-09	6.86002e-08
PCDHB16	1.85325	4.03704	50.3496	1.28655e-12	3.23603e-11
LOC100505920	1.85291	-0.753514	18.0857	2.11185e-05	0.000121012
SLC6A11	1.85177	4.47078	27.9703	1.2319e-07	1.15752e-06
KIAA1211	1.85163	2.807	26.8679	2.17849e-07	1.95054e-06
LOC101927583	1.85121	0.844097	29.9663	4.39625e-08	4.52618e-07
ULBP2	1.84864	0.865031	21.6063	3.34754e-06	2.32169e-05
UHRF1	1.84593	4.44266	68.1167	1.54099e-16	8.00664e-15
FBXL2	1.84526	3.96939	79.2558	5.45683e-19	4.44596e-17
PAFAH1B3	1.84476	5.21092	81.769	1.52959e-19	1.39449e-17
BLACAT1	1.8441	0.349619	21.5089	3.52191e-06	2.42958e-05
PRR19	1.84392	3.74558	59.6666	1.12369e-14	4.13153e-13
CHRNA6	1.84113	-0.898902	14.7831	0.00012061	0.000569583
ARHGEF16	1.83999	4.68279	32.7326	1.0575e-08	1.24683e-07
HRK	1.83927	-1.03481	11.0656	0.000879426	0.00330884
MFSD2B	1.83891	-0.354004	17.7389	2.53387e-05	0.000142101
CAMK2N2	1.83811	-0.00276662	23.9888	9.68992e-07	7.57284e-06
LRIG3	1.83799	7.93444	92.1922	7.86538e-22	1.16903e-19
TERT	1.83782	0.185451	16.1574	5.82909e-05	0.00029844
SPRY4	1.83291	4.92429	49.1254	2.4011e-12	5.73365e-11
KCNS3	1.83174	5.3126	58.4899	2.04341e-14	7.14873e-13
CASC14	1.83024	2.47048	12.4507	0.000417833	0.00171583
ZNF663P	1.82999	-1.20564	11.6893	0.000628592	0.00245941
PLXDC1	1.82993	6.00697	70.7364	4.08279e-17	2.40689e-15
CTRC	1.82951	-0.446028	11.1794	0.000827102	0.00313264
RHBDL3	1.8295	2.69505	28.5652	9.0596e-08	8.76786e-07
TMEM240	1.82937	1.27645	32.4214	1.24115e-08	1.43711e-07
SPHK1	1.82845	5.58195	48.3755	3.51941e-12	8.14245e-11
NLRP3	1.82728	1.98859	26.216	3.05279e-07	2.66145e-06
PLAU	1.82726	6.367	46.8183	7.78833e-12	1.66522e-10
ITGAX	1.82639	4.1729	28.9994	7.24022e-08	7.14524e-07
FAP	1.82387	5.0212	28.4842	9.44681e-08	9.09237e-07
RP11-527H14.2	1.8238	0.490094	7.40644	0.00649907	0.018714
CYP2D6	1.82276	-0.331987	16.6148	4.57915e-05	0.000240469
DHDH	1.82116	0.166395	25.0972	5.45127e-07	4.49821e-06
BMS1P18	1.82084	-2.10406	5.44622	0.0196107	0.0479637
NKAIN4	1.81897	0.211755	14.3166	0.000154499	0.000709138
LOC101928796	1.81502	-0.0370047	24.9802	5.79232e-07	4.74769e-06
LOC401098	1.81486	-1.41396	8.20094	0.00418686	0.0128445
C19orf45	1.81152	-0.408608	12.7843	0.000349544	0.00146209
LOC102723356	1.81138	0.438747	14.8202	0.000118259	0.000559775
ADC	1.81116	3.39031	78.4509	8.20114e-19	6.5513e-17
LOC339593	1.8093	0.546712	13.3613	0.000256869	0.0011118
SPERT	1.80746	-0.204077	21.8506	2.94732e-06	2.06869e-05
LCP2	1.80743	4.69663	25.597	4.20698e-07	3.56577e-06
TPTE2P6	1.80676	0.130153	10.9058	0.000958642	0.00356478
GDPD5	1.80642	4.31046	46.7236	8.174e-12	1.73708e-10
PI15	1.80634	4.13987	33.9429	5.67535e-09	7.10839e-08
C1QTNF1	1.80617	6.39153	46.9828	7.16137e-12	1.54328e-10
TFPT-8	1.80615	-0.465881	15.0706	0.000103566	0.000498008
LOC101928602	1.80522	-1.83737	11.9178	0.000556012	0.00220927
GJC1	1.80448	4.55032	62.2913	2.96227e-15	1.22507e-13
GABRD	1.80362	0.250919	22.7778	1.81857e-06	1.32853e-05
ZSCAN1	1.80308	0.924162	14.7973	0.000119708	0.000565868
CEACAM5	1.80286	3.66727	14.512	0.000139271	0.000646504
PYY2	1.80224	-1.10391	17.3705	3.07559e-05	0.00016872
PCDHGA5	1.80197	1.7844	20.4993	5.96541e-06	3.90747e-05
TOX	1.80152	3.72325	56.977	4.40947e-14	1.46132e-12
ACPL2	1.80093	4.8843	69.6786	6.97992e-17	3.86062e-15
RP11-162J8.2	1.80056	1.44716	30.5693	3.22153e-08	3.42012e-07
LOC101928193	1.80043	-0.291738	10.3427	0.00129988	0.00465922
TCTE1	1.79974	0.336344	17.5166	2.84803e-05	0.00015753
LOC101929819	1.79928	0.437102	19.4274	1.04499e-05	6.45453e-05
MBOAT7-8	1.79803	-0.914929	12.095	0.000505559	0.00202885
NRIP3	1.79757	1.97659	47.7074	4.94821e-12	1.10318e-10
CXCR1	1.79646	2.2426	12.4148	0.000425954	0.00174619
RHBDL1	1.79567	3.03947	23.9955	9.65635e-07	7.549e-06
ADAM11	1.79439	3.03831	28.9466	7.43997e-08	7.3188e-07
SPATC1	1.79294	-0.552712	11.5507	0.000677245	0.00262963
TEAD2	1.78863	5.24819	104.374	1.67473e-24	3.83843e-22
LOC102724595	1.78717	-1.33536	13.1025	0.000294903	0.00125931
C4orf26	1.78707	-0.442955	10.704	0.00106906	0.00391483
OSBPL7	1.78683	3.58886	50.5342	1.17105e-12	2.97296e-11
AC007386.2	1.78669	-1.47108	6.33953	0.0118076	0.0312069
C21orf37	1.78534	0.148297	19.1825	1.18797e-05	7.25984e-05
LOC101929396	1.78438	0.24453	15.7332	7.29324e-05	0.000364127
FOXR1	1.78384	-1.82154	9.92597	0.00162963	0.00567027
KCNG3	1.78173	0.162864	8.75251	0.00309176	0.00985218
TGIF2	1.77936	5.20029	86.9132	1.13388e-20	1.30551e-18
CHKA	1.77699	5.32978	54.9753	1.22053e-13	3.69741e-12
RP6-191P20.4	1.77698	0.446416	28.6725	8.57132e-08	8.33809e-07
LOC102724248	1.77684	0.167602	10.9586	0.00093169	0.0034751
SLCO2A1	1.77526	6.63944	57.8873	2.77579e-14	9.57435e-13
RARRES2	1.77511	6.31236	27.5407	1.53827e-07	1.41768e-06
RARA	1.77423	6.22245	107.026	4.39264e-25	1.12548e-22
XAGE2	1.77176	-0.34382	7.46764	0.00628177	0.0181582
PCDHB7	1.7715	2.28219	23.1389	1.50709e-06	1.1217e-05
GPR37L1	1.77007	-1.23683	7.36302	0.00665788	0.0190909
ARL15	1.76969	6.23854	73.5581	9.77193e-18	6.42485e-16
NEDD4L	1.7672	5.97003	100.379	1.2585e-23	2.50923e-21
DIRAS2	1.7663	1.89233	41.4581	1.20424e-10	2.07103e-09
LOC102724689	1.7661	-1.09683	8.13296	0.00434678	0.0132654
NETO2	1.76044	4.25491	34.7537	3.74159e-09	4.8396e-08
LOC100996535	1.75865	-0.564024	20.4213	6.21342e-06	4.044e-05
INHBA-AS1	1.75817	-1.01743	12.8145	0.000343945	0.00143989
LAMC2	1.75762	7.57446	60.3769	7.83285e-15	2.9417e-13
RP11-328K4.1	1.75754	0.259571	21.6977	3.19177e-06	2.22435e-05
TM6SF2	1.75603	-0.136779	23.4521	1.28064e-06	9.68561e-06
SYNPO	1.75509	7.25477	83.159	7.57136e-20	7.4871e-18
PCDHGC5	1.754	1.1518	23.1017	1.53658e-06	1.14157e-05
LOC102724615	1.75363	-0.70441	13.3563	0.000257555	0.00111418
LOC644919	1.75329	0.417791	5.73037	0.016674	0.0417599
YJEFN3	1.75268	3.40481	28.4231	9.74942e-08	9.35425e-07
C2orf62	1.75153	-0.709959	15.3383	8.9878e-05	0.000439126
SHISA2	1.75096	4.16566	26.1086	3.22747e-07	2.80179e-06
PCDHGB2	1.75025	2.63799	23.9819	9.72445e-07	7.59498e-06
BNC1	1.74996	6.79883	76.2182	2.53986e-18	1.85933e-16
LUM	1.74897	8.50279	26.3122	2.90445e-07	2.54389e-06
LINC01122	1.74862	-0.0320643	21.3032	3.92068e-06	2.67904e-05
LOC102724394	1.74791	-1.00639	18.7784	1.46819e-05	8.77978e-05
COL6A1	1.74511	9.89969	44.9273	2.04488e-11	4.02477e-10
KIRREL3-AS3	1.745	-1.46012	6.44336	0.0111368	0.0296641
SH2D6	1.74371	-1.41998	8.19972	0.00418969	0.0128499
FAM20A	1.74339	4.28626	54.8511	1.30019e-13	3.91717e-12
GAK	1.74188	7.62914	45.9869	1.19044e-11	2.44919e-10
DPEP1	1.74126	1.37355	11.766	0.000603228	0.00237304
LUCAT1	1.74071	0.837423	10.3729	0.00127878	0.00459137
LINC00629	1.73968	-0.605784	14.6157	0.000131815	0.000615973
LILRB4-5	1.73907	-0.908985	9.19796	0.00242285	0.00798306
LOC100506731	1.73848	2.55346	40.1688	2.32937e-10	3.78314e-09
BEND5	1.73785	2.64956	75.5165	3.62364e-18	2.53903e-16
GS1-24F4.2	1.73738	-0.846498	17.4809	2.90208e-05	0.000160078
HTR7	1.73487	0.888097	14.5799	0.000134343	0.000626476
CORO6	1.73259	4.11495	25.895	3.60507e-07	3.10105e-06
APBA2	1.73161	-0.0333242	25.1285	5.36348e-07	4.43323e-06
SIRPB1	1.7288	1.2908	14.7777	0.00012096	0.000571016
DFNA5	1.7269	3.54649	57.1547	4.02849e-14	1.34965e-12
LOC729224	1.72544	0.644049	24.2213	8.58789e-07	6.77855e-06
SEZ6L2	1.72518	3.25574	28.3345	1.02062e-07	9.73162e-07
STARD4-AS1	1.72448	5.3711	71.7318	2.46527e-17	1.51905e-15
GADD45G	1.72435	5.45185	25.4193	4.61283e-07	3.86884e-06
RP11-10N16.2	1.72346	-1.42541	10.5801	0.00114312	0.00415256
PCSK4	1.72334	1.76309	23.6198	1.17372e-06	8.97548e-06
RNFT2	1.72253	1.12677	28.1567	1.11881e-07	1.05815e-06
C1orf228	1.7218	1.94875	23.1955	1.46336e-06	1.0928e-05
ACRV1	1.7217	-0.1036	29.8489	4.67053e-08	4.77648e-07
PIF1	1.72044	2.47465	39.2126	3.80079e-10	5.9332e-09
SHCBP1	1.71971	5.13992	37.3833	9.70509e-10	1.4075e-08
OR1G1	1.71954	-2.11298	7.5476	0.006009	0.017508
BCAR3	1.71636	5.64823	73.4587	1.02764e-17	6.72049e-16
ICAM5	1.71591	1.10405	14.6397	0.000130145	0.000609101
ADAMDEC1	1.71591	2.3165	17.0393	3.66147e-05	0.000196873
LOC101928554	1.71583	0.0199155	12.8402	0.000339252	0.00142268
AC010524.2	1.71582	-0.38306	16.6652	4.45913e-05	0.00023477
ALOX12P2	1.71558	3.36452	29.9201	4.50213e-08	4.62742e-07
FAM161A	1.71467	3.50456	61.543	4.33186e-15	1.7302e-13
DTX3	1.71381	5.44485	47.2706	6.18328e-12	1.34551e-10
INHBE	1.71184	2.15972	15.2841	9.249e-05	0.000450702
DNMT3A	1.71079	6.02394	155.802	9.35188e-36	2.54828e-32
FSTL3	1.70911	5.62411	54.3466	1.6807e-13	5.0082e-12
PCDHB6	1.70822	2.14347	23.2604	1.41481e-06	1.0588e-05
TICRR	1.70793	3.30569	86.5951	1.33179e-20	1.5191e-18
GRP	1.70681	0.898025	10.8437	0.000991342	0.00366803
AC095067.1	1.70617	-0.684494	7.55724	0.00597695	0.017427
FN1	1.70517	10.092	18.6437	1.57569e-05	9.35407e-05
LINC00176	1.70483	2.06991	32.1366	1.43703e-08	1.63308e-07
C11orf95	1.70216	5.48418	88.4623	5.18118e-21	6.41733e-19
LOC101929484	1.70155	0.691728	28.6147	8.83083e-08	8.57014e-07
PCDHB11	1.70142	2.35959	24.5605	7.20135e-07	5.78467e-06
SPEG	1.70114	5.42961	40.0956	2.41837e-10	3.91214e-09
AKR1B15	1.70023	2.04897	15.9794	6.40355e-05	0.000324397
COX6B2	1.69807	1.9147	21.125	4.30285e-06	2.9142e-05
LOC101928505	1.6974	-1.10554	8.11895	0.00438048	0.0133471
RBM20	1.69727	3.43538	21.3596	3.80708e-06	2.60868e-05
AC007966.1	1.69703	0.135335	24.5105	7.39053e-07	5.92112e-06
LOC102723877	1.69479	0.0680542	29.7643	4.87903e-08	4.9628e-07
LOC101928841	1.6931	0.55599	13.7532	0.000208465	0.000925655
PCDHGB3	1.69241	1.92663	14.7985	0.000119631	0.000565719
ATP8A2	1.69235	3.47197	26.5235	2.60347e-07	2.29419e-06
ISM1-AS1	1.69095	0.250126	5.62438	0.0177124	0.0439431
LINC00491	1.68739	0.0370177	6.9135	0.00855476	0.0236764
PGF	1.6858	4.68651	35.5138	2.53245e-09	3.37899e-08
USP6	1.6848	2.83736	13.9659	0.000186156	0.000837303
KLK6	1.68463	6.9693	12.7827	0.000349846	0.00146285
HEPHL1	1.68192	4.62084	14.7314	0.000123963	0.000583702
RP11-319E12.1	1.68136	-1.83568	7.80438	0.00521196	0.0155016
BOK	1.67898	7.23178	42.2051	8.21852e-11	1.45105e-09
CTNNA2	1.67576	-0.00609405	9.5021	0.00205236	0.00691756
LOC102724231	1.67452	-1.83354	7.32477	0.00680105	0.0194234
GABBR1	1.67427	-1.33107	11.5606	0.000673624	0.00261972
TNFRSF10C	1.67403	0.605317	12.8718	0.000333577	0.00140272
SERPINH1	1.67312	7.47415	56.2504	6.38056e-14	2.04278e-12
LOC102723636	1.67298	-1.86296	8.90751	0.00284001	0.00914621
RP11-1124B17.1	1.67038	-1.22918	12.3662	0.00043718	0.0017866
LOC100287098	1.66992	2.56633	70.9381	3.6861e-17	2.19413e-15
KIF20A	1.66936	4.30645	73.2744	1.12821e-17	7.24297e-16
WNT7B	1.6683	6.46315	34.8967	3.47668e-09	4.5184e-08
CDH11	1.66785	6.57756	36.721	1.36304e-09	1.92775e-08
ACVR2B-AS1	1.6678	1.69016	49.7013	1.79025e-12	4.38165e-11
SALL2	1.66627	3.96071	92.1151	8.17788e-22	1.20092e-19
HSF2BP	1.66614	0.61656	44.7577	2.22987e-11	4.347e-10
GPR39	1.66531	2.48656	38.5909	5.22621e-10	7.92625e-09
FLJ42351	1.6647	-1.23776	15.6992	7.42561e-05	0.000370065
CNIH2	1.66345	2.61384	33.6471	6.6072e-09	8.19186e-08
CCHCR1-3	1.65995	-0.018526	11.3911	0.000737961	0.00283486
DCDC1	1.65785	-1.24285	9.88837	0.00166326	0.00576861
LINC00638	1.65695	0.917728	29.4353	5.78141e-08	5.7918e-07
KRT19	1.65587	6.21289	10.9317	0.000945327	0.00352061
THSD7B	1.65584	2.13693	10.8615	0.000981838	0.00363835
GDF6	1.65577	0.117513	13.1117	0.000293452	0.0012542
CST2	1.65479	-0.760976	6.44203	0.0111451	0.0296832
LOC102723682	1.65201	-0.164894	28.4865	9.4355e-08	9.08862e-07
UST	1.65132	5.73478	46.1697	1.0844e-11	2.2461e-10
GABRB2	1.64828	1.4216	10.9647	0.000928649	0.00346639
VNN2	1.64778	1.55633	9.49316	0.00206239	0.00694658
CCNA1	1.64755	1.03856	17.457	2.93877e-05	0.000161956
RASL11B	1.64693	3.43287	42.3138	7.7743e-11	1.37957e-09
PROB1	1.64576	2.35844	41.9696	9.27058e-11	1.62394e-09
MCIDAS	1.64505	-0.748259	15.2084	9.62764e-05	0.000466986
FAM169A	1.64433	4.03849	70.6881	4.18415e-17	2.44898e-15
VPS37D	1.64344	2.44885	23.5726	1.20289e-06	9.16712e-06
TDRP	1.64324	5.86324	59.2535	1.38611e-14	4.99163e-13
LOC101929272	1.64293	0.906614	51.5653	6.92565e-13	1.82432e-11
COL6A2	1.64275	9.78324	40.4129	2.05578e-10	3.38136e-09
LOC728728	1.64093	-0.581893	22.6665	1.92699e-06	1.40064e-05
CCDC173	1.64053	0.124935	32.4179	1.24336e-08	1.43831e-07
PLCE1	1.63963	4.68852	33.0729	8.8768e-09	1.06661e-07
PCDHGA4	1.63961	1.72731	16.0937	6.02827e-05	0.000307927
RP5-1033H22.2	1.63958	2.22635	43.282	4.73935e-11	8.7521e-10
KIFC1-4	1.63909	-0.0730548	14.548	0.000136636	0.00063553
RP11-75N4.2	1.63907	3.13736	41.6527	1.09017e-10	1.88809e-09
AEBP1	1.63836	8.44239	53.921	2.08715e-13	6.0718e-12
PNMA2	1.63789	2.36697	29.1512	6.69459e-08	6.63883e-07
LOC100129617	1.63644	-0.258951	12.4914	0.000408835	0.00168311
SLC16A2	1.6364	4.70263	71.1888	3.24622e-17	1.94172e-15
TMEM158	1.63581	2.96307	30.8269	2.82107e-08	3.03838e-07
PRSS21	1.63357	1.54964	11.0523	0.00088576	0.00332961
SAMD5	1.63241	5.57423	38.651	5.06766e-10	7.72881e-09
KLK12	1.63149	2.15195	8.85458	0.00292355	0.00937339
PILRA	1.63133	2.56742	48.0268	4.20438e-12	9.50305e-11
DIO2	1.6312	8.04389	43.4518	4.34526e-11	8.07296e-10
PFN2	1.63095	6.18203	78.6397	7.4535e-19	6.03266e-17
ZNF239	1.63047	2.20018	59.2386	1.39664e-14	5.01481e-13
CASS4	1.62938	1.9469	12.4794	0.000411473	0.00169226
FLRT2	1.62924	6.82825	63.1542	1.91137e-15	8.18055e-14
CACNA2D3-AS1	1.62909	-0.635156	12.5594	0.000394224	0.00162924
LOC102723766	1.62829	-1.40108	6.25507	0.0123838	0.0324884
ORAI2	1.62687	4.80409	80.2705	3.26503e-19	2.78995e-17
CLEC18A	1.62604	-0.890044	10.9888	0.000916641	0.00342887
ZIM2	1.62505	-1.60349	5.37278	0.0204533	0.0496828
LOC101928801	1.624	1.0915	13.6869	0.000215954	0.000955795
C7orf61	1.62399	0.518802	16.8541	4.03662e-05	0.000214645
SYNDIG1	1.62209	1.57722	19.4431	1.03644e-05	6.40891e-05
EOMES	1.62075	1.00679	19.3358	1.09634e-05	6.74021e-05
ZNF454	1.6207	1.58675	37.3489	9.87773e-10	1.42915e-08
IRX4	1.62041	5.90585	33.0791	8.84859e-09	1.06426e-07
LOC101928325	1.62016	-1.39809	10.3093	0.00132358	0.00473447
IER3-5	1.61951	1.66531	6.7056	0.00961104	0.0261462
TCAM1P	1.61808	0.293691	9.45008	0.00211139	0.00708225
C1orf94	1.61772	-0.545825	6.92051	0.00852128	0.0235944
CASP5	1.61751	-0.918575	13.3309	0.000261073	0.00112801
LINC01001	1.61725	0.959574	30.0336	4.24629e-08	4.38652e-07
TRABD2B	1.61706	3.79917	32.7013	1.07464e-08	1.26339e-07
TUSC3	1.61609	6.0227	95.6059	1.40191e-22	2.31803e-20
LOC101927680	1.61441	-1.14461	7.80084	0.0052222	0.0155254
PPP1R26-AS1	1.61179	1.86027	24.4134	7.77249e-07	6.18872e-06
RAB34	1.61168	6.34831	54.2156	1.79658e-13	5.30834e-12
GCM2	1.61078	-1.482	5.99521	0.0143448	0.0366756
EFCAB12	1.60977	1.0894	10.7994	0.00101533	0.00374378
LOC102724731	1.60949	0.497999	23.0225	1.60117e-06	1.18417e-05
PRKX	1.60807	6.92524	76.8433	1.85075e-18	1.39226e-16
LRRC43	1.60704	0.497818	24.2678	8.38285e-07	6.62951e-06
LOC101593348	1.60591	-0.901099	12.0439	0.000519628	0.00208055
VWA5B2	1.6059	-0.622276	12.5586	0.000394387	0.00162964
BLM	1.60575	3.02773	79.4524	4.93994e-19	4.09281e-17
TNRC6C	1.60532	6.08713	62.959	2.11057e-15	8.98603e-14
PRDM8	1.60513	2.87652	14.6362	0.000130383	0.000610095
TGM3	1.60481	7.82384	19.5975	9.55962e-06	5.95026e-05
ATHL1	1.60431	5.6911	19.0317	1.28564e-05	7.7915e-05
ZNF853	1.6039	3.94349	42.6046	6.70002e-11	1.19848e-09
ETNK2	1.60375	4.25174	63.1832	1.88344e-15	8.07509e-14
LOC101928745	1.60368	2.73192	30.6097	3.15511e-08	3.35978e-07
GPR137C	1.60098	1.70376	43.2626	4.78639e-11	8.81242e-10
UCP3	1.60082	2.32142	31.0075	2.57029e-08	2.78295e-07
NUDT11	1.60027	3.21627	42.2628	7.97944e-11	1.41087e-09
MMP14	1.60008	8.41513	44.4261	2.64148e-11	5.06247e-10
KRT6A	1.59852	11.2026	13.6283	0.000222807	0.000982225
C10orf55	1.59719	4.60505	34.0052	5.49657e-09	6.89856e-08
PARK2	1.59701	3.94184	31.5084	1.98575e-08	2.19462e-07
LIPG	1.59593	5.04865	38.9923	4.25474e-10	6.58318e-09
LOC101929560	1.59567	-0.98796	9.82863	0.00171816	0.00592966
S100A7	1.59553	9.77777	11.5185	0.000689064	0.00266792
ADAMTS6	1.59514	4.09974	22.3686	2.25023e-06	1.615e-05
IDO1	1.59487	2.7098	15.5542	8.01725e-05	0.000396162
C21orf88	1.59466	0.621691	18.3878	1.80207e-05	0.000105274
CLCN1	1.59443	-0.811985	8.97046	0.00274379	0.00888769
LOC101928143	1.59326	-1.26728	7.33619	0.00675798	0.0193252
NOS2	1.59318	0.12177	19.3953	1.06268e-05	6.55298e-05
DSC2	1.59311	8.08864	36.6003	1.4501e-09	2.03912e-08
FHOD3	1.59233	5.36252	55.5241	9.23218e-14	2.86595e-12
LINC00482	1.59219	1.00652	20.2171	6.91321e-06	4.45805e-05
TMEM51-AS1	1.59218	4.5209	38.441	5.64333e-10	8.51149e-09
COL8A1	1.59197	3.08394	13.9691	0.000185838	0.000836392
NAT14	1.59091	3.78382	53.9339	2.07346e-13	6.04633e-12
PDE4B	1.59089	5.39322	22.9917	1.62706e-06	1.20187e-05
DERL3-2	1.58918	-0.366491	5.97956	0.0144726	0.0369483
NLRP6	1.58773	-0.890164	9.96627	0.00159434	0.0055634
ISG15	1.58668	4.15349	25.8784	3.63619e-07	3.12124e-06
LOC102724196	1.58628	0.732915	6.24543	0.0124514	0.0326552
FAM87A	1.58606	0.37704	28.4854	9.44057e-08	9.08993e-07
ACVR1	1.58587	6.0639	99.5202	1.94174e-23	3.66302e-21
FHL2	1.58585	6.49841	78.7335	7.10813e-19	5.77218e-17
ADAMTS7P1	1.58573	-2.08189	6.78635	0.00918576	0.0251447
HAPLN2	1.58447	-0.298785	10.8084	0.00101039	0.0037295
TNFRSF21	1.58433	5.57607	49.09	2.44479e-12	5.82664e-11
LOC646903	1.58421	0.52779	21.78	3.05769e-06	2.13943e-05
KIF23	1.58369	4.53201	70.6084	4.35659e-17	2.52579e-15
NAP1L3	1.58296	3.28897	44.2699	2.86077e-11	5.43856e-10
SRSF12	1.5829	2.199	48.6723	3.02506e-12	7.06539e-11
CXXC4	1.5818	1.61259	19.3537	1.08607e-05	6.68206e-05
ZNF775	1.58069	3.22969	89.1934	3.58036e-21	4.52601e-19
GPR173	1.58026	2.69798	36.1143	1.86076e-09	2.55648e-08
HTRA3	1.57828	4.86123	23.6306	1.16714e-06	8.93349e-06
PLCE1-AS1	1.57729	0.304613	15.0113	0.00010687	0.000512291
CD300E	1.57719	2.29722	15.9621	6.46219e-05	0.00032676
PSD3	1.57547	7.14546	56.1285	6.78869e-14	2.15655e-12
MEIG1	1.57437	-0.354814	22.79	1.80699e-06	1.32164e-05
CTSL	1.57243	6.54054	44.7227	2.27014e-11	4.422e-10
TNS3	1.57238	7.25996	74.0363	7.66946e-18	5.18143e-16
LINC00152	1.57195	3.19182	34.4041	4.47787e-09	5.73447e-08
GAP43	1.57027	0.863361	19.3005	1.11676e-05	6.85715e-05
LAMB1	1.57001	8.6639	77.3138	1.45844e-18	1.11423e-16
GRIA1	1.56972	3.03805	13.8503	0.000197961	0.000883009
CRABP1	1.56932	3.6338	25.4997	4.42449e-07	3.7249e-06
SPATA24	1.56885	2.0153	82.0434	1.33129e-19	1.24139e-17
LOC400685	1.56708	0.289343	24.5402	7.27752e-07	5.8382e-06
ANXA3	1.56567	5.57198	36.4828	1.54019e-09	2.14978e-08
CACNA2D2	1.56509	4.61434	32.5648	1.15286e-08	1.34376e-07
ISYNA1	1.56273	5.40166	40.9586	1.55488e-10	2.62797e-09
LOC101927426	1.56045	-0.718427	5.48155	0.0192182	0.0471307
LOC102723373	1.55913	-0.887002	9.84016	0.00170743	0.00589925
TACC3	1.55894	5.20969	82.0307	1.3399e-19	1.24469e-17
LOC284412	1.55862	0.00269268	20.7915	5.12093e-06	3.40987e-05
ZNF697	1.55803	4.23659	65.1142	7.06816e-16	3.2644e-14
LOC102723974	1.55741	-1.16472	7.19845	0.00729667	0.020637
DAPK1	1.55625	5.90384	65.8703	4.81592e-16	2.29997e-14
AGBL2	1.55519	1.74626	31.5026	1.99172e-08	2.20023e-07
KLHL5	1.55508	6.17404	75.0643	4.5564e-18	3.16547e-16
LINC00240	1.55423	1.17022	23.6384	1.16245e-06	8.90039e-06
AC073133.1	1.55397	-1.10929	9.52912	0.00202237	0.00682303
LINC00618	1.55158	-1.09081	15.6822	7.49275e-05	0.000373025
TLX2	1.55138	-1.58863	5.9094	0.0150603	0.0382061
IRS1	1.55038	6.22101	73.4353	1.03991e-17	6.76442e-16
HPD	1.54993	-0.745196	7.58065	0.00589982	0.0172349
CDK20	1.54856	3.74737	44.7024	2.29381e-11	4.45747e-10
ZSCAN23	1.5484	0.983054	13.5208	0.000235935	0.0010336
UGT2A1	1.54832	2.29149	7.99948	0.00467908	0.0141196
RP11-234K24.3	1.54801	-0.704747	6.93564	0.0084495	0.0234248
C10orf99	1.5473	4.62719	9.50882	0.00204487	0.00689325
NRXN3	1.5432	4.06325	30.4302	3.4609e-08	3.63802e-07
RASSF7	1.54269	3.45116	18.6368	1.58135e-05	9.38098e-05
FTH1P3	1.54117	-0.670775	9.14087	0.00249962	0.00819364
TSPAN12	1.54085	4.46487	22.7734	1.82273e-06	1.33117e-05
RPLP0P2	1.53969	0.920862	16.4325	5.04124e-05	0.00026182
DCSTAMP	1.53908	-0.801268	5.76968	0.016305	0.040957
CDC25C	1.53811	2.52279	58.3929	2.14666e-14	7.48859e-13
SOCS2-AS1	1.53605	-0.179907	25.7946	3.79742e-07	3.25166e-06
PTK7	1.53548	7.37592	74.9579	4.8086e-18	3.33125e-16
EIF4EBP1	1.53496	4.50331	42.8868	5.79995e-11	1.05206e-09
DSG2	1.53483	7.22031	56.1317	6.7776e-14	2.15582e-12
LIN7A	1.53405	0.94573	9.61328	0.00193175	0.00656525
TCF7L1	1.53189	5.28418	57.7021	3.04982e-14	1.04607e-12
OVOS2	1.52869	1.3334	10.2465	0.00136943	0.00488054
LOC400863	1.52809	0.180913	15.997	6.34419e-05	0.000321789
KIF18B	1.52719	3.76459	59.4515	1.25348e-14	4.54066e-13
CGB7	1.52715	2.91568	18.3755	1.81373e-05	0.000105854
P4HA3	1.52681	2.42775	21.155	4.23585e-06	2.87279e-05
ARMC4	1.52676	0.44355	14.2462	0.000160385	0.000733823
FAM195B	1.52654	6.11706	29.9919	4.33847e-08	4.47367e-07
ARID3B	1.52553	4.0144	55.3005	1.03443e-13	3.175e-12
LOC101928377	1.52494	0.619911	27.2232	1.81273e-07	1.64788e-06
LOC101928573	1.52456	0.0259991	24.259	8.42106e-07	6.65543e-06
LOC101926975	1.52436	0.483768	9.53582	0.002015	0.00680283
COL2A1	1.52397	0.955719	10.6957	0.00107388	0.00392998
HLA-DPB1-2	1.52372	-0.714224	6.16004	0.0130668	0.0340159
C2orf81	1.52329	3.16068	46.953	7.27084e-12	1.56122e-10
SCARNA21	1.52297	-1.61893	13.6217	0.000223592	0.000985331
NCAM1	1.52263	4.59139	16.6484	4.49881e-05	0.000236605
EFCAB6-AS1	1.52239	-0.22401	15.0008	0.000107467	0.000514448
MCM10	1.52215	3.09138	61.7634	3.87306e-15	1.55965e-13
ARSJ	1.52135	3.30206	33.0431	9.0139e-09	1.08043e-07
LOC102724921	1.5211	0.487197	26.597	2.50636e-07	2.21659e-06
C5orf38	1.52048	4.25735	34.2647	4.81035e-09	6.11556e-08
MTX1-2	1.51953	-0.311562	16.8778	3.98654e-05	0.000212442
LOXL1	1.51935	5.40541	33.5449	6.96361e-09	8.586e-08
LCN12	1.51818	0.576958	13.0886	0.000297091	0.00126711
IGSF9	1.51803	6.65741	44.6125	2.40148e-11	4.64829e-10
BRIP1	1.51801	4.51983	47.2279	6.31934e-12	1.37268e-10
C1QTNF1-AS1	1.51735	-1.25237	15.6548	7.60204e-05	0.000377776
SETBP1	1.51692	6.62306	52.4351	4.44707e-13	1.21719e-11
CLCF1	1.51676	2.28138	40.9363	1.57272e-10	2.65264e-09
LOC102723580	1.51633	2.5251	14.4555	0.000143507	0.000664284
LOC101927522	1.51579	-1.25538	5.98881	0.0143969	0.0367781
C9orf116	1.51499	1.10085	26.3845	2.79781e-07	2.45487e-06
GABRA3	1.51485	2.25114	24.6446	6.89373e-07	5.56491e-06
LOC100131347	1.51377	2.9219	40.4745	1.992e-10	3.28968e-09
LOC102723959	1.51374	-1.81337	8.79227	0.0030251	0.00966991
RP11-806H10.4	1.51304	-0.920836	12.3912	0.00043137	0.00176639
MCF2L2	1.5124	1.24289	40.0152	2.51997e-10	4.06577e-09
C12orf68	1.51134	0.554267	31.686	1.81228e-08	2.01836e-07
GNG13	1.51081	-0.277576	17.7149	2.56604e-05	0.000143576
CCDC24	1.51028	3.55415	31.6544	1.84199e-08	2.04681e-07
SMO	1.50978	6.30912	37.8943	7.46839e-10	1.10201e-08
NTN1	1.5095	5.32515	48.2138	3.82188e-12	8.75962e-11
FCGR1B	1.50608	-0.396519	21.9187	2.84451e-06	2.00168e-05
NPTX1	1.50589	3.27435	8.71691	0.00315272	0.0100165
DENND5B-AS1	1.5056	-1.26218	10.5735	0.00114723	0.00416441
NREP	1.50483	6.89913	40.0166	2.51815e-10	4.06551e-09
SLC39A4	1.50442	5.22621	32.095	1.46817e-08	1.66614e-07
TRPC4	1.50367	-0.386714	10.0525	0.00152143	0.00534679
MAGEL2	1.50252	0.490786	15.4787	8.34396e-05	0.000410322
ZNF285	1.50234	2.31502	32.0469	1.50492e-08	1.70077e-07
SELL	1.50182	3.05346	17.1366	3.47856e-05	0.000188235
MORN1	1.50007	3.0018	30.601	3.16927e-08	3.3734e-07
LGALS9C	1.49995	1.23071	14.5594	0.000135809	0.00063223
KRT75	1.49993	7.00391	14.7582	0.000122218	0.000576509
NKX2-8	1.49916	-0.693064	9.47939	0.00207793	0.00698933
JSRP1	1.49866	-0.220051	6.56746	0.010386	0.027959
C3AR1	1.49666	2.7113	21.2666	3.9964e-06	2.72622e-05
C1orf194	1.49642	-1.33769	5.6935	0.0170279	0.042503
C16orf74	1.49616	3.97586	29.7916	4.81072e-08	4.90146e-07
STON1	1.49586	4.55916	42.8849	5.80557e-11	1.0523e-09
CYFIP2	1.49452	5.54109	65.9759	4.56467e-16	2.19069e-14
EHMT2-5	1.49442	1.44669	16.0037	6.32186e-05	0.000320834
SLC20A1	1.49434	5.52421	88.5858	4.8678e-21	6.0598e-19
PHC2	1.49413	6.77688	83.0837	7.86512e-20	7.65414e-18
SIGLEC9	1.49377	0.717254	18.7887	1.46034e-05	8.73494e-05
FGD5P1	1.493	0.552745	20.1085	7.31723e-06	4.68043e-05
LOC101927254	1.49145	-0.380659	19.7516	8.8187e-06	5.54112e-05
KCNC3	1.49079	1.42495	33.5366	6.99358e-09	8.61862e-08
ARID5A	1.49064	4.94515	36.8092	1.30273e-09	1.84352e-08
NECAB2	1.48992	-1.04594	9.1285	0.00251658	0.00823407
GTSE1	1.4899	3.51564	60.917	5.95318e-15	2.29553e-13
NAV2	1.48939	7.43398	33.4742	7.22172e-09	8.86857e-08
ETV4	1.4883	5.13683	33.0467	8.9971e-09	1.07948e-07
GAREML	1.48756	3.75189	49.4452	2.03995e-12	4.92884e-11
AC058791.1	1.48733	2.07584	8.05777	0.00453089	0.0137231
LOC101926948	1.48732	-0.592795	10.5909	0.00113645	0.00413079
KDELC1	1.48613	3.28114	65.7072	5.23146e-16	2.47676e-14
NKX1-2	1.48584	-0.469602	7.97004	0.0047558	0.0143246
KCNC1	1.48519	-0.497899	10.373	0.00127868	0.00459137
TLE2	1.48515	5.63258	30.2945	3.7117e-08	3.87014e-07
DBH	1.48486	-0.515208	9.96131	0.00159865	0.00557367
PGLYRP1	1.48478	-0.891923	6.91235	0.00856026	0.0236844
CD24	1.48344	8.38444	47.1953	6.42528e-12	1.39446e-10
PIRT	1.48335	1.16648	7.80668	0.00520533	0.0154847
LOC389831	1.48205	2.57539	28.18	1.10543e-07	1.0471e-06
DLGAP5	1.48119	3.90986	41.6681	1.08159e-10	1.87456e-09
GMPR	1.48048	4.82234	27.0546	1.97792e-07	1.78399e-06
IGFBP2	1.48035	5.10764	24.7697	6.46068e-07	5.23774e-06
LOC101927025	1.48027	-0.916379	16.1801	5.75948e-05	0.000295122
DACT1	1.47982	4.07745	23.7162	1.11641e-06	8.57732e-06
TMEM206	1.47906	3.52642	95.5196	1.46435e-22	2.39411e-20
LOC101927848	1.47888	2.24201	31.9907	1.54915e-08	1.74914e-07
BMP1	1.47736	6.24508	61.4936	4.44177e-15	1.77122e-13
FREM2	1.47653	4.54309	19.0732	1.25801e-05	7.64214e-05
STX1A	1.47652	2.54744	53.9184	2.08988e-13	6.07253e-12
RP4-669L17.10-2	1.47575	0.929905	28.7666	8.16488e-08	7.96482e-07
LAMB3	1.47443	7.80623	42.068	8.81557e-11	1.55088e-09
NBPF13P	1.47435	-1.93509	7.28864	0.0069392	0.0197755
KIF4A	1.47418	3.8056	63.6859	1.45922e-15	6.37897e-14
TNFRSF12A	1.47413	5.02508	52.0602	5.38245e-13	1.43947e-11
TTYH3	1.47385	6.87743	68.3827	1.34652e-16	7.17871e-15
TMPRSS11D	1.47322	5.07444	6.81077	0.00906094	0.0248641
KHDC1L	1.47226	-1.04546	7.02384	0.00804317	0.0224454
C18orf61	1.47226	0.230964	16.0878	6.0472e-05	0.000308769
FBXO39	1.47192	1.10837	26.552	2.56539e-07	2.26308e-06
MPDZ	1.4708	6.08199	38.0333	6.95463e-10	1.03492e-08
F2RL3	1.47061	0.694937	20.7181	5.32113e-06	3.53082e-05
LRRIQ1	1.47008	1.59483	12.078	0.000510208	0.00204584
MELK	1.47007	3.80634	63.282	1.7913e-15	7.74777e-14
C18orf54	1.46949	3.40335	51.5282	7.05767e-13	1.85313e-11
BHLHE41	1.46942	5.83355	43.6754	3.87622e-11	7.23444e-10
C3orf67	1.46898	1.67508	32.8036	1.01958e-08	1.20444e-07
VARS-3	1.46877	0.985239	18.156	2.03528e-05	0.000117277
CD22	1.46803	0.592863	16.6556	4.48169e-05	0.000235805
SLC2A3	1.46762	5.52297	24.3002	8.24311e-07	6.52568e-06
PNMA5	1.467	-0.180717	6.79114	0.00916112	0.0250913
ICAM4	1.46609	-0.783916	8.7356	0.00312057	0.0099272
GAST	1.46584	-1.54784	10.105	0.0014787	0.00521629
PALM	1.46469	6.05525	30.7756	2.89662e-08	3.10747e-07
SULF2	1.4639	7.41304	54.9013	1.26738e-13	3.83244e-12
FAM64A	1.46286	2.57198	38.6004	5.20091e-10	7.89765e-09
RHPN1	1.46281	4.47414	17.0588	3.62391e-05	0.000195267
BEND3	1.46164	3.39717	87.6295	7.89395e-21	9.48976e-19
HLA-C	1.45984	4.04575	7.20525	0.00726905	0.020566
MIR196B	1.4585	-1.00156	10.5416	0.00116718	0.00422869
LAYN	1.45829	3.06839	32.5241	1.17725e-08	1.36893e-07
IFI6	1.45825	5.6739	27.4388	1.62144e-07	1.48818e-06
DCUN1D2	1.45801	5.90225	38.9249	4.40428e-10	6.78885e-09
SAMD15	1.45745	0.870273	29.0443	7.07437e-08	6.99564e-07
LOC102723581	1.45677	0.332852	20.8696	4.91624e-06	3.28876e-05
UOX	1.45612	-0.931598	5.5867	0.0180974	0.0447555
MGAT5	1.45563	7.05837	73.9363	8.06789e-18	5.3912e-16
TNFSF4	1.45538	1.77405	15.868	6.79177e-05	0.000341945
HES7	1.45519	-0.980097	10.8679	0.000978447	0.00362894
LOC339166	1.45412	0.169501	9.55522	0.00199381	0.00673781
PCDHB3	1.45231	1.83749	19.9742	7.84931e-06	4.98954e-05
HCCAT3	1.45198	-0.728515	13.2266	0.000276002	0.0011852
HMGB3	1.45174	6.06812	66.6226	3.28793e-16	1.5967e-14
STAG3	1.45123	4.41716	53.6614	2.38194e-13	6.83213e-12
LOC102724991	1.45058	-0.537356	9.73824	0.00180474	0.00619013
COLEC11	1.45038	-0.0958813	12.2992	0.000453142	0.0018411
SLC6A6	1.44895	7.30667	54.8967	1.27033e-13	3.83664e-12
BOK-AS1	1.4477	1.94045	19.7088	9.01861e-06	5.65369e-05
TCERG1L	1.44753	2.1284	18.6092	1.60445e-05	9.49965e-05
SLC34A1	1.44732	-0.2168	9.81104	0.00173467	0.00597907
DHX16-7	1.44723	0.0923793	11.8632	0.000572538	0.00226796
LOC729652	1.44701	-0.625335	11.7693	0.000602165	0.00237039
SLCO5A1	1.44565	0.569773	10.2169	0.00139161	0.00494964
TONSL	1.44481	4.85357	54.3384	1.68771e-13	5.02298e-12
SNORD93	1.44468	-1.68248	7.25153	0.00708405	0.0201122
PLCH1	1.44431	3.51001	9.26693	0.00233328	0.00772636
GATS	1.44419	5.44449	57.4975	3.38405e-14	1.14786e-12
BAHCC1	1.44357	5.38965	60.2595	8.31427e-15	3.09407e-13
ZNF883	1.44192	2.13424	33.2236	8.21486e-09	9.98321e-08
RASL10B	1.4411	1.66899	26.9832	2.05237e-07	1.84435e-06
IRF8	1.4411	4.55711	36.8256	1.29182e-09	1.83019e-08
FAM65C	1.44062	4.39978	24.5257	7.33253e-07	5.87849e-06
CENPF	1.44049	6.33253	30.5472	3.25836e-08	3.45175e-07
PRSS22	1.44046	4.88052	18.3927	1.79742e-05	0.000105052
IL4	1.43992	-1.02726	11.0916	0.0008672	0.00326736
POU2AF1	1.43913	2.3413	9.30419	0.00228631	0.00758515
BAG6-5	1.43813	1.05011	16.2586	5.52584e-05	0.000284458
GRAMD1A	1.43779	5.3013	57.7484	2.9788e-14	1.02457e-12
CAPN6	1.43749	3.04097	11.6629	0.000637588	0.00249024
TMEM121	1.43736	1.53818	24.0318	9.47579e-07	7.41968e-06
SIGLEC7	1.43718	-0.221639	14.3738	0.000149877	0.000690249
FOXS1	1.43616	0.905831	18.6574	1.56439e-05	9.29385e-05
GABBR1-2	1.4349	0.608568	7.37387	0.00661784	0.018991
LOC646588	1.43462	1.90677	8.0884	0.00445495	0.0135365
LAMA5	1.43438	8.70116	33.8218	6.03977e-09	7.54172e-08
SAMSN1	1.43328	3.57644	15.0149	0.000106664	0.000511605
NEFM	1.43252	1.44702	5.64367	0.0175185	0.043537
FAM151A	1.43238	2.38878	30.4069	3.50278e-08	3.67574e-07
WDR90	1.43194	5.63447	32.2399	1.36263e-08	1.55919e-07
KCNQ3	1.43117	3.00562	19.6011	9.54122e-06	5.94031e-05
IGFBPL1	1.43026	0.873138	16.5058	4.85013e-05	0.000252805
LOC102723844	1.42828	-0.688607	8.22368	0.00413473	0.0127036
LINC00514	1.4281	-0.235011	7.90187	0.00493838	0.0147964
XCL2	1.42751	-0.683973	17.7776	2.48287e-05	0.0001394
ASTL	1.42708	0.33597	17.4838	2.89763e-05	0.000159886
CCDC11	1.42603	1.50728	24.3198	8.15943e-07	6.4695e-06
GDAP1L1	1.42522	-0.67596	5.99461	0.0143496	0.0366841
LINC01127	1.42518	0.980936	11.4688	0.000707753	0.00273208
ABCC1	1.42496	3.13144	45.9126	1.23649e-11	2.53119e-10
PAMR1	1.42454	6.46259	18.6846	1.5422e-05	9.17981e-05
PABPC1L	1.42388	4.63918	25.9667	3.47353e-07	2.99525e-06
CREB3L4	1.42385	4.68029	45.6205	1.43535e-11	2.91153e-10
TCEA2	1.42241	4.95074	36.7076	1.37241e-09	1.93989e-08
FAM227A	1.42221	3.7368	36.0074	1.96574e-09	2.68867e-08
AJAP1	1.42213	1.23579	22.1213	2.55951e-06	1.82204e-05
TBX2	1.42086	3.35856	26.4549	2.69761e-07	2.37119e-06
LOC102724109	1.42018	-0.552933	24.3392	8.07803e-07	6.41363e-06
LINC00965	1.41899	-0.821822	9.226	0.00238602	0.00788078
ZCCHC5	1.41847	-0.744321	13.5801	0.000228593	0.00100484
TIMP1	1.41783	6.88949	34.1504	5.10116e-09	6.4485e-08
WDR96	1.41752	2.8351	14.5734	0.000134806	0.000628155
BCAT1	1.4169	4.53662	11.9524	0.000545765	0.00217278
LOC102724378	1.4164	-1.05274	12.8199	0.000342952	0.00143623
PRSS27	1.41613	4.24554	21.9506	2.79759e-06	1.97206e-05
CD79A	1.41611	2.50201	6.80111	0.0091101	0.0249711
LOC102723866	1.41597	-0.934426	11.0319	0.000895566	0.00336235
LOC102724897	1.41562	-1.08602	10.3539	0.00129203	0.00463378
LINC00461	1.41449	0.158237	5.73046	0.0166731	0.0417599
LOC101927674	1.41395	-1.19805	11.8364	0.000580829	0.00229767
DPYSL4	1.41385	1.76927	22.2828	2.35302e-06	1.68188e-05
C19orf18	1.41383	1.79726	16.5077	4.84528e-05	0.000252605
KLK4	1.41317	0.0523718	6.74748	0.00938804	0.0256241
LOC155060	1.41279	4.52377	23.3701	1.33641e-06	1.00688e-05
MAGED1	1.412	7.26203	70.3946	4.85536e-17	2.78208e-15
TOX2	1.41177	3.83865	16.4423	5.01524e-05	0.000260635
KIF26B-2	1.41095	-0.391751	6.56422	0.0104049	0.0280008
LEPRE1	1.40989	5.52054	69.5481	7.45732e-17	4.10052e-15
PTPRVP	1.40969	0.640742	10.4339	0.0012372	0.00446128
FBLIM1	1.40935	6.08972	71.9052	2.2579e-17	1.3983e-15
EDA2R	1.40788	3.44156	30.5555	3.24452e-08	3.43968e-07
EMID1	1.40694	4.79703	23.5775	1.19984e-06	9.14665e-06
LOC101928767	1.40692	0.123852	20.5036	5.95186e-06	3.90068e-05
MT1H	1.40633	0.823569	10.3902	0.00126684	0.00455474
PODXL2	1.40609	4.81283	30.2463	3.80508e-08	3.96414e-07
LOC101927943	1.40595	2.19733	52.8011	3.69088e-13	1.02161e-11
LOC102723359	1.40567	0.155143	29.2932	6.22122e-08	6.202e-07
TROAP	1.40557	3.96815	38.8878	4.48872e-10	6.90165e-09
SALL1	1.40501	0.498362	7.754	0.00535938	0.0158698
LOC100996273	1.40245	0.863456	12.6803	0.000369524	0.00153647
APLN	1.40203	1.89487	16.8476	4.05043e-05	0.000215239
GRIK2	1.40196	2.55027	15.1557	9.89975e-05	0.000478852
LINC00639	1.40171	0.944656	12.1817	0.000482608	0.00194791
ZNF878	1.40007	-0.468631	14.9795	0.000108683	0.000519661
HMX1	1.39986	-0.983542	6.7196	0.00953591	0.0259727
ACBD7	1.3997	1.32318	25.0178	5.68041e-07	4.67471e-06
LOC101929824	1.39946	-0.809007	8.95909	0.00276093	0.00893258
NEK5	1.39932	-0.439649	12.61	0.000383692	0.00158947
B4GALNT3	1.39872	6.09614	39.0694	4.08995e-10	6.3402e-09
CDC45	1.39815	3.52784	50.8292	1.00761e-12	2.5821e-11
ZNF503-AS2	1.3981	3.07584	48.2636	3.72607e-12	8.58523e-11
BUB1B	1.39771	4.14137	59.0537	1.53425e-14	5.47087e-13
FCRLA	1.39746	2.38612	12.9039	0.000327894	0.00138237
TTC25	1.39562	1.63158	27.6398	1.46144e-07	1.35195e-06
PRSS23	1.39519	6.5972	31.4935	2.0011e-08	2.20959e-07
FAM157C	1.39497	-0.610724	12.3069	0.000451278	0.00183512
LOC728763	1.39462	0.43501	7.0315	0.00800884	0.0223624
EPHX4	1.39438	0.586647	10.7771	0.00102763	0.00378175
LOC100128560	1.39425	0.371545	15.7578	7.19897e-05	0.000360007
LOC100996735	1.39343	-0.115339	20.4429	6.14375e-06	4.00929e-05
ZFHX2	1.39292	2.14317	27.7978	1.34682e-07	1.25587e-06
C22orf29	1.39156	7.06744	67.3499	2.27351e-16	1.15197e-14
LRRC55	1.39117	2.26945	9.8572	0.00169169	0.00585312
WDR54	1.39109	4.03135	71.5981	2.6381e-17	1.60819e-15
IL4I1	1.39104	2.19258	23.3668	1.33872e-06	1.0077e-05
GPR19	1.39011	0.689688	31.3407	2.1649e-08	2.37336e-07
COL18A1-AS1	1.38995	-0.231037	6.88894	0.00867305	0.0239471
TCF19-2	1.38789	-0.855213	8.4775	0.00359566	0.0112517
TMSB10	1.38767	9.11094	25.7891	3.80827e-07	3.25755e-06
TOP2A	1.38733	6.77507	42.6817	6.44104e-11	1.15552e-09
LOC729683	1.38693	1.35027	36.273	1.7152e-09	2.3805e-08
CCDC40	1.38569	3.03364	30.4151	3.48798e-08	3.66334e-07
SNX32	1.38549	2.06992	16.5249	4.80155e-05	0.000250613
ACHE	1.38353	1.26666	16.8131	4.12485e-05	0.00021872
CD38	1.38231	0.29027	7.41268	0.00647658	0.0186619
PHLDB1	1.38129	7.23248	49.0367	2.51219e-12	5.94682e-11
LOC101928998	1.38087	0.602955	8.56421	0.00342835	0.0107694
FCRL3	1.38014	0.235912	9.98877	0.00157498	0.00550603
MAD2L2	1.37853	5.06819	51.4482	7.35118e-13	1.92813e-11
PDE6B	1.37752	2.08932	21.0475	4.48029e-06	3.02352e-05
LCE3E	1.37744	4.47756	9.02288	0.00266622	0.00866894
FOXF2	1.37657	1.86793	18.4022	1.78852e-05	0.000104657
GINS2	1.37516	3.71984	48.9668	2.60332e-12	6.14475e-11
ORC6	1.37446	3.03414	60.861	6.12499e-15	2.35069e-13
MYBPC2	1.3727	-0.0514621	5.37605	0.020415	0.0496094
STMN3	1.3727	6.12815	34.2049	4.9603e-09	6.28989e-08
TMEM249	1.37254	0.499536	17.5792	2.75582e-05	0.000153043
LCE3D	1.37238	6.10623	8.85527	0.00292243	0.0093711
ZC3H12B	1.37225	2.47762	31.0152	2.56021e-08	2.77325e-07
POPDC3	1.37222	0.279138	9.84147	0.00170621	0.00589589
RFX8	1.37063	1.1644	19.3811	1.07063e-05	6.59612e-05
PPM1E	1.37035	1.354	22.8051	1.79293e-06	1.31253e-05
ANKRD31	1.36965	1.3676	12.4854	0.000410151	0.00168767
BUB1	1.3696	3.86689	53.7969	2.22322e-13	6.42952e-12
TM4SF1-AS1	1.36953	0.611439	24.705	6.68107e-07	5.40748e-06
LOC102724168	1.36832	1.82286	36.2537	1.7323e-09	2.39611e-08
THY1	1.36816	6.87808	25.1361	5.34243e-07	4.41732e-06
HJURP	1.36812	3.76286	57.1984	3.93983e-14	1.32176e-12
ERF	1.36792	6.43098	77.7849	1.14897e-18	8.91685e-17
CCNB2	1.36729	4.20313	57.3897	3.57469e-14	1.20585e-12
MDH1B	1.36565	1.83303	31.784	1.72307e-08	1.92953e-07
LRRN4	1.36559	-1.05287	6.65784	0.00987203	0.0267368
OR1Q1	1.36474	-1.17715	8.54771	0.00345957	0.0108602
TRO	1.36436	5.23439	24.6073	7.0285e-07	5.65694e-06
TGFB3	1.36415	5.11089	34.7643	3.7213e-09	4.81843e-08
LOC100506281	1.3633	-1.87008	5.81276	0.0159103	0.040097
CDCA7L	1.36325	6.19749	62.3468	2.88001e-15	1.19711e-13
ADAM21	1.36215	-0.916628	5.99999	0.014306	0.0366005
FGF13	1.36159	2.57629	26.266	2.97481e-07	2.60179e-06
RP11-170N11.1	1.36135	-0.63784	7.8912	0.00496759	0.0148676
C7orf13	1.36125	3.08017	31.4783	2.0168e-08	2.22392e-07
TUBB-7	1.36036	4.2235	19.7536	8.80979e-06	5.53835e-05
GPR125	1.35935	6.36325	85.5015	2.31525e-20	2.50129e-18
ZGLP1	1.35927	2.37825	14.9627	0.00010966	0.000524025
C11orf84	1.35918	3.87622	63.8112	1.36933e-15	6.00743e-14
RGS16	1.35867	3.4949	37.3367	9.93984e-10	1.43729e-08
HTR1B	1.35839	-0.86303	5.55704	0.0184065	0.0453898
GNMT	1.35832	0.222999	14.1303	0.000170574	0.000774224
TMCO3	1.35811	6.42353	42.4878	7.11231e-11	1.26853e-09
CPAMD8	1.35756	2.96637	11.1757	0.000828767	0.00313701
DISP2	1.35747	1.10133	16.4602	4.96824e-05	0.000258576
RGAG1	1.3569	-1.02681	9.75421	0.00178912	0.00614257
LOC101929319	1.35673	0.809126	10.8631	0.000980985	0.00363574
HTR3A	1.35655	1.42835	6.05789	0.0138443	0.0355963
CHD3	1.35653	8.42636	90.5579	1.79647e-21	2.40746e-19
CCDC57	1.35601	5.3385	31.5361	1.95769e-08	2.16555e-07
C1QB	1.35576	4.62554	16.6153	4.57795e-05	0.000240458
FSCN1	1.35563	7.30339	39.4011	3.45105e-10	5.42522e-09
CNTD2	1.35529	-1.10596	9.61303	0.00193201	0.00656525
ITPK1	1.35481	2.75152	22.7341	1.86041e-06	1.35546e-05
LINC00518	1.35385	1.97493	10.761	0.00103661	0.00381023
LOC102724662	1.35295	-1.49192	8.91267	0.00283199	0.00912397
TMPO-AS1	1.35279	3.6839	41.0219	1.5053e-10	2.55121e-09
BRINP1	1.35235	0.928434	9.37688	0.00219739	0.00732983
CYP2D6-3	1.35193	-0.116752	8.20942	0.00416736	0.012791
RAB40A	1.3519	0.565413	25.7864	3.8136e-07	3.26098e-06
CYP2D7P-3	1.35176	0.723476	10.5636	0.00115336	0.00418355
LOC101060216	1.35088	0.484141	6.97664	0.00825806	0.0229589
NRXN2	1.35018	3.18401	14.9161	0.000112402	0.000535358
LOC101060060	1.34966	-0.194571	18.3052	1.8819e-05	0.000109468
CITED1	1.34913	0.0730041	11.6086	0.000656491	0.00255808
CCNB1	1.34812	4.95093	46.5826	8.78356e-12	1.85377e-10
MIR1244-2	1.34806	-0.585004	8.32505	0.0039102	0.0121093
UXS1	1.34792	5.79223	68.7594	1.11238e-16	6.0354e-15
CEP55	1.34754	3.94957	64.5819	9.26002e-16	4.19765e-14
KLK9	1.34719	5.03637	9.81588	0.00173012	0.00596576
PSPN	1.34609	-0.703126	8.95499	0.00276713	0.00894912
CCDC147	1.3454	1.24967	18.5536	1.65192e-05	9.74914e-05
RING1-6	1.34529	-0.32753	14.562	0.000135619	0.000631583
PIANP	1.34443	0.657526	10.828	0.000999745	0.0036941
RGL3	1.34426	1.6785	11.2529	0.00079499	0.0030255
ALCAM	1.34398	7.7204	35.2706	2.86926e-09	3.79534e-08
ADAMTS12	1.34356	3.94334	8.78233	0.00304163	0.00971389
LOC102723865	1.34339	-0.990616	5.69019	0.01706	0.0425615
FOXD4	1.3431	0.0488583	17.7327	2.54215e-05	0.0001425
CHST11	1.34288	4.53395	27.234	1.80265e-07	1.64038e-06
KCNH8	1.34275	3.14962	20.1348	7.21704e-06	4.62842e-05
LINC00889	1.34229	-0.840807	11.6057	0.000657494	0.00256146
TRAF3IP3	1.34228	4.1926	59.4885	1.23012e-14	4.46925e-13
NLGN2	1.34148	5.48649	63.2491	1.82151e-15	7.86099e-14
EMILIN1	1.34139	5.06268	20.0076	7.71351e-06	4.90958e-05
FAM86HP	1.34106	2.64245	26.0252	3.36984e-07	2.91096e-06
UNC13A	1.34005	1.40645	6.80473	0.00909165	0.0249344
GCAT	1.33924	4.16116	24.4475	7.63622e-07	6.08812e-06
SCN3B	1.33808	2.93983	28.954	7.41195e-08	7.29417e-07
RHOH	1.3376	2.29367	12.3314	0.000445394	0.00181593
CAPZA3	1.33722	1.21006	8.609	0.00334506	0.0105388
LOC255187	1.33664	-1.7195	5.46515	0.0193994	0.0475037
MYO1B	1.33588	7.11499	49.6825	1.80753e-12	4.41953e-11
NXN	1.33561	6.44934	47.4987	5.50395e-12	1.21384e-10
SLC7A2	1.33559	7.29725	32.4557	1.21943e-08	1.41396e-07
ZNF724P	1.33483	-0.441642	11.2159	0.000811013	0.00307925
WDR86	1.33437	0.790452	17.873	2.36147e-05	0.000133255
MEX3B	1.33405	3.01354	32.7052	1.07249e-08	1.26208e-07
CDX1	1.33391	-0.484203	16.2035	5.68903e-05	0.000292306
SNTG2	1.33372	0.753105	14.0995	0.000173392	0.000785468
CENPV	1.33308	3.36672	33.0602	8.935e-09	1.07308e-07
LOC102723834	1.33126	-1.08175	9.20622	0.00241194	0.00795157
SLC1A1	1.3298	3.00382	38.008	7.04554e-10	1.04655e-08
ADAMTS2	1.32969	6.413	18.2635	1.92361e-05	0.000111587
LOC101927824	1.32648	-0.619277	14.5185	0.000138787	0.000644622
TCF3	1.3257	6.85062	75.8481	3.06347e-18	2.20319e-16
AKR1B1	1.32544	5.38595	53.332	2.81687e-13	7.98625e-12
LINC00926	1.32541	3.18896	14.1407	0.000169638	0.000770265
SLFNL1	1.32528	1.67296	24.5344	7.29959e-07	5.85399e-06
PCSK1	1.32451	2.25222	9.10839	0.00254439	0.00831428
BCAS4	1.32424	1.53804	32.2192	1.37721e-08	1.57164e-07
SLC3A2	1.32345	7.93611	42.2152	8.17601e-11	1.44459e-09
DTL	1.32294	4.00661	68.2273	1.45698e-16	7.65118e-15
KIF26B	1.32289	0.203491	10.2686	0.00135311	0.00482812
LOC101928574	1.3226	-0.031157	18.5237	1.67805e-05	9.88767e-05
LOC102723563	1.32189	-1.7064	6.3475	0.0117547	0.0310905
NT5DC2	1.31974	6.95808	34.1444	5.11702e-09	6.46522e-08
PHOX2A	1.31968	-0.358671	8.42105	0.00370902	0.011549
MTSS1	1.31958	7.7495	53.6398	2.40837e-13	6.89986e-12
PGBD1	1.31887	3.41505	74.1157	7.36695e-18	4.99081e-16
PLEKHO1	1.31842	5.25084	56.3047	6.20665e-14	1.9897e-12
CLDN9	1.31772	-0.708468	6.76661	0.00928791	0.0253881
PMEPA1	1.31768	6.65555	34.4143	4.45429e-09	5.70727e-08
SLC6A9	1.31765	6.75125	30.1836	3.93018e-08	4.07715e-07
PATZ1	1.31723	5.26667	51.3686	7.65534e-13	2.00149e-11
APLP1	1.3169	1.32909	15.7579	7.19874e-05	0.000360007
SNCB	1.31679	-0.780023	10.4089	0.00125413	0.00451434
SPATA17	1.31614	1.15504	39.7882	2.83043e-10	4.5191e-09
SPRR1A	1.31593	7.44151	8.30892	0.00394508	0.0121942
KIF2C	1.31569	4.24943	38.42	5.70449e-10	8.59845e-09
RAB31	1.31507	6.54468	31.2455	2.27378e-08	2.48605e-07
SLC22A20	1.31405	1.31518	15.8953	6.6946e-05	0.000337747
TMEM31	1.31403	-0.711273	10.7989	0.00101562	0.00374431
LOC100133182	1.31399	2.71156	9.3246	0.00226097	0.0075164
FGF17	1.31362	-0.0225196	7.76581	0.00532444	0.0157816
MURC	1.31216	0.599699	19.9975	7.75444e-06	4.93307e-05
CABLES1	1.31209	6.17473	45.9364	1.22152e-11	2.50473e-10
ICAM1	1.31127	5.11682	20.4376	6.16083e-06	4.0151e-05
GPR65	1.31117	2.01213	16.3727	5.20281e-05	0.000269299
ETV5	1.31046	5.35436	46.6493	8.48955e-12	1.79791e-10
NEK2	1.31021	3.20082	46.2484	1.04173e-11	2.16503e-10
UPK2	1.30966	-0.5103	9.87342	0.00167683	0.00580746
RBM11	1.30934	0.956789	19.4324	1.04221e-05	6.4405e-05
HCAR3	1.30713	4.12146	8.91632	0.00282633	0.00910814
LOC101929442	1.30709	0.490822	10.8833	0.000970348	0.00360394
CCND2	1.30557	7.68132	36.1152	1.85993e-09	2.55648e-08
GPR176	1.30522	3.79919	27.1789	1.8547e-07	1.67978e-06
COL3A1	1.3045	11.4572	11.6501	0.000642002	0.00250588
TSGA10IP	1.30399	-0.401411	6.9914	0.00819024	0.0227962
CR1	1.30338	1.0716	8.33975	0.0038787	0.0120209
STK36	1.30315	5.19017	37.6502	8.46377e-10	1.23772e-08
RXRB-6	1.30301	-0.229376	14.5244	0.000138359	0.000643125
CATSPERB-2	1.30272	-1.06232	8.27745	0.00401405	0.0123809
LOC101928085	1.3025	0.131461	22.3413	2.28242e-06	1.63619e-05
ZFP82	1.30106	2.66025	65.4748	5.88604e-16	2.74428e-14
LOC100505501	1.30069	0.841145	27.2749	1.76489e-07	1.609e-06
LOC101928076	1.3001	3.59528	31.8759	1.64345e-08	1.84626e-07
RING1-5	1.29994	0.367972	13.9786	0.000184903	0.000832945
LOC101928592	1.29874	0.0226436	14.2313	0.000161656	0.000738946
C8orf47	1.29851	1.42409	18.1106	2.08437e-05	0.000119628
LOC101930137	1.29839	0.00876273	20.4376	6.16061e-06	4.0151e-05
CELF3	1.29797	-0.0641445	6.49486	0.0108187	0.0289301
NDC80	1.29785	3.61063	54.9753	1.22053e-13	3.69741e-12
LOC101930567	1.29773	-0.907579	9.8977	0.00165485	0.00574497
STEAP1	1.29691	3.71665	32.9099	9.65321e-09	1.15032e-07
GUCA1B	1.29688	2.57448	20.8495	4.9681e-06	3.32073e-05
APBA2-2	1.2966	0.33232	15.0719	0.000103493	0.000497758
NPHP1	1.29615	2.88379	46.9515	7.27642e-12	1.56122e-10
LTBP1	1.29608	7.16025	47.8475	4.60684e-12	1.03176e-10
KRT85	1.29527	6.16384	6.6532	0.00989781	0.0267977
SLC7A10	1.29507	1.20092	13.8783	0.000195039	0.000872147
LBX2	1.29487	0.574021	14.9002	0.000113352	0.000539358
HPR	1.2947	-0.765535	6.85849	0.0088221	0.0243148
FAM167A	1.29468	6.9515	27.5512	1.52991e-07	1.4105e-06
LOC102723722	1.29454	-0.68643	8.31669	0.00392824	0.0121544
LRRCC1	1.29324	5.65956	37.6959	8.26777e-10	1.21122e-08
SH2D7	1.29311	-0.621151	11.7521	0.000607753	0.00238791
MICAL3	1.29082	6.60799	62.6872	2.42283e-15	1.01917e-13
SLC5A9	1.29002	3.96353	13.0768	0.000298975	0.00127425
CDHR2	1.28993	0.240783	8.8419	0.00294392	0.00943255
UBE2C	1.28902	4.08011	39.9429	2.61497e-10	4.20522e-09
VTN	1.28894	-0.314522	11.3532	0.000753194	0.00288614
FBRSL1	1.28865	6.22356	35.7654	2.22566e-09	3.01225e-08
AC012309.5	1.28841	0.411335	12.8773	0.000332593	0.00139882
MT1G	1.28776	3.18876	14.2071	0.000163755	0.000746731
SEPT3	1.28761	3.86402	36.0981	1.87634e-09	2.575e-08
CTXN3	1.2875	-1.12542	11.0988	0.000863855	0.00325575
FHAD1	1.28683	1.08343	13.265	0.000270403	0.0011636
LINC00528	1.28647	-0.734873	12.2135	0.000474452	0.00191783
IL1A	1.28611	2.79493	6.19128	0.0128381	0.0334902
PITPNC1	1.28592	4.03432	48.4931	3.31456e-12	7.69757e-11
ABCC1-2	1.28571	3.81528	44.0872	3.1407e-11	5.93852e-10
HELLS	1.28448	3.90438	25.2566	5.01862e-07	4.17462e-06
BIRC5	1.28406	4.59536	34.3422	4.62253e-09	5.89817e-08
AGRP	1.28396	-1.72658	5.58321	0.0181334	0.04482
ZFP69B	1.28295	2.48484	23.2355	1.43323e-06	1.07128e-05
F2RL2	1.28284	4.58523	20.6813	5.42445e-06	3.59441e-05
CADM1	1.28095	5.96199	33.4505	7.31026e-09	8.95937e-08
CACNA2D3	1.27997	2.72998	18.7431	1.49567e-05	8.93105e-05
SSBP3-AS1	1.27969	1.75698	18.0219	2.18382e-05	0.00012426
CDC6	1.27969	3.90928	56.5623	5.44467e-14	1.76621e-12
TP73	1.27921	5.64427	22.5391	2.0591e-06	1.48664e-05
LOC102724213	1.27898	-1.72417	6.08173	0.0136587	0.0352113
KRBA1	1.27821	4.59203	53.2172	2.98639e-13	8.41694e-12
SLC27A5	1.27694	2.95898	22.9712	1.64447e-06	1.2129e-05
SMPDL3B	1.27692	2.48884	33.1728	8.43239e-09	1.02222e-07
PROX1-AS1	1.27674	-0.888965	14.605	0.000132562	0.000619113
FGFR4	1.27576	1.66734	15.1336	0.000100166	0.000483844
ZFC3H1	1.27499	7.43381	29.6817	5.09119e-08	5.15935e-07
LOC101928221	1.27497	-0.669777	14.9228	0.000111999	0.000534057
CDK5R1	1.27415	3.68268	52.0377	5.44443e-13	1.44972e-11
UCN2	1.27361	4.15156	15.6192	7.7463e-05	0.000384244
UCP1	1.27305	-1.91729	5.99047	0.0143834	0.0367513
LPCAT1-2	1.27182	0.233332	12.233	0.000469516	0.00189976
GABRB3	1.27163	3.41859	18.1275	2.06593e-05	0.000118736
CA3	1.27152	3.13166	11.2474	0.000797358	0.00303404
ART5	1.27123	-0.148921	9.83261	0.00171444	0.0059185
SOGA2	1.27103	4.49304	51.4102	7.49478e-13	1.9637e-11
TMTC1	1.27098	6.12088	22.8489	1.75246e-06	1.28559e-05
ZKSCAN7	1.27043	2.8478	39.896	2.67845e-10	4.29323e-09
MME	1.2696	5.66311	14.8895	0.000113996	0.000542107
CXCL9	1.26899	5.65107	8.4232	0.00370464	0.0115383
FLNA	1.26877	10.1572	49.3126	2.18257e-12	5.2322e-11
CPXM1	1.26837	5.02025	14.4762	0.000141941	0.000657527
GPR4	1.26797	1.63809	18.5712	1.63674e-05	9.67215e-05
LOC401286	1.26795	0.0639247	5.69417	0.0170214	0.0425025
ENO2	1.26759	5.14249	41.5177	1.16807e-10	2.01164e-09
EXO1	1.26748	2.94187	48.1897	3.86922e-12	8.85156e-11
FSIP1	1.2666	3.23035	20.448	6.12721e-06	4.00383e-05
SALL4	1.26629	1.09356	8.79156	0.00302627	0.00967112
TRIM27-3	1.26614	-0.14631	16.4445	5.00955e-05	0.000260415
IZUMO1	1.26573	-0.745157	10.0981	0.00148422	0.00523427
LOC730101	1.26541	2.8767	39.1872	3.85061e-10	6.00715e-09
CNTN4	1.26482	3.29104	11.5518	0.000676835	0.00262933
EFNB3	1.26455	4.86169	41.1526	1.40794e-10	2.39781e-09
IL2RA	1.26408	1.91397	16.0151	6.28396e-05	0.000319262
FBXO15	1.26371	0.145131	14.1869	0.000165516	0.000753503
RNF152	1.26306	7.60848	21.0956	4.36923e-06	2.95426e-05
VWA2	1.25989	5.86287	28.4422	9.65385e-08	9.27345e-07
ZNF286B	1.25924	2.86851	48.5376	3.24011e-12	7.53179e-11
NANOS3	1.25647	0.482043	7.08808	0.00775984	0.0217662
TRIP13	1.25643	3.26561	59.5304	1.2042e-14	4.3946e-13
RP5-858B6.3	1.25643	-1.09408	12.5636	0.00039333	0.0016261
COL18A1-AS2	1.25622	-1.36111	5.46056	0.0194504	0.0476192
SERPINB3	1.25615	7.55275	7.08737	0.00776292	0.0217724
CYGB	1.25544	4.84869	19.0782	1.2547e-05	7.62584e-05
LOC375196	1.25507	-0.741025	13.0505	0.000303211	0.00128984
ACTN1-AS1	1.25501	-1.17898	8.89712	0.00285621	0.00919113
GEM	1.25471	4.76965	23.163	1.48833e-06	1.10941e-05
NFAM1	1.25441	3.97948	32.8007	1.02108e-08	1.20563e-07
TRPC5OS	1.25417	-1.73108	5.73045	0.0166732	0.0417599
TTLL13	1.25362	-0.826003	7.80982	0.00519631	0.0154625
IGSF6	1.25251	2.68299	12.1337	0.000495184	0.00199309
HN1	1.25238	6.13379	41.528	1.16193e-10	2.00248e-09
MT2A	1.25226	6.52167	23.3619	1.34208e-06	1.0096e-05
STIM2	1.25197	6.53239	63.9182	1.29695e-15	5.7309e-14
LOC101927881	1.25169	-0.347361	9.83725	0.00171013	0.0059061
NLGN3	1.25023	2.00188	35.3023	2.823e-09	3.73819e-08
CCHCR1	1.25005	2.15027	7.28831	0.00694046	0.0197755
CTSLP2	1.24998	-1.65209	5.7411	0.0165724	0.0415479
LOC100289333	1.24995	-1.36936	7.17062	0.00741073	0.0209138
SEMA6A	1.24965	5.97386	54.6237	1.45965e-13	4.38145e-12
PROC	1.24922	0.826637	16.7352	4.29769e-05	0.000227197
CD180	1.24843	0.584204	9.13877	0.0025025	0.00820142
DDR1-7	1.24831	-1.7265	6.2307	0.0125554	0.0328798
DXO-6	1.24828	-0.734603	12.2392	0.000467947	0.00189434
LRRC6	1.24824	2.85435	32.0613	1.49387e-08	1.68983e-07
CFB	1.24777	0.361057	8.83671	0.0029523	0.0094557
TTK	1.24729	3.82174	45.0488	1.92188e-11	3.79791e-10
MTA1	1.24671	6.35673	45.4597	1.5581e-11	3.12194e-10
DSCR9	1.24519	-0.957135	13.75	0.000208821	0.000927069
ADAM20P1	1.24385	0.817712	13.3311	0.000261037	0.00112801
TPTE2	1.24381	-0.994375	5.9017	0.0151263	0.0383576
SAP25	1.24304	3.20832	9.91677	0.00163779	0.00569478
GBAP1	1.24295	1.30737	21.6475	3.27643e-06	2.27753e-05
LOC102723729	1.24289	-0.0826791	22.9061	1.70108e-06	1.25202e-05
CEL	1.24284	1.37497	17.261	3.25805e-05	0.000177714
SGOL1-AS1	1.24159	0.714683	27.8658	1.3003e-07	1.21758e-06
AMPD2	1.2414	5.87925	44.6917	2.30633e-11	4.47827e-10
ZNF8	1.24091	2.87815	44.6297	2.38054e-11	4.61505e-10
[truncated: 3,241 more rows]
