# Supplementary material for: The transcriptional landscape analysis of basal cell carcinomas reveals novel signalling pathways and actionable targets
Source: Life Sci Alliance. 2021 May 10;4(7):e202000651. doi: 10.26508/lsa.202000651 (PMC8200290; doi:10.26508/lsa.202000651)
Supplement: Supplementary file 3 [file LSA-2020-00651_TableS3.xlsx]

## Sheet: TableS3
Supplementary Table 3. Upregulated KEGG pathways in all BCC compared to normal skin samples. Q-value FDR<0.05.
ID	Name	p-value	q-value Bonferroni	q-value FDR B&H	q-value FDR B&Y	Hit Count in Query List	Hit Count in Genome	Hit in Query List
1474301	IL-17 signaling pathway	4.73e-07	0.000539	4.9e-05	0.000373	26	93	MMP1,MMP3,MMP9,MMP13,TRAF4,CSF2,CSF3,MAPK4,PTGS2,DEFB4A,IL17F,S100A7,S100A8,S100A9,CCL2,CCL7,CCL11,CXCL6,CXCL5,CXCL1,CXCL3,IL1B,IL4,IL17A,DEFB4B,FOSL1
83051	Cytokine-cytokine receptor interaction	1.07e-06	0.00122	0.000102	0.000776	52	270	ACVR1,ACVR2B,CXCL9,AMH,TNFRSF10C,OSM,PDGFA,PDGFRB,IL19,CSF2,CSF3,CSF3R,IL20,INHBE,IL17F,TNFRSF12A,CCL2,CCL4,CCL7,CCL8,CCL11,CCL25,CXCL6,CXCL5,XCL1,CXCL13,IL23A,TNFRSF21,GH2,EDAR,XCL2,IL24,CXCL1,CXCL3,TGFB3,THPO,CLCF1,EDA2R,TNFSF4,IL1A,IL1B,IL2RA,IL3RA,IL4,CXCR1,IL11,IL17A,INHBA,INHBB,INHBC,CXCR4,ACKR3
83113	Basal cell carcinoma	2.3e-06	0.00262	0.000202	0.00154	18	55	FZD7,FZD8,PTCH2,TCF7L1,PTCH1,LEF1,SMO,FZD2,STK36,GLI1,GLI2,HHIP,WNT2,WNT5A,WNT6,WNT7B,WNT8B,WNT9A
172847	Protein digestion and absorption	3.25e-06	0.00371	0.000265	0.00202	24	90	MME,COL22A1,COL1A2,COL2A1,COL3A1,COL4A1,COL4A2,COL5A1,COL5A2,COL6A1,COL6A2,COL6A3,COL9A2,COL10A1,COL11A1,COL12A1,DPP4,KCNE3,SLC1A1,SLC3A2,SLC7A9,SLC7A8,COL18A1,COL27A1
83105	Pathways in cancer	5.17e-05	0.0589	0.00393	0.0299	63	395	FZD7,FZD8,MMP1,MMP9,BIRC5,PTCH2,FGF17,CCNA1,NOS2,F2RL3,RUNX1,RUNX1T1,CDKN2A,PDGFA,PDGFRB,PGF,COL4A1,COL4A2,TRAF4,CSF3R,CTBP1,CTNNA2,TCF7L1,DAPK1,BIRC7,DCC,PTCH1,PTGS2,FGF20,FGF19,RAC3,RARA,E2F3,LEF1,F2R,RXRB,FGF5,FGF12,FGF13,FN1,SMO,FZD2,STK36,GNG13,GLI1,GLI2,GNB3,GNG4,GNG7,TGFB3,HHIP,WNT2,WNT5A,WNT6,WNT7B,WNT8B,WNT9A,ITGA2B,CXCR4,LAMA5,LAMB1,LAMB3,LAMC2
583255	Nicotine addiction	6.36e-05	0.0724	0.00453	0.0345	13	40	CACNA1B,CHRNA6,CHRNB2,GABRA3,GABRA5,GABRB2,GABRB3,GABRD,GABRG2,GABRR1,GABRR2,GRIA1,GRIN2D
377263	GABAergic synapse	0.000237	0.27	0.0159	0.121	20	88	CACNA1B,HAP1,SLC6A1,SLC6A11,SLC6A13,GABBR1,GABRA3,GABRA5,GABRB2,GABRB3,GABRD,GABRG2,GABRR1,GABRR2,GNG13,SLC38A5,GNB3,GNG4,GNG7,SLC38A3
83068	ECM-receptor interaction	0.000258	0.294	0.0164	0.125	19	82	COL1A2,COL2A1,COL4A1,COL4A2,COL6A1,COL6A2,COL6A3,COL9A2,FN1,SPP1,VTN,TNC,ITGA2B,ITGA4,ITGB6,LAMA5,LAMB1,LAMB3,LAMC2
83069	Cell adhesion molecules (CAMs)	0.000696	0.793	0.036	0.275	27	145	NLGN2,ALCAM,NCAM1,CLDN6,CLDN9,CD22,CD80,CDH3,CDH15,NLGN3,NRXN3,NRXN2,VCAN,CNTNAP2,CLDN17,VTCN1,CLDN19,SDC2,SELL,CD276,LRRC4,NTNG2,HLA-C,HLA-DPB1,CADM1,ICAM1,ITGA4
83054	Cell cycle	0.000766	0.872	0.0363	0.277	24	124	MCM2,MCM6,MCM7,CDC7,CDC45,BUB1,BUB1B,CCNA1,CCNB1,CCND2,CCNB2,CDC6,CDC25B,CDC25C,CDKN2A,CHEK1,E2F3,E2F5,MAD2L2,GADD45G,TGFB3,ORC6,TTK,MAD2L1
200309	Rheumatoid arthritis	0.00089	1	0.0396	0.301	19	90	ATP6V0D2,MMP1,MMP3,CD80,CSF2,CTSL,CCL2,CXCL6,CXCL5,LOC102723407,IL23A,CXCL1,TGFB3,HLA-DPB1,ICAM1,IL1A,IL1B,IL11,IL17A
83078	Hematopoietic cell lineage	0.000903	1	0.0396	0.301	20	97	MME,CD22,CD38,CR1,CSF2,CSF3,CSF3R,FCGR1A,LOC102723407,CD24,THPO,HLA-DPB1,IL1A,IL1B,IL2RA,IL3RA,IL4,IL11,ITGA2B,ITGA4
552665	Morphine addiction	0.00103	1	0.0432	0.329	19	91	CACNA1B,PDE4B,PDE7A,DRD1,GABBR1,GABRA3,GABRA5,GABRB2,GABRB3,GABRD,GABRG2,GABRR1,GABRR2,GNG13,GNB3,GNG4,GNG7,KCNJ3,KCNJ5
