# Supplementary material for: The transcriptional landscape analysis of basal cell carcinomas reveals novel signalling pathways and actionable targets
Source: Life Sci Alliance. 2021 May 10;4(7):e202000651. doi: 10.26508/lsa.202000651 (PMC8200290; doi:10.26508/lsa.202000651)
Supplement: Supplementary file 4 [file LSA-2020-00651_TableS4.xlsx]

## Sheet: TableS4
Supplementary Table 4. Upregulated PANTHER pathways in all BCC compared to normal skin samples. Q-value FDR<0.05.
ID	Name	p-value	q-value Bonferroni	q-value FDR B&H	q-value FDR B&Y	Hit Count in Query List	Hit Count in Genome	Hit in Query List
P00012	Cadherin signaling pathway	1.73e-16	1.97e-13	6.55e-14	4.99e-13	53	159	FZD7,FZD8,PCDHB16,DCHS1,CDH3,PCDH8,CDH8,CDH11,CDH13,CDH15,FAT3,PCDH11Y,CTNNA2,TCF7L1,CDHR2,PCDHB5,LEF1,FRK,FZD2,PCDH11X,PCDHGC5,PCDHGC4,PCDHGB3,PCDHGB2,PCDHGB1,PCDHGA7,PCDHGA6,PCDHGA5,PCDHGA4,PCDHB12,PCDHB11,PCDHB10,PCDHB8,PCDHB7,PCDHB6,PCDHB4,PCDHB3,PCDHB2,PCDHA11,PCDHA7,PCDHA6,PCDHA5,PCDHA4,PCDHA2,PCDHA1,CDH24,CDH22,WNT2,WNT5A,WNT6,WNT7B,WNT8B,WNT9A
P00057	Wnt signaling pathway	2.73e-10	3.11e-07	5.19e-08	3.95e-07	66	305	FZD7,FZD8,PCDHB16,DCHS1,MYCN,CDH3,PCDH8,CDH8,CDH11,CDH13,CDH15,FAT3,PCDH11Y,CTBP1,CTNNA2,TCF7L1,CDHR2,KREMEN2,PCDHB5,EDN1,TLE6,LEF1,SFRP5,SMARCB1,SMARCD3,FZD2,GNG13,PCDH11X,GNB3,GNG4,GNG7,PCDHGC5,PCDHGC4,PCDHGB3,PCDHGB2,PCDHGB1,PCDHGA7,PCDHGA6,PCDHGA5,PCDHGA4,PCDHB12,PCDHB11,PCDHB10,PCDHB8,PCDHB7,PCDHB6,PCDHB4,PCDHB3,PCDHB2,PCDHA11,PCDHA7,PCDHA6,PCDHA5,PCDHA4,PCDHA2,PCDHA1,CDH24,CDH22,TLE2,HELLS,…
P00039	Metabotropic glutamate receptor group III pathway	0.000311	0.355	0.0187	0.142	16	64	CACNA1B,PRKAR1B,PRKX,SLC1A1,SLC1A7,SNAP25,STX1A,GNB3,GNG4,GNG7,GRIA1,GRIK2,GRIK3,GRIN2D,GRM1,GRM4
P00050	Plasminogen activating cascade	0.000652	0.742	0.036	0.275	7	17	MMP1,MMP3,MMP9,MMP13,SERPINE1,PLAU,PLAUR
P00034	Integrin signalling pathway	0.000675	0.769	0.036	0.275	30	167	ACTN1,COL1A2,COL2A1,COL3A1,COL4A1,COL4A2,COL5A1,COL5A2,COL6A1,COL6A2,COL6A3,COL8A1,COL9A2,COL10A1,COL11A1,COL12A1,PXN,ARPC1B,FLNA,FN1,RND1,COL27A1,ITGA2B,ITGA4,ITGAX,ITGB6,LAMA5,LAMB1,LAMB3,LAMC2
