# Supplementary material for: The transcriptional landscape analysis of basal cell carcinomas reveals novel signalling pathways and actionable targets
Source: Life Sci Alliance. 2021 May 10;4(7):e202000651. doi: 10.26508/lsa.202000651 (PMC8200290; doi:10.26508/lsa.202000651)
Supplement: Supplementary file 5 [file LSA-2020-00651_TableS5.xlsx]

## Sheet: TableS5
Supplementary Table 5. Downregulated KEGG pathways in all BCC compared to normal skin samples. Q-value FDR<0.05.
ID	Name	p-value	q-value Bonferroni	q-value FDR B&H	q-value FDR B&Y	Hit Count in Query List	Hit Count in Genome	Hit in Query List
83042	PPAR signaling pathway	3.553e-14	8.943e-11	2.981e-11	2.506e-10	32	72	ACADL,ACADM,ME1,ACOX2,PLIN2,PLIN4,APOA1,APOC3,AQP7,CD36,PCK1,PCK2,ADIPOQ,FADS2,PLIN1,PPARG,CYP27A1,DBI,RXRG,FABP4,FABP7,ACSL1,SCD,PLIN5,SORBS1,ACSL5,ACSBG1,SLC27A2,ACSL6,HMGCS2,ACSBG2,LPL
132956	Metabolic pathways	1.498e-11	3.77e-08	5.386e-09	4.529e-08	199	1272	ABO,ACACB,MAOA,ACADL,ACADM,ACADSB,ACADVL,ACAT1,ACAT2,MAT1A,ACO1,ACOT4,CYP3A7-CYP3A51P,ME1,PANK1,ACOX2,ADH1B,ADH4,AK4,ALDH1A1,ALDH2,DEGS2,ALDH3B1,ALDH3B2,ALDH9A1,ALDOC,ALOX15B,AOX1,LIPF,GPAM,CYP4F2,DEGS1,PLPP2,ASPA,AOC3,AKR1C3,GALNTL5,MVD,MVK,ACER2,ATP5F1E,ATP6V1B1,ATP6V1G2,LDHAL6A,BCAT2,FBP2,BDH1,BLVRB,ALDH1A2,LOC102724788,BTD,CYP26C1,NOS1,NOS3,PNLIPRP3,RGN,PAFAH2,DGKI,PC,PCCA,PCCB,PCK1,PCK2,CDO1…
413387	C5 isoprenoid biosynthesis, mevalonate pathway	8.757e-09	2.204e-05	1.102e-06	9.266e-06	9	10	ACAT1,ACAT2,MVD,MVK,PMVK,HMGCR,HMGCS1,HMGCS2,IDI1
868084	Fatty acid metabolism	5.778e-08	0.0001454	6.323e-06	5.317e-05	19	48	ACADL,ACADM,ACADSB,ACADVL,ACAT1,ACAT2,FADS2,ELOVL6,MECR,ACSL1,FASN,SCD,ACSL5,PECR,ACSBG1,ACSL6,ELOVL5,ACSBG2,FADS1
83020	Retinol metabolism	1.442e-07	0.0003629	1.512e-05	0.0001271	22	65	CYP3A7-CYP3A51P,ADH1B,ADH4,ALDH1A1,AOX1,ALDH1A2,CYP26C1,CYP1A1,RDH8,CYP2B6,CYP2C9,CYP3A4,CYP3A5,RETSAT,RDH12,RDH11,DHRS9,DHRS4L2,UGT2B11,AWAT2,UGT2B7,SDR16C5
131226	Peroxisome	1.076e-06	0.002709	0.0001003	0.0008436	24	83	ACOX2,ABCD2,GNPAT,PEX3,DDO,MVK,PEX11A,CAT,CRAT,HACL1,PXMP2,HAO2,EPHX2,PIPOX,ACSL1,PEX5L,PMVK,FAR2,ACSL5,PECR,SLC27A2,ACSL6,PXMP4,IDH1
83007	Butanoate metabolism	6.183e-06	0.01556	0.0004716	0.003965	12	28	ACAT1,ACAT2,AACS,BDH1,ACSM4,ACSM1,ACSM5,ACSM3,GAD2,HMGCS1,HMGCS2,ACSM6
82933	Fatty acid biosynthesis	7.854e-06	0.01977	0.0005535	0.004654	8	13	ACACB,OLAH,ACSL1,FASN,ACSL5,ACSBG1,ACSL6,ACSBG2
82940	Steroid hormone biosynthesis	7.916e-06	0.01993	0.0005535	0.004654	18	58	CYP3A7-CYP3A51P,AKR1C3,CYP1A1,CYP1B1,CYP3A4,CYP3A5,AKR1C1,AKR1C2,SRD5A3,UGT2B11,SRD5A1,SULT2B1,UGT2B7,HSD3B1,HSD3B2,HSD11B1,HSD17B2,HSD17B8
83032	Drug metabolism - cytochrome P450	1.022e-05	0.02572	0.0006849	0.005759	20	70	MAOA,ADH1B,ADH4,MGST1,MGST2,ALDH3B1,ALDH3B2,AOX1,CYP2B6,CYP2C19,CYP2C9,CYP3A4,CYP3A5,FMO5,UGT2B11,HPGDS,GSTA3,GSTM5,GSTT2,UGT2B7
82986	Glycerolipid metabolism	1.034e-05	0.02603	0.0006849	0.005759	18	59	ALDH2,ALDH9A1,LIPF,GPAM,PLPP2,PNLIPRP3,DGKI,PNLIPRP1,MOGAT1,DGKG,MOGAT2,PNPLA3,LPIN1,DGAT2,MGLL,AGPAT3,DGKK,LPL
82998	Pyruvate metabolism	1.244e-05	0.03132	0.0007939	0.006676	14	39	ACACB,ACAT1,ACAT2,ME1,ALDH2,ALDH9A1,LDHAL6A,LDHD,PC,PCK1,PCK2,PKLR,ACSS2,ME3
82935	Fatty acid degradation	1.262e-05	0.03176	0.0007939	0.006676	15	44	ACADL,ACADM,ACADSB,ACADVL,ACAT1,ACAT2,ADH1B,ADH4,ALDH2,ALDH9A1,ACSL1,ACSL5,ACSBG1,ACSL6,ACSBG2
83022	Terpenoid backbone biosynthesis	1.994e-05	0.05018	0.001155	0.009711	10	22	ACAT1,ACAT2,MVD,MVK,FDPS,PMVK,HMGCR,HMGCS1,HMGCS2,IDI1
413390	Cholesterol biosynthesis, squalene 2,3-epoxide => cholesterol	2.236e-05	0.05627	0.001215	0.01022	7	11	NSDHL,DHCR7,DHCR24,MSMO1,SC5D,EBP,TM7SF2
83031	Metabolism of xenobiotics by cytochrome P450	2.521e-05	0.06344	0.001295	0.01089	20	74	ADH1B,ADH4,MGST1,MGST2,ALDH3B1,ALDH3B2,CYP1A1,CYP1B1,CYP2B6,CYP2C9,CYP3A4,CYP3A5,AKR1C1,UGT2B11,HPGDS,GSTA3,GSTM5,GSTT2,UGT2B7,HSD11B1
83053	Neuroactive ligand-receptor interaction	2.634e-05	0.06631	0.001326	0.01115	50	278	MC3R,MC5R,ADORA1,ADRA1A,ADRA2C,ADRB1,ADRB3,AGTR1,S1PR5,AVPR1A,GALR2,NPY5R,OPRK1,OPRM1,P2RY4,CGA,CHRM4,CHRNA2,GLP2R,GABBR2,CRHR2,PRLR,PTGER3,PTH2R,P2RY14,S1PR1,NMUR1,FSHR,GABRA2,GABRG1,GABRG3,CYSLTR1,GHR,NPFFR2,TACR2,GRIA2,GRIA4,GRIN2A,GRM3,GRM7,GRM8,THRB,RXFP2,VIPR2,HTR4,HTR6,GLRA3,LEP,LEPR,LHCGR
673221	Chemical carcinogenesis	3.856e-05	0.09707	0.001788	0.01504	21	82	CYP3A7-CYP3A51P,ADH1B,ADH4,MGST1,MGST2,ALDH3B1,ALDH3B2,CYP1A1,CYP1B1,CYP2C19,CYP2C9,CYP3A4,CYP3A5,AKR1C2,UGT2B11,HPGDS,GSTA3,GSTM5,GSTT2,UGT2B7,HSD11B1
82952	Valine, leucine and isoleucine degradation	4.088e-05	0.1029	0.001788	0.01504	15	48	ACADM,ACADSB,ACAT1,ACAT2,ALDH2,ALDH9A1,AOX1,AACS,BCAT2,PCCA,PCCB,HIBCH,ACAD8,HMGCS1,HMGCS2
1222950	Regulation of lipolysis in adipocytes	4.751e-05	0.1196	0.001788	0.01504	16	54	ADCY5,ADORA1,ADRB1,ADRB3,AQP7,PDE3B,CGA,PLIN1,PTGER3,PTGS1,ABHD5,FABP4,GNAI1,PLA2G16,MGLL,LIPE
82991	Arachidonic acid metabolism	8.255e-05	0.2078	0.002808	0.02361	17	62	ALOX15B,CYP4F2,AKR1C3,PLA2G2A,PLA2G4F,PTGES,CYP2B6,CYP2C19,CYP2C9,CYP2J2,PTGIS,PTGS1,EPHX2,HPGDS,PLA2G16,CYP4F8,CYP4F3
82959	Tyrosine metabolism	8.743e-05	0.2201	0.002934	0.02467	12	35	MAOA,ADH1B,ADH4,ALDH3B1,ALDH3B2,AOX1,AOC3,PNMT,DCT,DDC,HGD,TYRP1
814926	Carbon metabolism	0.00012	0.302	0.003472	0.02919	25	114	ACADM,ACAT1,ACAT2,ACO1,ME1,ALDOC,FBP2,CAT,RGN,PC,PCCA,PCCB,PKLR,HIBCH,HAO2,TKTL2,FBP1,SHMT1,G6PD,ACSS2,ME3,GLDC,GPT,IDH1,RPEL1
413382	beta-Oxidation, acyl-CoA synthesis	0.000174	0.438	0.003946	0.03317	5	7	ACSL1,ACSL5,ACSBG1,ACSL6,ACSBG2
83034	Biosynthesis of unsaturated fatty acids	0.0002138	0.538	0.004679	0.03934	9	23	ACOT4,FADS2,ELOVL6,SCD,ACOT1,PECR,ACOT2,ELOVL5,FADS1
790011	Ovarian steroidogenesis	0.000271	0.6821	0.005881	0.04944	14	50	ADCY5,AKR1C3,CGA,PLA2G4F,CYP1A1,CYP1B1,CYP2J2,FSHR,STAR,ACOT2,HSD3B1,HSD3B2,HSD17B2,LHCGR
83035	ABC transporters	0.0003178	0.7998	0.006556	0.05513	13	45	ABCA3,ABCA4,ABCD2,ABCC3,CFTR,ABCC2,ABCC9,ABCA10,ABCA9,ABCA8,ABCA6,ABCA5,ABCA13
82937	Steroid biosynthesis	0.0004053	1	0.008097	0.06808	8	20	NSDHL,DHCR7,DHCR24,MSMO1,SC5D,EBP,SOAT1,TM7SF2
82934	Fatty acid elongation	0.0004446	1	0.008477	0.07127	9	25	ACOT4,ELOVL6,ELOVL3,MECR,ACOT1,ELOVL4,ACOT2,ELOVL5,ELOVL1
194385	Fat digestion and absorption	0.0004703	1	0.008834	0.07428	12	41	ACAT2,LIPF,APOA1,APOA4,APOB,PLPP2,CD36,NPC1L1,PLA2G2A,PNLIPRP1,MOGAT2,DGAT2
524497	Sphingosine biosynthesis	0.000494	1	0.009143	0.07688	7	16	DEGS2,DEGS1,ACER2,SPTLC3,ACER1,ASAH2,CERS3
82966	beta-Alanine metabolism	0.0005916	1	0.01079	0.09073	10	31	ACADM,ALDH2,ALDH3B1,ALDH3B2,ALDH9A1,AOC3,HIBCH,GAD2,UPB1,CNDP1
989139	AMPK signaling pathway	0.000779	1	0.01381	0.1161	24	121	ACACB,ADRA1A,CCND1,FBP2,CD36,PCK1,PCK2,CFTR,PFKFB1,ADIPOQ,EEF2K,PPARG,PPP2R2B,FASN,FBP1,SCD,SLC2A4,PPARGC1A,GYS2,HMGCR,CAB39L,LEP,LEPR,LIPE
83004	Propanoate metabolism	0.0007845	1	0.01381	0.1161	10	32	ACACB,ACADM,ACAT1,ACAT2,LDHAL6A,PCCA,PCCB,HIBCH,ACSS3,ACSS2
83002	Glyoxylate and dicarboxylate metabolism	0.001141	1	0.01796	0.151	9	28	ACAT1,ACAT2,ACO1,CAT,PCCA,PCCB,HAO2,SHMT1,GLDC
82964	Tryptophan metabolism	0.001422	1	0.02156	0.1813	11	40	MAOA,ACAT1,ACAT2,ALDH2,ALDH9A1,AOX1,CAT,CYP1A1,CYP1B1,DDC,INMT
82936	Synthesis and degradation of ketone bodies	0.001614	1	0.02375	0.1997	5	10	ACAT1,ACAT2,BDH1,HMGCS1,HMGCS2
82958	Histidine metabolism	0.001646	1	0.02395	0.2014	8	24	MAOA,ALDH2,ALDH3B1,ALDH3B2,ALDH9A1,ASPA,DDC,CNDP1
194384	African trypanosomiasis	0.001692	1	0.02447	0.2058	10	35	APOA1,FAS,TLR9,PLCB4,PRKCB,HBA1,HBA2,HBB,IL12A,IL18
413388	Acylglycerol degradation	0.002717	1	0.03657	0.3074	5	11	LIPF,PNLIPRP3,PNLIPRP1,PNPLA3,MGLL
83093	Adipocytokine signaling pathway	0.00287	1	0.03842	0.3231	15	69	ACACB,CD36,PCK1,PCK2,ADIPOQ,RXRG,ACSL1,SLC2A4,ACSL5,PPARGC1A,ACSBG1,ACSL6,ACSBG2,LEP,LEPR
121494	Dilated cardiomyopathy	0.003066	1	0.04041	0.3397	18	90	ACTC1,ADCY5,ADRB1,ITGA8,MYH6,MYL3,CACNA2D1,CACNB4,PLN,DES,CACNG3,CACNG2,SGCA,SGCG,SLC8A1,TNNC1,CACNA2D4,ITGA7
