# Supplementary material for: The transcriptional landscape analysis of basal cell carcinomas reveals novel signalling pathways and actionable targets
Source: Life Sci Alliance. 2021 May 10;4(7):e202000651. doi: 10.26508/lsa.202000651 (PMC8200290; doi:10.26508/lsa.202000651)
Supplement: Supplementary file 6 [file LSA-2020-00651_TableS6.xlsx]

## Sheet: TableS6
Supplementary Table 6. Downregulated Reactome pathways in all BCC compared to normal skin samples. Q-value FDR<0.05.
ID	Name	p-value	q-value Bonferroni	q-value FDR B&H	q-value FDR B&Y	Hit Count in Query List	Hit Count in Genome	Hit in Query List
1457790	Keratinization	4.722e-47	1.189e-43	1.189e-43	9.994e-43	103	214	KRTAP5-8,KRT38,KRT36,KRTAP24-1,LCE1C,LCE1B,LCE1E,LCE1D,LCE1A,LCE2D,LCE2C,LCE1F,LCE2A,KRTAP4-7,LCE5A,KRTAP4-9,KRTAP13-1,KRT26,CDSN,KRTAP12-2,KRTAP10-10,KRTAP12-1,TGM5,KRT23,KRT72,PRSS8,KRTAP5-5,KRTAP10-1,KRTAP10-9,KRTAP10-2,KRTAP10-11,KRTAP10-4,KRTAP10-7,KRTAP10-6,KRTAP10-12,KRTAP10-8,KRTAP10-5,KRTAP12-3,KRTAP10-3,LCE2B,KRT77,KRTAP5-7,KRTAP5-11,DSC1,DSG1,KRTAP4-11,KRTAP3-2,KRTAP9-2,KRTAP9-8,KRTAP9…
1270001	Metabolism of lipids and lipoproteins	1.747e-29	4.396e-26	2.198e-26	1.848e-25	187	816	ACACB,ACADL,ACADM,ACADVL,ACAT1,ACAT2,ACOT4,ME1,ACOX2,PLIN2,LIPH,OSBPL6,DEGS2,ALDH3B1,ALDH3B2,ALOX15B,GNPAT,LIPF,GPAM,APOA1,APOA4,CYP4F2,APOB,LIPN,APOC1,APOC3,LIPK,DEGS1,ARSF,PLPP2,AACS,AKR1C3,MVD,MVK,ACER2,ABCC3,BCHE,PEX11A,BDH1,BMX,LIPM,PNLIPRP3,SLC25A20,CD36,PCCA,PCCB,CGA,PCTP,CIDEA,NPC1L1,PIP4K2A,HSD17B13,FADS2,PLA2G2A,PLA2G4F,PLD1,ELOVL6,PLIN1,HILPDA,PNLIPRP1,FA2H,G0S2,PTGES,PON1,PON3,PPARG,C…
1270010	Fatty acid, triacylglycerol, and ketone body metabolism	3.239e-10	8.153e-07	9.058e-08	7.617e-07	59	253	ACADL,ACADM,ACADVL,ACAT1,ACOT4,ME1,PLIN2,GPAM,APOA1,AACS,PEX11A,BDH1,SLC25A20,CD36,PCCA,PCCB,PCTP,ELOVL6,G0S2,PPARG,ELOVL3,CYP1A1,MOGAT1,DBI,ACSS3,THEM5,RORA,OLAH,ACSL1,FASN,ACSM3,SCD,MOGAT2,ACOT1,ACOT6,ACSL5,ELOVL4,LPIN1,PPARGC1A,ACSBG1,DGAT2,ACOT2,GPD1,ACSL6,PNPLA5,THRSP,ELOVL5,HMGCR,HMGCS1,HMGCS2,TECRL,AWAT2,ELOVL1,AGMO,ACSM6,AGPAT3,ACSBG2,HSD17B8,FADS1
1270011	Triglyceride Biosynthesis	4.672e-10	1.176e-06	1.036e-07	8.71e-07	29	82	ACOT4,GPAM,PCTP,ELOVL6,ELOVL3,MOGAT1,DBI,THEM5,OLAH,ACSL1,FASN,SCD,MOGAT2,ACOT1,ACOT6,ACSL5,ELOVL4,LPIN1,ACSBG1,DGAT2,ACOT2,GPD1,ACSL6,ELOVL5,TECRL,ELOVL1,AGMO,AGPAT3,ACSBG2
1270037	Cholesterol biosynthesis	4.939e-10	1.243e-06	1.036e-07	8.71e-07	15	24	ACAT2,MVD,MVK,NSDHL,DHCR7,DHCR24,MSMO1,SC5D,FDPS,PMVK,EBP,TM7SF2,HMGCR,HMGCS1,IDI1
1270302	Developmental Biology	1.293e-09	3.254e-06	2.169e-07	1.824e-06	168	1081	MEF2A,UNC5A,RASAL1,ANGPT1,KRTAP5-8,KRT38,KRT36,MYH11,FGF18,BTC,KLF5,CACNA1I,CACNA1H,KRTAP24-1,CACNB4,LCE1C,LCE1B,LCE1E,LCE1D,LCE1A,LCE2D,LCE2C,LCE1F,LCE2A,KRTAP4-7,CD36,LCE5A,KRTAP4-9,KRTAP13-1,PCK1,KRT26,CDSN,KRTAP12-2,KRTAP10-10,KRTAP12-1,KLF4,TGM5,KL,ADIPOQ,SHC2,PKLR,PLIN1,PLXNA2,KLB,NRG2,PPARG,KRT23,PLXNA4,KRT72,PRSS8,KRTAP5-5,KRTAP10-1,KRTAP10-9,KRTAP10-2,KRTAP10-11,KRTAP10-4,GAB2,KRTAP10-7,…
1457791	Formation of the cornified envelope	8.178e-09	2.058e-05	1.102e-06	9.266e-06	25	71	LCE1C,LCE1B,LCE1E,LCE1D,LCE1A,LCE2D,LCE2C,LCE1F,LCE2A,LCE5A,CDSN,TGM5,PRSS8,LCE2B,DSC1,DSG1,EVPL,FLG,LCE6A,PERP,SPINK5,TCHH,LCE4A,LOR,DSG4
1270012	Fatty Acyl-CoA Biosynthesis	2.471e-08	6.22e-05	2.962e-06	2.49e-05	21	55	ACOT4,PCTP,ELOVL6,ELOVL3,DBI,THEM5,OLAH,ACSL1,FASN,SCD,ACOT1,ACOT6,ACSL5,ELOVL4,ACSBG1,ACOT2,ACSL6,ELOVL5,TECRL,ELOVL1,ACSBG2
1270002	Lipid digestion, mobilization, and transport	4.954e-08	0.0001247	5.668e-06	4.766e-05	32	115	LIPH,LIPF,APOA1,APOA4,APOB,LIPN,APOC1,APOC3,LIPK,LIPM,PNLIPRP3,CIDEA,NPC1L1,HSD17B13,PLIN1,HILPDA,PNLIPRP1,FITM2,RELN,DAB1,FGF21,ABHD5,FABP4,FABP7,GPIHBP1,CIDEC,SOAT1,ANGPTL8,MGLL,FABP9,LIPE,LPL
1270190	Phase 1 - Functionalization of compounds	2.604e-07	0.0006554	2.622e-05	0.0002204	30	111	AADAC,MAOA,CYP3A7-CYP3A51P,ADH1B,ADH4,ALDH1A1,ALDH2,CYP4F2,AOC3,CYP4F12,CYP26C1,CES1,CYP1A1,CYP1B1,CYP2B6,CYP2C19,CYP2C9,CYP2J2,CYP3A4,CYP3A5,CYP4B1,CYP27A1,PTGIS,PTGS1,CYP39A1,ACSS2,CYP4F8,MARC1,CYP4F22,CYP4F3
1270087	Arachidonic acid metabolism	9.46e-07	0.002381	9.158e-05	0.00077	20	61	ALOX15B,CYP4F2,AKR1C3,PTGES,PON1,PON3,CYP1A1,CYP1B1,CYP2C19,CYP2C9,CYP2J2,CYP4B1,PTGIS,PTGS1,EPHX2,HPGDS,CYP4F8,AWAT1,CYP4F22,CYP4F3
1270189	Biological oxidations	1.162e-06	0.002924	0.0001044	0.0008779	47	229	AADAC,MAOA,MAT1A,CYP3A7-CYP3A51P,ADH1B,ADH4,MGST1,MGST2,ALDH1A1,ALDH2,CYP4F2,AOC3,CYP4F12,CYP26C1,CES1,ACSM4,CYP1A1,CYP1B1,CYP2B6,CYP2C19,CYP2C9,CYP2J2,CYP3A4,CYP3A5,CYP4B1,CYP27A1,ACSM1,PTGIS,PTGS1,ACSM5,GLYAT,GGT6,CYP39A1,GLYATL1,UGT2B11,ACSS2,SULT2B1,HPGDS,GLYATL2,GSTA3,GSTM5,GSTT2,CYP4F8,UGT2B7,MARC1,CYP4F22,CYP4F3
1270039	Activation of gene expression by SREBF (SREBP)	6.562e-06	0.01652	0.0004858	0.004085	15	42	ACACB,GPAM,MVD,MVK,ELOVL6,DHCR7,FASN,SC5D,SCD,FDPS,PMVK,TM7SF2,HMGCR,HMGCS1,IDI1
1383050	Defective C1GALT1C1 causes Tn polyagglutination syndrome (TNPS)	2.019e-05	0.05082	0.001155	0.009711	9	18	MUC15,MUC1,MUC3A,MUC5AC,MUC19,MUC12,MUC13,MUCL1,MUC16
1383051	Defective GALNT3 causes familial hyperphosphatemic tumoral calcinosis (HFTC)	2.019e-05	0.05082	0.001155	0.009711	9	18	MUC15,MUC1,MUC3A,MUC5AC,MUC19,MUC12,MUC13,MUCL1,MUC16
1383052	Defective GALNT12 causes colorectal cancer 1 (CRCS1)	2.019e-05	0.05082	0.001155	0.009711	9	18	MUC15,MUC1,MUC3A,MUC5AC,MUC19,MUC12,MUC13,MUCL1,MUC16
1269868	Muscle contraction	2.22e-05	0.05588	0.001215	0.01022	40	204	ACTG2,ACTN3,KCNK5,ATP1A2,ATP2B2,MYBPC1,MYH6,MYH11,MYL3,NOS1,CACNA2D1,NPPC,CACNB4,KCNK10,LMOD1,FXYD1,PLN,DES,ABCC9,KCNK7,KCNIP2,CACNG3,CACNG2,SCN1A,SCN4A,SCN7A,SCN9A,SORBS1,SLC8A1,ORAI1,TNNC2,TNNC1,TNNI2,TNNT1,KCNE5,CACNA2D4,ITPR1,KCND3,KCNJ2,KCNJ12
1270096	Synthesis of epoxy (EET) and dihydroxyeicosatrienoic acids (DHET)	2.296e-05	0.05779	0.001215	0.01022	6	8	CYP1A1,CYP1B1,CYP2C19,CYP2C9,CYP2J2,EPHX2
1269544	GPCR ligand binding	2.71e-05	0.06821	0.001337	0.01125	73	455	OPN4,MC3R,MC5R,FZD4,ADORA1,ADRA1A,ADRA2C,ADRB1,ADRB3,AGTR1,OPN5,S1PR5,AVPR1A,GALR2,NPY5R,OPRK1,OPRM1,P2RY4,CGA,GPR55,PF4,WNT4,CHRM4,GLP2R,CCR8,GABBR2,CRHBP,CRHR2,PTGER3,PTH2R,TAS2R1,P2RY14,OPN1LW,RGR,S1PR1,EDN3,RHO,GAL,GNB4,NMUR1,SAA1,WNT16,CCL13,CCL23,CXCL12,FSHR,PROK1,ACKR1,NMS,CYSLTR1,GCG,CCL27,FFAR4,NMU,NPFFR2,GNG12,TAC1,TACR2,XCR1,GRM3,GRM7,GRM8,PTGDR2,TRH,RXFP2,HTR4,HTR6,WNT3,WNT8A,WNT2B,XK…
1270191	Cytochrome P450 - arranged by substrate type	3.742e-05	0.09419	0.001788	0.01504	19	70	CYP3A7-CYP3A51P,CYP4F2,CYP4F12,CYP26C1,CYP1A1,CYP1B1,CYP2B6,CYP2C19,CYP2C9,CYP2J2,CYP3A4,CYP3A5,CYP4B1,CYP27A1,PTGIS,CYP39A1,CYP4F8,CYP4F22,CYP4F3
1270013	Synthesis of very long-chain fatty acyl-CoAs	4.056e-05	0.1021	0.001788	0.01504	11	28	ELOVL6,ELOVL3,ACSL1,ACSL5,ELOVL4,ACSBG1,ACSL6,ELOVL5,TECRL,ELOVL1,ACSBG2
1269545	Class A/1 (Rhodopsin-like receptors)	4.771e-05	0.1201	0.001788	0.01504	55	322	OPN4,MC3R,MC5R,ADORA1,ADRA1A,ADRA2C,ADRB1,ADRB3,AGTR1,OPN5,S1PR5,AVPR1A,GALR2,NPY5R,OPRK1,OPRM1,P2RY4,CGA,GPR55,PF4,CHRM4,CCR8,PTGER3,P2RY14,OPN1LW,RGR,S1PR1,EDN3,RHO,GAL,NMUR1,SAA1,CCL13,CCL23,CXCL12,FSHR,PROK1,ACKR1,NMS,CYSLTR1,CCL27,FFAR4,NMU,NPFFR2,TAC1,TACR2,XCR1,PTGDR2,TRH,RXFP2,HTR4,HTR6,XK,SUCNR1,LHCGR
1270198	Eicosanoids	4.902e-05	0.1234	0.001788	0.01504	7	12	CYP4F2,CYP4F12,CYP4B1,PTGIS,CYP4F8,CYP4F22,CYP4F3
1270038	Regulation of cholesterol biosynthesis by SREBP (SREBF)	6.086e-05	0.1532	0.002128	0.01789	16	55	ACACB,GPAM,MVD,MVK,ELOVL6,DHCR7,FASN,SC5D,SCD,FDPS,PMVK,TM7SF2,HMGCR,HMGCS1,IDI1,INSIG1
1270197	Fatty acids	0.0001028	0.2588	0.003195	0.02687	8	17	CYP4F2,CYP4F12,CYP2B6,CYP2J2,CYP4B1,CYP4F8,CYP4F22,CYP4F3
1339145	Cholesterol biosynthesis via lathosterol	0.0001112	0.2799	0.003293	0.02769	4	4	DHCR7,DHCR24,SC5D,EBP
1339144	Cholesterol biosynthesis via desmosterol	0.0001112	0.2799	0.003293	0.02769	4	4	DHCR7,DHCR24,SC5D,EBP
1268737	Termination of O-glycan biosynthesis	0.0001127	0.2838	0.0033	0.02774	10	26	MUC15,MUC1,MUC3A,MUC5AC,MUC19,MUC12,ST6GALNAC4,MUC13,MUCL1,MUC16
1270086	Linoleic acid (LA) metabolism	0.0001442	0.363	0.003946	0.03317	6	10	FADS2,ELOVL3,ACSL1,ELOVL5,ELOVL1,FADS1
1270216	Conjugation of carboxylic acids	0.0001442	0.363	0.003946	0.03317	6	10	ACSM4,ACSM1,ACSM5,GLYAT,GLYATL1,GLYATL2
1270215	Amino Acid conjugation	0.0001442	0.363	0.003946	0.03317	6	10	ACSM4,ACSM1,ACSM5,GLYAT,GLYATL1,GLYATL2
1269905	ABC transporters in lipid homeostasis	0.0001689	0.4252	0.003946	0.03317	8	18	ABCA3,ABCD2,PEX3,APOA1,ABCA10,ABCA9,ABCA6,ABCA5
1270043	Synthesis of bile acids and bile salts via 24-hydroxycholesterol	0.0001774	0.4465	0.003986	0.03352	7	14	AKR1C3,CYP27A1,PTGIS,AKR1C1,AKR1C2,CYP39A1,SLC27A2
1269625	The canonical retinoid cycle in rods (twilight vision)	0.0002138	0.538	0.004679	0.03934	9	23	ABCA4,NAPEPLD,RDH8,RBP4,RDH12,RHO,RDH11,DHRS9,TTR
1270153	Biotin transport and metabolism	0.0002905	0.7311	0.006196	0.0521	6	11	ACACB,BTD,PC,PCCA,PCCB,HLCS
1270144	Metabolism of vitamins and cofactors	0.0003017	0.7595	0.006376	0.05361	33	177	ACACB,PANK1,AOX1,APOA1,APOA4,APOB,APOC3,AKR1C3,BTD,PC,PCCA,PCCB,ENPP3,UBIAD1,NMNAT3,CTRB1,CYB5A,PTGIS,AKR1C1,NMRK1,SLC23A1,MOCOS,RBP4,RDH11,FASN,SHMT1,GPIHBP1,ALDH1L1,NMRK2,SLC19A3,HLCS,TTR,LPL
1270161	Branched-chain amino acid catabolism	0.0003119	0.7851	0.006489	0.05456	9	24	ACADSB,ACAT1,ALDH9A1,BBOX1,BCAT2,PPM1K,HIBCH,SHMT1,ACAD8
1269652	Nuclear Receptor transcription pathway	0.0003397	0.855	0.006952	0.05845	14	51	NR3C2,AR,NR1I2,NR4A2,PGR,PPARG,RORA,RORB,RORC,ESR1,RXRG,NR2F1,THRB,NR4A1
1270054	Glycerophospholipid biosynthesis	0.0004201	1	0.008306	0.06984	26	130	GNPAT,GPAM,BCHE,PCTP,PLA2G2A,PLA2G4F,PLD1,PITPNM3,ACP6,CHDH,PLA2R1,PNPLA3,HRASLS5,LPIN1,DGAT2,GPD1,PLA2G16,MFSD2A,MGLL,AWAT2,ETNPPL,DGAT2L6,AGPAT3,CHPT1,PLD4,SLC44A3
1270027	Synthesis of Ketone Bodies	0.0004257	1	0.008306	0.06984	5	8	ACAT1,AACS,BDH1,ACSS3,HMGCS2
1269900	Scavenging by Class B Receptors	0.0004565	1	0.008639	0.07264	4	5	APOA1,APOB,CD36,SAA1
1339115	Cardiac conduction	0.0007526	1	0.01363	0.1146	27	142	KCNK5,ATP1A2,ATP2B2,NOS1,CACNA2D1,NPPC,CACNB4,KCNK10,FXYD1,PLN,ABCC9,KCNK7,KCNIP2,CACNG3,CACNG2,SCN1A,SCN4A,SCN7A,SCN9A,SLC8A1,ORAI1,KCNE5,CACNA2D4,ITPR1,KCND3,KCNJ2,KCNJ12
1270003	Digestion of dietary lipid	0.0007679	1	0.01371	0.1153	7	17	LIPH,LIPF,LIPN,LIPK,LIPM,PNLIPRP3,PNLIPRP1
1269568	Opsins	0.000879	1	0.01485	0.1249	5	9	OPN4,OPN5,OPN1LW,RGR,RHO
1270095	Synthesis of (16-20)-hydroxyeicosatetraenoic acids (HETE)	0.000879	1	0.01485	0.1249	5	9	CYP4F2,CYP1A1,CYP1B1,CYP2C19,CYP2C9
1270219	Conjugation of salicylate with glycine	0.000879	1	0.01485	0.1249	5	9	ACSM4,ACSM5,GLYAT,GLYATL1,GLYATL2
1270026	Ketone body metabolism	0.000879	1	0.01485	0.1249	5	9	ACAT1,AACS,BDH1,ACSS3,HMGCS2
1270056	Acyl chain remodeling of DAG and TAG	0.000879	1	0.01485	0.1249	5	9	PNPLA3,DGAT2,MGLL,AWAT2,DGAT2L6
1270098	Sphingolipid de novo biosynthesis	0.0009476	1	0.01559	0.1311	12	44	DEGS2,ALDH3B1,ALDH3B2,DEGS1,PLPP2,ACER2,FA2H,SPTSSB,SPTLC3,ACER1,SGPP2,CERS3
1269576	G alpha (i) signalling events	0.001038	1	0.01697	0.1427	40	243	ADCY5,ADORA1,ADRA2C,OPN5,S1PR5,GALR2,NPY5R,OPRK1,OPRM1,P2RY4,GPR55,PF4,CHRM4,CCR8,GABBR2,RGS22,PTGER3,TAS2R1,P2RY14,OPN1LW,RGR,S1PR1,RGS13,RHO,GAL,GNB4,NMUR1,SAA1,CCL23,CXCL12,NMS,CCL27,NMU,GNG12,GNAI1,GRM3,GRM7,GRM8,PTGDR2,SUCNR1
1270006	Chylomicron-mediated lipid transport	0.001141	1	0.01796	0.151	9	28	APOA1,APOA4,APOB,APOC3,FGF21,GPIHBP1,CIDEC,ANGPTL8,LPL
1269631	RA biosynthesis pathway	0.001202	1	0.01867	0.157	8	23	ADH4,ALDH1A1,AKR1C3,ALDH1A2,CYP26C1,RDH11,DHRS9,SDR16C5
1269903	Transmembrane transport of small molecules	0.001399	1	0.02133	0.1794	92	680	ABCA3,ABCA4,ADCY5,ABCD2,SLC43A1,PEX3,SLC26A9,APOA1,APOD,AQP4,AQP5,AQP7,ATP1A2,SLC4A4,ATP2B2,ABCC3,ATP6V1B1,ATP6V1G2,AZGP1,NIPA1,NIPAL4,SLC2A14,SLC13A2,NIPAL1,SLC16A7,SLC24A5,SLC26A4,CFTR,SLC30A8,BEST3,TRPM5,CLCA1,CLCNKA,NALCN,SLC10A6,ABCC2,FXYD1,PLN,SLC39A2,ATP6V0A4,PRKAR2B,TRPM4,BEST2,FGF21,SLC26A3,SLC25A18,TSC22D3,ANO1,ABCC9,SGK2,NIPAL2,STEAP3,SLC47A1,GNB4,DMTN,ABCA10,ABCA9,ABCA8,ATP8A1,TRPM3,S…
1269308	Dectin-2 family	0.00151	1	0.02249	0.1891	9	29	MUC15,MUC1,MUC3A,MUC5AC,MUC19,MUC12,MUC13,MUCL1,MUC16
1270016	mitochondrial fatty acid beta-oxidation of saturated fatty acids	0.001614	1	0.02375	0.1997	5	10	ACADL,ACADM,ACADVL,ACSM3,ACSM6
1269343	Nitric oxide stimulates guanylate cyclase	0.001646	1	0.02395	0.2014	8	24	NOS1,NOS3,PDE2A,PDE3B,PDE11A,MRVI1,KCNMB3,ITPR1
1269623	Visual phototransduction	0.002104	1	0.03009	0.253	20	101	ABCA4,APOA1,APOA4,APOB,APOC3,AKR1C3,PDE6A,NAPEPLD,RDH8,AKR1C1,RBP4,OPN1LW,RDH12,RHO,RDH11,DHRS9,GPIHBP1,TTR,RGS9BP,LPL
1270085	alpha-linolenic acid (ALA) metabolism	0.002214	1	0.03131	0.2633	6	15	FADS2,ELOVL3,ACSL1,ELOVL5,ELOVL1,FADS1
1270084	alpha-linolenic (omega3) and linoleic (omega6) acid metabolism	0.002214	1	0.03131	0.2633	6	15	FADS2,ELOVL3,ACSL1,ELOVL5,ELOVL1,FADS1
1270009	Hormone-sensitive lipase (HSL)-mediated triacylglycerol hydrolysis	0.002341	1	0.03274	0.2753	7	20	PLIN1,ABHD5,FABP4,FABP7,MGLL,FABP9,LIPE
1270040	Bile acid and bile salt metabolism	0.002677	1	0.03657	0.3074	11	43	ACOX2,OSBPL6,AKR1C3,ABCC3,CYP27A1,PTGIS,AKR1C1,AKR1C2,CYP39A1,SLC27A2,STARD5
1270217	Conjugation of benzoate with glycine	0.002702	1	0.03657	0.3074	4	7	ACSM1,GLYAT,GLYATL1,GLYATL2
1270050	Androgen biosynthesis	0.002717	1	0.03657	0.3074	5	11	CGA,SRD5A3,SRD5A1,HSD3B1,HSD3B2
1269953	Stimuli-sensing channels	0.003015	1	0.03994	0.3358	20	104	BEST3,TRPM5,CLCA1,CLCNKA,NALCN,TRPM4,BEST2,TSC22D3,ANO1,SGK2,TRPM3,SCNN1A,SCNN1B,CLCA4,ANO3,UNC80,SLC9C1,TRPC5,TRPC6,TRPC7
1269624	Retinoid metabolism and transport	0.003254	1	0.04266	0.3587	11	44	APOA1,APOA4,APOB,APOC3,AKR1C3,AKR1C1,RBP4,RDH11,GPIHBP1,TTR,LPL
1383064	Wax biosynthesis	0.003688	1	0.04784	0.4023	3	4	FAR2,AWAT2,AWAT1
1269363	Effects of PIP2 hydrolysis	0.003791	1	0.04868	0.4093	8	27	ABHD6,DGKI,DGKG,TRPC6,MGLL,ITPR1,TRPC7,DGKK
1270194	Xenobiotics	0.003791	1	0.04868	0.4093	8	27	CYP3A7-CYP3A51P,CYP1A1,CYP2B6,CYP2C19,CYP2C9,CYP2J2,CYP3A4,CYP3A5
