# Supplementary material for: The transcriptional landscape analysis of basal cell carcinomas reveals novel signalling pathways and actionable targets
Source: Life Sci Alliance. 2021 May 10;4(7):e202000651. doi: 10.26508/lsa.202000651 (PMC8200290; doi:10.26508/lsa.202000651)
Supplement: Supplementary file 10 [file LSA-2020-00651_TableS10.xlsx]

## Sheet: TableS10
Supplementary Table 10. Upregulated GO biological process terms in high-risk BCC based solely on histopathological subtypes with aggressive features. Q-value FDR<0.05.
ID	Name	p-value	q-value Bonferroni	q-value FDR B&H	q-value FDR B&Y	Hit Count in Query List	Hit Count in Genome	Hit in Query List
GO:0032925	regulation of activin receptor signaling pathway	4.789e-05	0.09248	0.03016	0.2456	3	27	CSNK2B,ZIC2,MEN1
GO:2000113	negative regulation of cellular macromolecule biosynthetic process	6.855e-05	0.1324	0.03016	0.2456	13	1452	PRMT6,CDKN2A,IGF2BP3,CALCA,FEZF1,PITX1,MAEL,PAX9,FOXA1,AIM2,ZIC2,TNFSF4,MEN1
GO:0051090	regulation of DNA-binding transcription factor activity	7.298e-05	0.1409	0.03016	0.2456	7	395	CDKN2A,SPHK1,FOXA1,AIM2,ZIC2,TNFSF4,MEN1
GO:0045892	negative regulation of transcription, DNA-templated	7.789e-05	0.1504	0.03016	0.2456	12	1261	PRMT6,CDKN2A,CALCA,FEZF1,PITX1,MAEL,PAX9,FOXA1,AIM2,ZIC2,TNFSF4,MEN1
GO:0051173	positive regulation of nitrogen compound metabolic process	9.071e-05	0.1752	0.03016	0.2456	15	1944	CDKN2A,CALCA,PIM2,HOXD10,FEZF1,SPHK1,PITX1,RPS9,PAX9,FOXA1,AIM2,ZIC2,TLX1,TNFSF4,MEN1
GO:1903507	negative regulation of nucleic acid-templated transcription	0.0001066	0.2059	0.03016	0.2456	12	1303	PRMT6,CDKN2A,CALCA,FEZF1,PITX1,MAEL,PAX9,FOXA1,AIM2,ZIC2,TNFSF4,MEN1
GO:1902679	negative regulation of RNA biosynthetic process	0.0001189	0.2296	0.03016	0.2456	12	1318	PRMT6,CDKN2A,CALCA,FEZF1,PITX1,MAEL,PAX9,FOXA1,AIM2,ZIC2,TNFSF4,MEN1
GO:0010558	negative regulation of macromolecule biosynthetic process	0.0001249	0.2413	0.03016	0.2456	13	1540	PRMT6,CDKN2A,IGF2BP3,CALCA,FEZF1,PITX1,MAEL,PAX9,FOXA1,AIM2,ZIC2,TNFSF4,MEN1
GO:0048704	embryonic skeletal system morphogenesis	0.0001544	0.2982	0.03019	0.2459	4	103	HOXD10,HOXD11,MTHFD1,MEN1
GO:0051253	negative regulation of RNA metabolic process	0.0001668	0.3221	0.03019	0.2459	12	1366	PRMT6,CDKN2A,CALCA,FEZF1,PITX1,MAEL,PAX9,FOXA1,AIM2,ZIC2,TNFSF4,MEN1
GO:0045935	positive regulation of nucleobase-containing compound metabolic process	0.0001857	0.3586	0.03019	0.2459	14	1832	CDKN2A,CALCA,PIM2,HOXD10,FEZF1,SPHK1,PITX1,PAX9,FOXA1,AIM2,ZIC2,TLX1,TNFSF4,MEN1
GO:0031327	negative regulation of cellular biosynthetic process	0.0001893	0.3654	0.03019	0.2459	13	1605	PRMT6,CDKN2A,IGF2BP3,CALCA,FEZF1,PITX1,MAEL,PAX9,FOXA1,AIM2,ZIC2,TNFSF4,MEN1
GO:0010629	negative regulation of gene expression	0.0002167	0.4185	0.03019	0.2459	13	1627	PRMT6,CDKN2A,IGF2BP3,CALCA,FEZF1,PITX1,MAEL,PAX9,FOXA1,AIM2,ZIC2,TNFSF4,MEN1
GO:0009890	negative regulation of biosynthetic process	0.0002275	0.4394	0.03019	0.2459	13	1635	PRMT6,CDKN2A,IGF2BP3,CALCA,FEZF1,PITX1,MAEL,PAX9,FOXA1,AIM2,ZIC2,TNFSF4,MEN1
GO:0051172	negative regulation of nitrogen compound metabolic process	0.0002345	0.4529	0.03019	0.2459	13	1640	PRMT6,CDKN2A,IGF2BP3,CALCA,FEZF1,PITX1,MAEL,PAX9,FOXA1,AIM2,ZIC2,TNFSF4,MEN1
GO:0032924	activin receptor signaling pathway	0.0002559	0.4941	0.03088	0.2515	3	47	CSNK2B,ZIC2,MEN1
GO:0032927	positive regulation of activin receptor signaling pathway	0.0003011	0.5814	0.03277	0.2668	2	10	CSNK2B,ZIC2
GO:0031328	positive regulation of cellular biosynthetic process	0.0003054	0.5898	0.03277	0.2668	14	1921	CDKN2A,CALCA,PIM2,HOXD10,FEZF1,SPHK1,PITX1,RPS9,PAX9,FOXA1,AIM2,ZIC2,TLX1,MEN1
GO:0009891	positive regulation of biosynthetic process	0.0003741	0.7225	0.03739	0.3045	14	1959	CDKN2A,CALCA,PIM2,HOXD10,FEZF1,SPHK1,PITX1,RPS9,PAX9,FOXA1,AIM2,ZIC2,TLX1,MEN1
GO:0045934	negative regulation of nucleobase-containing compound metabolic process	0.0004171	0.8054	0.03739	0.3045	12	1508	PRMT6,CDKN2A,CALCA,FEZF1,PITX1,MAEL,PAX9,FOXA1,AIM2,ZIC2,TNFSF4,MEN1
GO:0048706	embryonic skeletal system development	0.0004469	0.8629	0.03739	0.3045	4	136	HOXD10,HOXD11,MTHFD1,MEN1
GO:0051091	positive regulation of DNA-binding transcription factor activity	0.0004669	0.9016	0.03739	0.3045	5	247	CDKN2A,SPHK1,FOXA1,AIM2,ZIC2
GO:1903508	positive regulation of nucleic acid-templated transcription	0.0004702	0.908	0.03739	0.3045	12	1528	CDKN2A,PIM2,HOXD10,FEZF1,SPHK1,PITX1,PAX9,FOXA1,AIM2,ZIC2,TLX1,MEN1
GO:0045893	positive regulation of transcription, DNA-templated	0.0004702	0.908	0.03739	0.3045	12	1528	CDKN2A,PIM2,HOXD10,FEZF1,SPHK1,PITX1,PAX9,FOXA1,AIM2,ZIC2,TLX1,MEN1
GO:0010557	positive regulation of macromolecule biosynthetic process	0.0005134	0.9914	0.03739	0.3045	13	1777	CDKN2A,PIM2,HOXD10,FEZF1,SPHK1,PITX1,RPS9,PAX9,FOXA1,AIM2,ZIC2,TLX1,MEN1
GO:0046710	GDP metabolic process	0.0005193	1	0.03739	0.3045	2	13	NUDT18,MAGI3
GO:1902680	positive regulation of RNA biosynthetic process	0.0005228	1	0.03739	0.3045	12	1546	CDKN2A,PIM2,HOXD10,FEZF1,SPHK1,PITX1,PAX9,FOXA1,AIM2,ZIC2,TLX1,MEN1
GO:0043433	negative regulation of DNA-binding transcription factor activity	0.0006146	1	0.04239	0.3452	4	148	CDKN2A,AIM2,TNFSF4,MEN1
GO:0051254	positive regulation of RNA metabolic process	0.0006844	1	0.04557	0.3711	12	1593	CDKN2A,PIM2,HOXD10,FEZF1,SPHK1,PITX1,PAX9,FOXA1,AIM2,ZIC2,TLX1,MEN1
GO:0045165	cell fate commitment	0.0007468	1	0.04807	0.3915	5	274	HOXD10,PITX1,FOXA1,TLX1,MEN1
GO:0032652	regulation of interleukin-1 production	0.0007938	1	0.04945	0.4027	3	69	CALCA,SPHK1,AIM2
