# Supplementary material for: The transcriptional landscape analysis of basal cell carcinomas reveals novel signalling pathways and actionable targets
Source: Life Sci Alliance. 2021 May 10;4(7):e202000651. doi: 10.26508/lsa.202000651 (PMC8200290; doi:10.26508/lsa.202000651)
Supplement: Supplementary file 13 [file LSA-2020-00651_TableS13.xlsx]

## Sheet: TableS13
Supplementary Table 13. Upregulated PANTHER pathways in advanced BCC. Q-value FDR<0.05.
ID	Name	p-value	q-value Bonferroni	q-value FDR B&H	q-value FDR B&Y	Hit Count in Query List	Hit Count in Genome	Hit in Query List
P00034	Integrin signalling pathway	1.241e-09	2.341e-06	1.463e-07	1.188e-06	27	167	COL1A1,COL1A2,COL2A1,COL3A1,COL4A1,COL4A2,COL5A1,COL5A2,COL6A1,COL6A2,COL6A3,COL8A1,COL8A2,ITGA11,COL10A1,COL11A1,COL12A1,COL15A1,FN1,COL5A3,ITGA1,ITGA5,ITGAV,ITGB1,ITGB3,ITGB5,LIMS1
P00050	Plasminogen activating cascade	4.258e-05	0.08036	0.00196	0.01592	6	17	PLAT,PLAU,PLAUR,MMP1,MMP3,MMP13
