# Supplementary material for: The transcriptional landscape analysis of basal cell carcinomas reveals novel signalling pathways and actionable targets
Source: Life Sci Alliance. 2021 May 10;4(7):e202000651. doi: 10.26508/lsa.202000651 (PMC8200290; doi:10.26508/lsa.202000651)
Supplement: Supplementary file 16 [file LSA-2020-00651_TableS16.xlsx]

## Sheet: TableS16
Supplementary Table 16. Differentially-expressed genes between vismodegib-resistant BCC vs. vismodegib-sensitive BCC using edgeR. FDR<0.05 and FC>2 or FC<0.5.
Genes	logFC	logCPM	LR	PValue	FDR
ACPL2	1.91953	4.67065	14.2105	0.000163454	0.041619
CAPN6	4.20298	3.40126	14.034	0.000179532	0.0430687
DACT1	2.24603	4.57075	16.8465	4.05279e-05	0.0169349
EDAR	3.77906	5.64664	24.3827	7.89767e-07	0.00129128
FSTL1	2.16893	8.89874	14.0804	0.000175163	0.0430687
ID3	2.39864	4.2898	15.3095	9.1256e-05	0.0291635
KIAA0040	2.0308	6.84529	22.6759	1.91754e-06	0.00218311
LOC101929056	4.06267	0.50575	13.7216	0.000212004	0.0488843
MGAT5	1.24311	7.32305	15.2009	9.66574e-05	0.0298426
PDGFC	2.0298	5.55927	20.8185	5.04934e-06	0.00393907
SIX4	1.97963	3.33853	14.4123	0.000146839	0.0387656
TMEM132A	2.38878	5.62989	13.7789	0.000205632	0.048023
ACTBL2	-4.25057	-0.270816	17.8952	2.33412e-05	0.0114914
ADRB2	-3.07305	3.69886	36.4251	1.5865e-09	9.63321e-06
ATP11A	-2.37578	5.71493	30.1946	3.90804e-08	0.000118648
ATP2B2	-3.18025	0.318416	16.2285	5.61417e-05	0.0216741
BDH1	-3.36511	0.492708	27.1887	1.84533e-07	0.000420183
BMS1P20	-1.57621	5.35243	14.4857	0.000141231	0.038398
C10orf90	-2.51487	-0.449297	15.2715	9.31096e-05	0.0292428
C11orf42	-2.62702	-0.395136	14.8858	0.00011422	0.0335084
CACNA1F	-2.85559	0.442644	18.3105	1.87671e-05	0.00976748
CACNG8	-2.22074	-0.712432	14.0499	0.000178024	0.0430687
CAPN11	-2.42778	0.0501375	14.4518	0.000143789	0.0385185
CELF5	-4.54246	-1.08172	22.3132	2.3161e-06	0.00248177
CHRND	-3.99807	-1.10044	19.6945	9.08623e-06	0.00613017
CPNE5	-1.69796	2.41231	15.731	7.3016e-05	0.0246307
CPNE7	-2.22725	0.587078	18.9944	1.31102e-05	0.00746301
CYP2D7	-4.24537	-1.58693	19.6226	9.43449e-06	0.00613781
DNAH9	-2.74356	0.587515	18.6541	1.56712e-05	0.00839607
DONSON	-2.53529	5.24996	31.5269	1.967e-08	8.95771e-05
DSCAM	-3.99687	-0.33215	19.3461	1.0904e-05	0.00640733
ELFN2	-4.62732	1.62873	24.2396	8.50643e-07	0.00129128
F7	-2.26432	0.290633	15.51	8.2072e-05	0.0271822
FAM46C	-2.14568	4.36494	19.9759	7.84224e-06	0.00549439
FLJ16779	-3.67245	0.364828	18.0578	2.143e-05	0.0108436
IRF4	-1.92241	3.64975	20.7659	5.18982e-06	0.00393907
KCNH2	-2.76612	-0.0552764	18.7081	1.52333e-05	0.00839607
KLRF2	-5.03634	-0.324291	30.3838	3.54469e-08	0.000118648
KRT72	-3.49159	-0.171258	14.0324	0.000179689	0.0430687
KY	-2.31938	1.39065	16.8289	4.09055e-05	0.0169349
LAMB4	-3.3121	4.85587	21.5567	3.43525e-06	0.00292892
LINC00173	-2.81061	1.18246	16.3849	5.16965e-05	0.0204718
LINC00842	-2.46164	1.71732	14.8099	0.000118911	0.0338452
LOC101927181	-1.94809	1.67558	15.9733	6.42425e-05	0.0229459
LOC101929519	-4.19516	0.422283	24.7085	6.66906e-07	0.00121484
LOC646588	-4.21657	1.72093	23.6555	1.15215e-06	0.00161443
LRIT2	-4.11716	-0.596236	19.3479	1.0894e-05	0.00640733
MATN1	-2.15909	0.302858	14.8789	0.00011464	0.0335084
MEI1	-2.2233	1.71342	14.1985	0.000164502	0.041619
MIR650	-4.39126	3.7338	17.0759	3.59158e-05	0.0160065
MPL	-2.49858	1.12869	19.5255	9.92675e-06	0.00623537
MUC12	-3.6701	1.97988	22.0922	2.59862e-06	0.00253704
MUC16	-3.82137	3.44408	15.8778	6.7565e-05	0.023222
MYCBPAP	-2.99958	-0.000831837	21.6478	3.27578e-06	0.00292892
NEFM	-3.08898	0.542733	14.7516	0.00012264	0.0343695
NHEG1	-5.90568	0.391091	36.6341	1.42518e-09	9.63321e-06
NOS1	-2.68036	1.68849	14.8584	0.000115889	0.0335084
NUGGC	-3.14795	-0.392988	23.3316	1.36342e-06	0.001774
PAPLN	-2.8289	5.23226	27.1976	1.83688e-07	0.000420183
POLR2J3	-2.16723	0.605124	13.9529	0.000187452	0.0443458
POU2AF1	-2.39576	2.53119	15.8928	6.70339e-05	0.023222
RASSF6	-2.11259	2.17944	17.117	3.5146e-05	0.0160065
RSPH1	-2.45753	-0.163813	16.1596	5.82215e-05	0.0216741
SEZ6L	-3.83919	1.15896	23.0677	1.56394e-06	0.00189925
SLC13A5	-2.84103	0.911381	17.0242	3.69055e-05	0.0160065
SLC16A12	-2.5326	-0.435403	16.1342	5.90103e-05	0.0216741
SLC22A31	-3.70473	1.73713	14.9538	0.000110178	0.0334501
SLC36A2	-4.87481	-1.50491	37.7835	7.90477e-10	9.63321e-06
STRC	-2.37612	1.21329	14.4903	0.000140881	0.038398
TCTE1	-2.73771	0.0260421	16.7336	4.30132e-05	0.0174118
TG	-2.98791	1.73501	20.2876	6.663e-06	0.00485493
THSD7B	-4.29534	3.54422	24.8617	6.15953e-07	0.00121484
TNS4	-2.3978	6.9899	21.5005	3.53734e-06	0.00292892
TTC40	-3.76973	0.490606	16.1188	5.94918e-05	0.0216741
TTLL10	-2.73447	-0.218283	14.3044	0.000155499	0.0404654
TUBA4B	-2.80209	2.01469	15.4537	8.45529e-05	0.0275039
UNC80	-3.75779	0.154266	22.0574	2.64623e-06	0.00253704
VWCE	-2.05187	0.611784	17.1405	3.47142e-05	0.0160065
ZBTB16	-3.28338	1.65106	17.0318	3.67592e-05	0.0160065
