# Supplementary material for: The transcriptional landscape analysis of basal cell carcinomas reveals novel signalling pathways and actionable targets
Source: Life Sci Alliance. 2021 May 10;4(7):e202000651. doi: 10.26508/lsa.202000651 (PMC8200290; doi:10.26508/lsa.202000651)
Supplement: Supplementary file 17 [file LSA-2020-00651_TableS17.xlsx]

## Sheet: TableS17
Supplementary Table 17. Upregulated BioCarta pathways in vismodegib-resistant BCC. Q-value FDR<0.05.
ID	Name	p-value	q-value Bonferroni	q-value FDR B&H	q-value FDR B&Y	Hit Count in Query List	Hit Count in Genome	Hit in Query List
M17761	Wnt/beta-catenin Pathway	0.0002006	0.008025	0.008025	0.03433	2	34	DACT1,FSTL1
